# Supplementary material for: Deconstructive annulation mediated one-pot synthesis of xanthene derivatives
Source: Royal Society of Chemistry journal article supplement (doi:10.1039/d4ob00093e), 2024-01-01
Supplement: d4ob00093e1.pdf [file d4ob00093e1.pdf]

## Supporting Information

### Deconstructive annulation mediated one-pot synthesis of xanthene derivatives

Balasubramaniam Manikandan,<sup>a</sup> Subbiah Thamocharan,<sup>b</sup> Olivier Blacque,<sup>c</sup>

Subramaniapillai Selva Ganesan<sup>\*a</sup>

<sup>a</sup>Department of Chemistry, School of Chemical and Biotechnology, SASTRA Deemed University, Thanjavur-613401, Tamil Nadu, India Fax: +91(4362) 264120; Email [selva@biotech.sastra.edu](mailto:selva@biotech.sastra.edu)

<sup>b</sup>Biomolecular Crystallography Laboratory and DBT-Bioinformatics Center, School of Chemical and Biotechnology, SASTRA Deemed University, Thanjavur, 613401, Tamil Nadu, India

<sup>c</sup>Department of Chemistry, University of Zurich, Winterthurerstrasse 190, 8057 Zurich, Switzerland

### Contents

| S. No | Item                       | Page No |
|-------|----------------------------|---------|
| 1     | Materials & Methods        | S2-S13  |
| 2     | Single crystal XRD details | S14-S16 |
| 3     | Molecular docking analysis | S16-S17 |
| 4     | References                 | S18-S19 |
| 5     | Scanned copies of NMR      | S20-S70 |

## **Materials:**

$\beta$ -Naphthol,  $\alpha$ -Naphthol, 4-Nitrobenzaldehyde, Anisaldehyde, 2-Chlorobenzaldehyde, 4-Chlorobenzaldehyde, 4-Bromobenzaldehyde, 2-Bromobenzaldehyde, 3-Fluorobenzaldehyde, 4-Fluorobenzaldehyde, 4-Nitrobenzaldehyde and 2,4-Dichlorobenzaldehyde were purchased from Avra chemicals. Benzaldehyde, Pyrrolidine, Piperidine, Salicylaldehyde and Silica gel 100-200 mesh size was purchased from SRL Chemicals Pvt. Ltd. 3-Hydroxybenzaldehyde was purchased from Loba Chemie Pvt Ltd. Dimedone and 1,3-diphenylpropane-1,3-dione, 2-5-dichlorobenzaldehyde and 6-Bromo-2-naphthol was purchased from Aldrich. 3-nitrobenzaldehyde, 4-methoxybenzaldehyde and ethyl-3-oxo-3-phenylpropanoate were purchased from SD fine chemicals. Copper(II) trifluoromethanesulfonate was purchased from TCI Chemicals. Melting points were uncorrected.  $^1\text{H}$  NMR and  $^{13}\text{C}$  were recorded JEOL model 600 MHz spectrometer using TMS as an internal standard and  $\text{CDCl}_3$  and  $\text{DMSO-d}_6$  as a solvent. All the reactions were carried out in fume hood with necessary safety precautions.

## **Methods**

### **General procedure for the synthesis of derivatives 12-(2-chlorophenyl)-7a,8,9,10-tetrahydro-12H-naphtho[1,2-e]pyrrolo[2,1-b][1,3]oxazine**

#### **Starting material:**

The synthesis was carried out by closely following the previously reported procedure<sup>[1]</sup> (As per reported method Mohit L. Deb et. al). To a stirred solution of 1-((2-chlorophenyl)(pyrrolidin-1-yl)methyl)naphthalen-2-ol (500 mg, 1.48 mmol) in DMF (2 ml),  $\text{I}_2$  (5 mol %, 10 mg) and TBHP (70 % in  $\text{H}_2\text{O}$ , 141.9 mg, 1.03 mmol) was added and stirred in the oil bath at  $130^\circ\text{C}$  for stipulated time. After completion of the reaction (monitored by TLC), the reaction mixture was

cooled to room temperature and poured into ice-cold water (20 mL) and extracted with ethyl acetate (2 x 20 mL). The combined organic extracts were dried it over anhydrous Na<sub>2</sub>SO<sub>4</sub> and then removed the solvent under reduced pressure. The crude residue obtained was purified by column chromatography (silica gel, 100-200 mesh; ethyl acetate/hexane as eluent).

***General procedure for the synthesis of Benzo[a]xanthen-12-one derivatives (one-pot, two-step synthesis) (3a- 3e):***

To a stirred solution of 12-(2-chlorophenyl)-7a,8,9,10-tetrahydro-12H-naphtho[1,2-e]pyrrolo[2,1-b][1,3]oxazine (300 mg, 0.89 mmol) in DMSO (2 ml) was added with K<sub>2</sub>S<sub>2</sub>O<sub>8</sub> (362.2 mg, 1.33 mmol) and AgNO<sub>3</sub> (45.5 mg, 0.267 mmol). The reaction mixture was stirred vigorously at 100 °C for an hour. To the same reaction tube, K<sub>2</sub>CO<sub>3</sub> (370 mg, 2.67 mmol), copper powder (4.5 mg, 0.07 mmol) and Cu<sub>2</sub>O (5.6 mg, 0.04 mmol) was added and stirred in the oil bath at 130 °C for 12 hours. After completion of the reaction (monitored by TLC), the reaction mixture was cooled to room temperature and poured into ice-cold water (10 mL) and extracted with ethyl acetate (3 x 5 mL). The combined extracts were dried it over anhydrous Na<sub>2</sub>SO<sub>4</sub> and then removed the solvent under reduced pressure. The crude was purified by column chromatography (silica gel, 100-200 mesh; ethyl acetate/hexane as eluent).

**12H-benzo[a]xanthen-12-one (3a) :** White solid, Reaction carried out with 0.893 mmol of oxazine substrate. Yield = 61% (133.8 mg), Mp: 153- 154 °C (152- 154 °C <sup>[10]</sup>); <sup>1</sup>H NMR (600 MHz, CDCl<sub>3</sub>): 7.33-7.36 (m, 1H), 7.44-7.46 (m, 2H), 7.49- 7.52 (m, 1H), 7.62- 7.64 (m, 1H), 7.68- 7.71 (m, 1H), 7.80 (d, *J* = 7.8 Hz, 1H), 8.02 (d, *J* = 7.8 Hz, 1H), 8.35 (dd, *J* = 7.8 Hz, *J* = 1.8 Hz, 1H), 9.99 (d, *J* = 6.0 Hz, 1H). <sup>13</sup>C NMR (150 MHz, CDCl<sub>3</sub>): δ 114.6, 117.5, 118.0, 123.6, 124.3, 126.1, 126.7, 127.0, 128.4, 129.6, 130.1, 131.2, 133.9, 136.7, 154.7, 157.6, 178.5.

**9-chloro-12H-benzo[a]xanthen-12-one (3b):** Reaction carried out with 1.343 mmol of oxazine substrate. Pale yellow semi-solid<sup>[11]</sup>, Yield = 66% (248.25 mg), <sup>1</sup>H NMR (600 MHz, CDCl<sub>3</sub>): 7.43- 7.46 (m, 1H), 7.55- 7.58 (m, 1H), 7.59- 7.62 (m, 1H), 7.72- 7.75 (m, 1H), 7.77- 7.80 (m, 1H), 7.91 (d, *J* = 6.6 Hz, 1H), 8.13 (d, *J* = 9.0 Hz, 1H), 8.45 (dd, *J*<sub>1</sub> = 8.4 Hz, *J*<sub>2</sub> = 1.8 Hz, 1H), 10.10 (d, *J* = 7.8 Hz, 1H). <sup>13</sup>C NMR (150 MHz, CDCl<sub>3</sub>): δ 114.6, 117.5, 118.0, 123.6, 124.3, 126.1, 126.7, 127.0, 128.3, 129.6, 130.1, 131.2, 134.0, 136.7, 154.7, 157.6, 178.5.

**7H-benzo[c]xanthen-7-one (3c):** White solid, Reaction carried out with 0.297 mmol of oxazine substrate. Yield = 63% (46.3 mg), Mp: 154- 157 °C (159- 161 °C <sup>[10]</sup>); <sup>1</sup>H NMR (600 MHz, CDCl<sub>3</sub>): 7.38-7.41 (m, 1H), 7.50- 7.57 (m, 3H), 7.67- 7.74 (m, 2H), 7.86 (d, *J* = 9.6 Hz, 1H), 8.09 (d, *J* = 9.0 Hz, 1H), 8.39 (d, *J* = 9.6 Hz, 1H), 10.04 (d, *J* = 9.6 Hz, 1H). <sup>13</sup>C NMR (150 MHz, CDCl<sub>3</sub>): δ 114.6, 117.5, 118.1, 123.6, 124.3, 126.2, 126.6, 126.9, 128.3, 129.6, 130.1, 131.2, 133.9, 136.7, 154.7, 157.6, 178.5.

**2-Bromo-7H-benzo[c]xanthen-7-one (3d):** White solid, Reaction carried out with 0.120 mmol of oxazine substrate. Yield = 63% (24.87 mg), Mp: 219- 221 °C (218- 221 °C <sup>[10]</sup>); <sup>1</sup>H NMR (600 MHz, CDCl<sub>3</sub>): 7.45- 7.48 (m, 1H), 7.56- 7.61 (m, 2H), 7.74- 7.77 (m, 1H), 7.84 (dd, *J*<sub>1</sub> = 9.0 Hz, *J*<sub>2</sub> = 1.8 Hz, 1H), 8.03- 8.05 (m, 2H), 8.43 (dd, *J*<sub>1</sub> = 7.8 Hz, *J*<sub>2</sub> = 0.9 Hz, 1H), 10.00 (d, *J* = 9.6 Hz, 1H). <sup>13</sup>C NMR (150 MHz, CDCl<sub>3</sub>): δ 114.6, 117.6, 119.4, 120.2, 123.4, 124.5, 126.7, 128.8, 129.7, 130.3, 131.5, 132.5, 134.2, 135.4, 154.6, 157.5, 178.2.

**9-Chloro-7H-benzo[c]xanthen-7-one (3e):** Pale yellow solid, Reaction carried out with 0.135 mmol of oxazine substrate. Yield = 53% (20.02 mg), Mp: 220- 222 °C (224- 226 °C <sup>[10]</sup>); <sup>1</sup>H NMR (600 MHz, CDCl<sub>3</sub>): 7.43- 7.46 (m, 1H), 7.56- 7.58 (m, 1H), 7.59- 7.62 (m, 1H), 7.72- 7.75 (m, 1H), 7.77- 7.80 (m, 1H), 7.91 (d, *J* = 6.6 Hz, 1H), 8.13 (d, *J* = 9.0 Hz, 1H), 8.45 (dd, *J*<sub>1</sub> = 8.4 Hz, *J*<sub>2</sub> = 1.8 Hz, 1H), 10.10 (d, *J* = 7.8 Hz, 1H). <sup>13</sup>C NMR (150 MHz, CDCl<sub>3</sub>): δ 114.6,

117.5, 118.0, 123.6, 124.3, 126.1, 126.7, 127.0, 128.3, 129.6, 130.1, 131.2, 133.9, 136.7, 154.7, 157.6, 178.5.

**General procedure for the synthesis of 12H-Benzo[a]xanthen-12-one derivatives (one-pot procedure):**

To a stirred solution of 12-(2-chlorophenyl)-7a,8,9,10-tetrahydro-12H-naphtho[1,2-e]pyrrolo[2,1-b][1,3]oxazine (10 mg, 0.03 mmol) in DMF (1 ml), Cs<sub>2</sub>CO<sub>3</sub> (38 mg, 0.12 mmol) and copper powder (1.44mg, 0.02 mmol ) was added and stirred in the oil bath at 130 °C for 20 hours. After completion of the reaction (monitored by TLC), the reaction mixture was cooled to room temperature and poured into ice-cold water (10 mL) and extracted with ethyl acetate (3 x 5 mL). The combined extracts were dried over anhydrous Na<sub>2</sub>SO<sub>4</sub> and then removed the solvent under reduced pressure. Purified the crude by column chromatography (silica gel, 100-200 mesh; ethyl acetate/hexane as eluent).

**The synthesized compounds were crosschecked with the previously obtained product.**

**They are matching satisfactorily.**

**12H-benzo[a]xanthen-12-one (3a):** White solid, Reaction carried out with 0.0297 mmol of oxazine substrate. Yield = 81% (5.9 mg)

**9-chloro-12H-benzo[a]xanthen-12-one (3b):** Reaction carried out with 0.270 mmol of oxazine substrate. Half white solid, Yield = 64% (48 mg),

**General procedure for the synthesis of 9,9-dimethyl-12-phenyl-8,9,10,12-tetrahydro-11H-benzo[a]xanthen-11-one derivatives (4a-s)**

To a stirred solution of 12-phenyl-7a,8,9,10-tetrahydro-12H-naphtho[1,2-e]pyrrolo[2,1-b][1,3]oxazine (50 mg, 0.165 mmol) in 1,2-dichloroethane (5 ml), K<sub>2</sub>S<sub>2</sub>O<sub>8</sub> (64.8 mg, 0.24 mmol) and AgNO<sub>3</sub> (8.2 mg, 0.048 mmol) was added and stirred in the oil bath at 100 °C for 1.5 hours. After 1.5 hours, 5,5-dimethylcyclohexane-1,3-dione (33.6 mg, 0.24 mmol) and copper(II) triflate (5.78 mg, 0.016 mmol) is added in the reaction mixture and stirred at 90 °C for 4 hours. After completion of the reaction, the reaction mixture was cooled to room temperature, quenched with water (10 mL) and extracted with ethyl acetate (2×20 mL). The combined organic extracts were dried over anhydrous Na<sub>2</sub>SO<sub>4</sub>, concentrated under reduced pressure and the crude sample was purified by silica gel (100-200 mesh) column chromatography with ethyl acetate:hexane(1:10 v/v) as eluent.

**9,9-dimethyl-12-phenyl-8,9,10,12-tetrahydro-11H-benzo[a]xanthen-11-one (4a):**

Reaction carried out with 0.165 mmol of oxazine substrate. White Solid, Yield = 80% (46.6 mg) Mp: 152-154 °C (154-155 °C<sup>[2]</sup>) <sup>1</sup>H NMR (600 MHz, CDCl<sub>3</sub>): δ 0.89 (s, 3H), 1.03 (s, 3H), 2.18 (d, *J* = 16.2 Hz, 1H), 2.24 (d, *J* = 16.2 Hz, 1H), 2.48 (s, 2H), 5.71 (s, 1H), 6.99-7.02 (m, 1H), 7.13-7.18 (m, 2H), 7.27-7.37 (m, 5H), 7.67-7.70 (m, 2H), 7.98 (d, *J* = 8.4 Hz, 1H). <sup>13</sup>C NMR (150 MHz, CDCl<sub>3</sub>): δ 26.9, 29.1, 31.9, 34.6, 41.2, 50.7, 114.1, 116.9, 117.5, 123.5, 124.7, 126.1, 126.8, 128.1, 128.2, 128.3, 128.7, 131.2, 131.3, 144.6, 147.6, 163.6, 196.6.

**9,9-dimethyl-12-(p-tolyl)-8,9,10,12-tetrahydro-11H-benzo[a]xanthen-11-one (4b) :**

Reaction carried out with 0.475 mmol of oxazine substrate. White Crystals, Yield = 81 % (142.3 mg), Mp: 173-176 °C (175-177 °C<sup>[3]</sup>); <sup>1</sup>H NMR (600 MHz, CDCl<sub>3</sub>): δ 0.97 (s, 3H), 1.11 (s, 3H), 2.19 (s, 3H), 2.24 (d, *J* = 16.8 Hz, 1H), 2.29 (d, *J* = 16.2 Hz, 1H), 2.56 (s, 2H), 5.66 (s, 1H), 6.96 (d, *J* = 7.8 Hz, 2H), 7.21-7.43 (m, 5H), 7.72-7.76 (m, 2H), 8.00 (d, *J* = 8.4 Hz, 1H).

$^{13}\text{C}$  NMR (150 MHz,  $\text{CDCl}_3$ ):  $\delta$  20.9, 27.2, 29.2, 32.2, 34.3, 41.4, 50.9, 114.4, 117.0, 117.9, 123.7, 124.8, 126.9, 128.2, 128.3, 128.7, 128.9, 131.4, 131.5, 135.6, 141.8, 147.7, 163.7, 196.9.

**12-(4-methoxyphenyl)-9,9-dimethyl-8,9,10,12-tetrahydro-11H-benzo[a]xanthen-11-one**

**(4c):** Reaction carried out with 0.301 mmol of oxazine substrate. White Crystals, Yield = 76% (88.3 mg), Mp: 202-205 °C (205-206 °C<sup>[2]</sup>);  $^1\text{H}$  NMR (600 MHz,  $\text{CDCl}_3$ ):  $\delta$  0.96 (s, 3H), 1.10 (s, 3H), 2.24 (d,  $J = 16.2$  Hz, 1H), 2.29 (d,  $J = 16.2$  Hz, 1H), 2.55 (s, 2H), 3.67 (s, 3H), 5.66 (s, 1H), 6.69-6.71 (m, 2H), 7.24-7.43 (m, 5H), 7.73-7.77 (m, 2H), 7.98 (d,  $J = 8.4$  Hz, 1H).  $^{13}\text{C}$  NMR (150 MHz,  $\text{CDCl}_3$ ):  $\delta$  27.2, 29.3, 32.2, 33.8, 41.4, 50.9, 55.0, 113.6, 114.4, 117.0, 117.9, 123.7, 124.8, 126.9, 128.3, 128.7, 129.3, 131.4, 131.5, 137.1, 147.7, 157.7, 163.6, 197.0.

**9,9-dimethyl-12-(4-nitrophenyl)-8,9,10,12-tetrahydro-11H-benzo[a]xanthen-11-one (4d):**

Reaction carried out with 0.433 mmol of oxazine substrate. Pale yellow Solid, Yield = 89% (154.0 mg), Mp: 174-177 °C (176-178 °C<sup>[3]</sup>);  $^1\text{H}$  NMR (600 MHz,  $\text{CDCl}_3$ ):  $\delta$  0.94 (s, 3H), 1.13 (s, 3H), 2.25 (d,  $J = 16.2$  Hz, 1H), 2.33 (d,  $J = 16.2$  Hz, 1H), 2.60 (s, 2H), 5.81 (s, 1H), 7.35-7.45 (m, 3H), 7.51-7.52 (m, 2H), 7.80-7.84 (m, 3H), 8.03 (d,  $J = 6.6$  Hz, 2H).  $^{13}\text{C}$  NMR (150 MHz,  $\text{CDCl}_3$ ):  $\delta$  27.0, 29.3, 32.2, 34.8, 41.4, 50.7, 112.9, 116.0, 117.1, 123.1, 123.6, 125.2, 127.3, 128.6, 129.3, 129.6, 131.0, 131.5, 146.3, 147.8, 151.8, 164.6, 196.7.

**12-(4-fluorophenyl)-9,9-dimethyl-8,9,10,12-tetrahydro-11H-benzo[a]xanthen-11-one**

**(4e):** Reaction carried out with 0.313 mmol of oxazine substrate. White Solid, Yield = 76 % (89.16 mg), Mp: 186-188 °C (185-186 °C<sup>[3]</sup>);  $^1\text{H}$  NMR (600 MHz,  $\text{CDCl}_3$ ):  $\delta$  0.93 (s, 3H), 1.09 (s, 3H), 2.25 (d,  $J = 16.8$  Hz, 1H), 2.28 (d,  $J = 16.8$  Hz, 1H), 2.53 (s, 2H), 5.69 (s, 1H), 6.82-6.86 (m, 2H), 7.28-7.42 (m, 5H), 7.73-7.76 (m, 2H), 7.91 (d,  $J = 8.4$  Hz, 1H).  $^{13}\text{C}$  NMR (150

MHz, CDCl<sub>3</sub>):  $\delta$  27.0, 29.2, 32.1, 33.9, 41.3, 50.8, 114.0, 114.9, 115.0, 117.0, 117.3, 123.4, 124.9, 127.0, 128.4, 128.9, 129.8, 129.9, 131.2, 131.5, 140.5, 147.7, 160.3, 161.9, 163.8, 196.8.

**12-(4-bromophenyl)-9,9-dimethyl-8,9,10,12-tetrahydro-11H-benzo[a]xanthen-11-one**

**(4f):** Reaction carried out with 0.210 mmol of oxazine substrate. White Solid, Yield = 85 % (78.2 mg), Mp: 188-189 °C (187-189 °C<sup>[3]</sup>); <sup>1</sup>H NMR (600 MHz, CDCl<sub>3</sub>):  $\delta$  0.97 (s, 3H), 1.12 (s, 3H), 2.25 (d, *J* = 16.2 Hz, 1H), 2.31 (d, *J* = 16.2 Hz, 1H), 2.57 (s, 2H), 5.67 (s, 1H), 7.20-7.23 (m, 2H), 7.27-7.33 (m, 3H), 7.38-7.45 (m, 2H), 7.77-7.80 (m, 2H), 7.89 (d, *J* = 8.4 Hz, 1H). <sup>13</sup>C NMR (150 MHz, CDCl<sub>3</sub>):  $\delta$  27.1, 29.3, 32.3, 34.2, 41.4, 50.8, 113.7, 116.9, 117.0, 120.1, 123.4, 125.0, 127.1, 128.5, 129.1, 130.2, 131.2, 131.3, 131.5, 143.7, 147.7, 164.1, 196.9.

**12-(4-chlorophenyl)-9,9-dimethyl-8,9,10,12-tetrahydro-11H benzo[a]xanthen-11-one**

**(4g):** Reaction carried out with 0.297 mmol of oxazine substrate. White Crystals, Yield = 80% (92.2 mg), Mp: 182-184 °C (181-182 °C<sup>[2]</sup>); <sup>1</sup>H NMR (600 MHz, CDCl<sub>3</sub>):  $\delta$  0.94 (s, 3H), 1.10 (s, 3H), 2.23 (d, *J* = 16.2 Hz, 1H), 2.29 (d, *J* = 16.2 Hz, 1H), 2.54 (s, 2H), 5.68 (s, 1H), 7.11-7.13 (m, 2H), 7.26-7.43 (m, 5H), 7.74-7.77 (m, 2H), 7.89 (d, *J* = 7.8 Hz, 1H). <sup>13</sup>C NMR (150 MHz, CDCl<sub>3</sub>):  $\delta$  27.0, 29.2, 32.2, 34.1, 41.3, 50.8, 113.8, 117.0, 123.4, 125.0, 127.1, 128.3, 128.4, 129.0, 129.7, 131.2, 131.5, 131.9, 143.2, 147.7, 164.0, 196.8.

**12-(2-bromophenyl)-9,9-dimethyl-8,9,10,12-tetrahydro-11H-benzo[a]xanthen-11-one**

**(4h):** Reaction carried out with 0.210 mmol of oxazine substrate. White Solid, Yield = 78 % (70.8 mg), Mp: 171-173 °C (169- 171 °C<sup>[4]</sup>); <sup>1</sup>H NMR (600 MHz, CDCl<sub>3</sub>):  $\delta$  0.98 (s, 3H), 1.12 (s, 3H), 2.22 (d, *J* = 16.2 Hz, 1H), 2.30 (d, *J* = 16.2 Hz, 1H), 2.59 (s, 2H), 5.95 (s, 1H), 6.87-6.91 (m, 1H), 7.05- 7.08 (m, 1H), 7.20-7.29 (m, 2H), 7.36-7.50 (m, 3H), 7.72-7.76 (m, 2H), 8.30 (d, *J* = 8.4 Hz, 1H). <sup>13</sup>C NMR (150 MHz, CDCl<sub>3</sub>):  $\delta$  27.1, 29.3, 32.1, 35.3, 41.5, 50.9,



113.7, 117.1, 117.7, 123.5, 124.4, 124.9, 127.0, 127.5, 127.8, 128.3, 129.1, 131.4, 131.7, 133.3, 144.0, 147.6, 164.0, 196.7.

**12-(2-chlorophenyl)-9,9-dimethyl-8,9,10,12-tetrahydro-11H benzo[a]xanthen-11-one**

**(4i):** Reaction carried out with 0.297 mmol of oxazine substrate. White Crystals, Yield = 62.6 % (72.0 mg), Mp: 174-176 °C (175-176 °C<sup>[3]</sup>); <sup>1</sup>H NMR (600 MHz, CDCl<sub>3</sub>): δ 0.98 (s, 3H), 1.12 (s, 3H), 2.22 (d, *J* = 16.2 Hz, 1H), 2.30 (d, *J* = 16.2 Hz, 1H), 2.55-2.62 (m, 2H), 5.99 (s, 1H), 6.96-7.05 (m, 2H), 7.25-7.48 (m, 5H), 7.72-7.75 (m, 2H), 8.22 (d, *J* = 7.8 Hz, 1H). <sup>13</sup>C NMR (150 MHz, CDCl<sub>3</sub>): δ 27.1, 29.3, 32.1, 32.9, 41.4, 50.8, 113.4, 117.0, 117.4, 123.9, 124.9, 126.8, 127.1, 127.6, 128.3, 129.1, 129.9, 131.3, 131.6, 132.9, 142.1, 147.6, 164.2, 196.7.

**12-(2-hydroxyphenyl)-9,9-dimethyl-8,9,10,12-tetrahydro-11H-benzo[a]xanthen-11-one**

**(4j):** Reaction carried out with 0.315 mmol of oxazine substrate. White Solid, Yield = 76 % (89.1 mg), Mp: 131-133 °C (132-133 °C<sup>[3]</sup>); <sup>1</sup>H NMR (600 MHz, CDCl<sub>3</sub>): δ 0.99 (s, 3H), 1.15 (s, 3H), 2.36 (d, *J* = 16.2 Hz, 1H), 2.41 (d, *J* = 16.2 Hz, 1H), 2.61 (s, 2H), 5.77 (s, 1H), 6.59-6.63 (m, 2H), 6.98-7.02 (m, 2H), 7.32-7.41 (m, 3H), 7.67 (d, *J* = 9.6 Hz, 1H), 7.76-7.79 (m, 2H), 9.26 (s, 1H). <sup>13</sup>C NMR (150 MHz, CDCl<sub>3</sub>): δ 27.3, 28.0, 29.0, 32.4, 41.6, 50.2, 113.9, 116.6, 117.5, 118.8, 121.5, 123.5, 125.3, 127.5, 127.9, 128.2, 128.7, 129.1, 131.1, 131.5, 132.7, 147.8, 152.8, 166.8, 200.6.

**9,9-dimethyl-12-(3-nitrophenyl)-8,9,10,12-tetrahydro-11H-benzo[a]xanthen-11-one (4k):**

Reaction carried out with 0.288 mmol of oxazine substrate. White Solid, Yield = 85% (98.5 mg), Mp: 168-171 °C (169-170 °C<sup>[2]</sup>); <sup>1</sup>H NMR (600 MHz, CDCl<sub>3</sub>): δ 0.95 (s, 3H), 1.13 (s, 3H), 2.24 (d, *J* = 16.2 Hz, 1H), 2.32 (d, *J* = 16.2 Hz, 1H), 2.60 (s, 2H), 5.81 (s, 1H), 7.34-7.45 (m, 4H), 7.78-7.81 (m, 3H), 7.86 (d, *J* = 7.2 Hz, 1H), 7.91-7.93 (m, 1H), 8.11-8.12 (m, 1H).

<sup>13</sup>C NMR (150 MHz, CDCl<sub>3</sub>): δ 27.1, 29.2, 32.3, 34.7, 41.3, 50.7, 113.1, 116.0, 117.2, 121.5, 123.1, 123.2, 125.1, 127.3, 128.6, 129.0, 129.6, 130.9, 131.5, 134.8, 146.7, 147.8, 148.4, 164.5, 196.7.

**12-(3-hydroxyphenyl)-9,9-dimethyl-8,9,10,12-tetrahydro-11H-benzo[a]xanthen-11-one**

**(4l):** Reaction carried out with 0.252 mmol of oxazine substrate. White Solid, Yield = 67.3 % (62.9 mg), Mp: 222-225 °C (225-227 °C<sup>[5]</sup>); <sup>1</sup>H NMR (600 MHz, CDCl<sub>3</sub>): δ 0.89 (s, 3H), 1.02 (s, 3H), 2.14 (d, *J* = 16.2 Hz, 1H), 2.20 (d, *J* = 16.2 Hz, 1H), 2.47 (s, 2H), 5.53 (s, 1H), 6.47 (d, *J* = 10.8 Hz, 1H), 6.71-6.91 (m, 3H), 7.22-7.34 (m, 3H), 7.64-7.67 (m, 2H), 7.93 (d, *J* = 10.8 Hz, 1H), 8.52 (s, 1H). <sup>13</sup>C NMR (150 MHz, CDCl<sub>3</sub>): δ 26.8, 28.7, 31.8, 34.1, 40.9, 50.5, 113.2, 113.7, 115.3, 116.7, 117.3, 119.3, 123.3, 124.4, 126.5, 127.9, 128.2, 128.6, 131.0, 145.7, 147.2, 156.6, 163.5, 196.4.

**12-(3-methoxyphenyl)-9,9-dimethyl-8,9,10,12-tetrahydro-11H-benzo[a]xanthen-11-one**

**(4m):** Reaction carried out with 0.302 mmol of oxazine substrate. White Solid, Yield = 68% (79.5 mg), Mp: 219-220 °C (219- 221 °C<sup>[6]</sup>); <sup>1</sup>H NMR (600 MHz, CDCl<sub>3</sub>): δ 0.96 (s, 3H), 1.09 (s, 3H), 2.24 (d, *J* = 16.8 Hz, 1H), 2.29 (d, *J* = 16.8 Hz, 1H), 2.54 (s, 2H), 3.69 (s, 3H), 5.69 (s, 1H), 6.58-6.60 (m, 1H), 6.90-6.94 (m, 2H), 7.06-7.09 (m, 1H), 7.30 (d, *J* = 9.0 Hz, 1H), 7.33-7.428 (m, 2H), 7.72-7.76 (m, 2H), 7.99 (d, *J* = 9.6 Hz, 1H). <sup>13</sup>C NMR (150 MHz, CDCl<sub>3</sub>): δ 27.2, 29.2, 32.2, 34.6, 41.3, 50.8, 55.0, 111.2, 114.1, 114.6, 117.0, 117.5, 120.9, 123.6, 124.8, 126.9, 128.3, 128.8, 129.0, 131.4, 146.3, 147.7, 159.4, 163.9, 196.8.

**12-(3-chlorophenyl)-9,9-dimethyl-8,9,10,12-tetrahydro-11H benzo[a]xanthen-11-one**

**(4n):** Reaction carried out with 0.297 mmol of oxazine substrate. White Crystals, Yield = 85 % (98 mg), Mp: 174-176 °C (173-174 °C<sup>[3]</sup>); <sup>1</sup>H NMR (600 MHz, CDCl<sub>3</sub>): δ 0.95 (s, 3H), 1.09

(s, 3H), 2.24 (d,  $J = 17.4$  Hz, 1H), 2.29 (d,  $J = 16.2$  Hz, 1H), 2.52 (d,  $J = 17.4$  Hz, 1H), 2.56 (d,  $J = 17.4$  Hz, 1H), 5.68 (s, 1H), 7.01-7.10 (m, 2H), 7.23-7.44 (m, 5H), 7.74-7.77 (m, 2H), 7.91 (d,  $J = 9.6$  Hz, 1H).  $^{13}\text{C}$  NMR (150 MHz,  $\text{CDCl}_3$ ):  $\delta$  27.1, 29.2, 32.2, 34.5, 41.3, 50.8, 113.6, 116.8, 117.0, 123.4, 124.9, 126.5, 126.8, 127.1, 128.3, 128.4, 129.1, 129.4, 131.2, 131.5, 134.0, 146.6, 147.7, 164.2, 196.6.

**12-(3-fluorophenyl)-9,9-dimethyl-8,9,10,12-tetrahydro-11H-benzo[a]xanthen-11-one**

**(4o):** Reaction carried out with 0.313 mmol of oxazine substrate. White Solid, Yield = 80 % (93.02 mg), Mp: 220- 223 °C (224- 226 °C<sup>[6]</sup>);  $^1\text{H}$  NMR (600 MHz,  $\text{CDCl}_3$ ):  $\delta$  0.97 (s, 3H), 1.12 (s, 3H), 2.26 (d,  $J = 16.2$  Hz, 1H), 2.31 (d,  $J = 16.2$  Hz, 1H), 2.57 (s, 2H), 5.72 (s, 1H), 6.73- 6.77 (m, 1H), 6.97- 7.00 (m, 1H), 7.12-7.18 (m, 2H), 7.33 (d,  $J = 9$  Hz, 1H), 7.38-7.46 (m, 2H), 7.76- 7.80 (m, 2H), 7.93 (d,  $J = 9.6$  Hz, 1H).  $^{13}\text{C}$  NMR (150 MHz,  $\text{CDCl}_3$ ):  $\delta$  27.1, 29.3, 32.2, 34.4, 41.4, 50.8, 113.2, 113.3, 113.8, 115.2, 115.4, 116.9, 117.0, 123.5, 124.2, 125.0, 127.1, 128.5, 129.1, 129.6, 131.3, 131.5, 147.1, 147.7, 162.0, 163.6, 164.1, 196.8.

**(1,3-diphenyl-1H-benzo[f]chromen-2-yl)(phenyl)methanone (4p):** Reaction carried out with 0.166 mmol of oxazine substrate. White solid, Yield = 71 % (52 mg), Mp: 190- 193 °C (191 °C<sup>[7]</sup>);  $^1\text{H}$  NMR (600 MHz,  $\text{CDCl}_3$ ): 5.91 (s, 1H), 6.96- 7.18 (m, 9H), 7.31-7.43 (m, 9H), 7.80 (d,  $J = 9.0$  Hz, 2H), 7.94 (d,  $J = 8.4$  Hz, 1H).  $^{13}\text{C}$  NMR (150 MHz,  $\text{CDCl}_3$ ):  $\delta$  41.3, 115.4, 116.3, 117.3, 123.5, 124.6, 126.6, 126.9, 127.6, 127.8, 128.0, 128.5, 128.6, 129.0, 129.2, 129.6, 131.2, 131.4, 131.7, 133.8, 138.6, 144.5, 148.7, 154.2, 198.0.

**(1-(4-chlorophenyl)-3-phenyl-1H-benzo[f]chromen-2-yl)(phenyl)methanone (4q):** Reaction carried out with 0.297 mmol of oxazine substrate. Pale yellow solid, Yield = 69 % (96 mg), Mp: 207- 209 °C (208 °C<sup>[7]</sup>);  $^1\text{H}$  NMR (600 MHz,  $\text{CDCl}_3$ ): 5.87 (s, 1H), 7.00-7.03

(m, 2H), 7.08- 7.17 (m, 6H), 7.31-7.46 (m, 9H), 7.83 (d,  $J = 9.0$  Hz, 2H), 7.89 (d,  $J = 8.4$  Hz, 1H).  $^{13}\text{C}$  NMR (150 MHz,  $\text{CDCl}_3$ ):  $\delta$  40.5, 114.7, 116.1, 117.3, 123.2, 124.8, 127.1, 127.7, 127.9, 128.6, 128.8, 129.0, 129.2, 129.3, 129.4, 129.9, 131.0, 131.4, 131.8, 132.4, 133.6, 138.5, 143.2, 148.7, 155.4, 197.7.

**12-phenyl-8,9,10,12-tetrahydro-11H-benzo[a]xanthen-11-one (4r):** Reaction carried out with 0.331 mmol of oxazine substrate. White Solid, Yield = 83.11 % (89.79 mg) Mp: 201-203 °C (202- 203 °C<sup>[2]</sup>)  $^1\text{H}$  NMR (600 MHz,  $\text{CDCl}_3$ ):  $\delta$  1.91-2.03 (m, 2H), 2.32- 2.44 (m, 2H), 2.60-2.72 (m, 2H), 5.73 (s, 1H), 7.03-7.06 (m, 1H), 7.15-7.17 (m, 2H), 7.31-7.35 (m, 4H), 7.38-7.41 (m, 1H), 7.73-7.76 (m, 2H), 7.95 (d,  $J = 8.4$  Hz, 1H).  $^{13}\text{C}$  NMR (150 MHz,  $\text{CDCl}_3$ ):  $\delta$  20.2, 27.7, 34.6, 37.0, 115.5, 116.9, 117.6, 123.6, 124.8, 126.2, 126.9, 128.2, 128.3, 128.4, 128.7, 131.3, 131.4, 145.0, 147.7, 165.5, 197.0.

***General procedure for the synthesis of 14-phenyl-14H-dibenzo[a,j]xanthene (4s):***

To a stirred solution of 12-(4-nitrophenyl)-7a,8,9,10-tetrahydro-12H-naphtho[1,2-e]pyrrolo[2,1-b][1,3]oxazine (50 mg, 0.144 mmol) in water:acetone mixture (4 mL; 1:1 v/v) and stirred in 100 °C for an hour. After that the same reaction tube, 21 mg (0.141 mmol)  $\beta$ -naphthol was added along with copper powder (1 mg, 0.014 mmol) and the reaction mixture was stirred vigorously at 100 °C for 4 hours. After completion of the reaction (monitored by TLC), the reaction mixture was cooled to room temperature and poured into ice-cold water (10 mL) and extracted with ethyl acetate (3 x 5 mL). The combined extracts were dried over anhydrous  $\text{Na}_2\text{SO}_4$  and then removed the solvent under reduced pressure. The crude was purified by column chromatography (silica gel, 100-200 mesh; ethyl acetate/hexane as eluent).

**14-(4-nitrophenyl)-14H-dibenzo[a,j]xanthene (4s):** Reaction carried out with 0.144 mmol of oxazine substrate. White solid, Yield = 87 % (50.82 mg), Mp: 309- 311 °C (312- 313 °C<sup>[8]</sup>); <sup>1</sup>H NMR (600 MHz, CDCl<sub>3</sub>): 6.59 (s, 1H), 7.42- 7.45 (m, 2H), 7.50 (d, *J* = 7.2 Hz, 2H), 7.58- 7.60 (m, 2H), 7.67 (d, *J* = 7.2 Hz, 2H), 7.82- 7.85 (m, 4H), 8.00 (d, *J* = 7.8 Hz, 2H), 8.28 (d, *J* = 8.4 Hz, 2H). <sup>13</sup>C NMR (150 MHz, CDCl<sub>3</sub>): δ 37.9, 115.8, 118.1, 122.0, 123.9, 124.6, 127.2, 128.9, 129.1, 129.6, 131.1, 146.3, 148.8, 152.0.

**(2-chlorophenyl)(2-hydroxynaphthalen-1-yl)methanone (2a):**<sup>[9]</sup> White solid, Yield = 83% (As given in Table 1, Entry 4 in the manuscript), Mp: 123-125; <sup>1</sup>H NMR (600 MHz, CDCl<sub>3</sub>): 7.20-7.25 (m, 2H), 7.29-7.31 (m, 2H), 7.39 (d, *J* = 9.0 Hz, 2H), 7.58 (d, *J* = 7.8 Hz, 2H), 7.77 (d, *J* = 9.0 Hz, 1H), 7.95 (d, *J* = 9 Hz, 1H), 11.01 (s, 1H). <sup>13</sup>C NMR (150 MHz, CDCl<sub>3</sub>): δ 114.1, 119.2, 123.9, 126.1, 126.9, 128.5, 128.7, 128.9, 130.9, 132.1, 136.5, 138.5, 139.1, 161.4, 198.9.

**1-((2-chlorophenyl)(pyrrolidin-1-yl)methyl)naphthalen-2-ol (IM):**

White solid, Yield = 39% (As given in **Scheme 3, (i)a** Entry in the manuscript), Mp: 163-167 (160-164 °C)<sup>23</sup>; <sup>1</sup>H NMR (600 MHz, CDCl<sub>3</sub>): 1.76- 1.92 (m, 4H), 2.37- 2.42 (m, 1H), 2.51- 2.63 (m, 2H), 3.28- 3.32 (m, 1H), 5.90 (s, 1H), 7.10- 7.16 (m, 3H), 7.20- 7.23 (m, 1H), 7.36- 7.39 (m, 2H), 7.66- 7.72 (m, 3H), 7.86 (d, *J* = 8.4 Hz, 1H).

**Single Crystal X-ray Diffraction**

Single crystal X-ray diffraction data were collected at 160.0(1) K on a Rigaku OD Synergy/Hypix diffractometer using the copper X-ray radiation (*l* = 1.54184 Å) from a dual wavelength X-ray source and an Oxford Instruments Cryojet XL cooler. The selected suitable single crystal was mounted using polybutene oil on a flexible loop fixed on a goniometer head and immediately transferred to the diffractometer. Pre-experiment, data collection, data

reduction and analytical absorption correction<sup>12</sup> were performed with the program suite *CrysAlisPro*.<sup>13</sup> Using *Olex2*,<sup>14</sup> the structure was solved with the *SHELXT*<sup>15</sup> small molecule structure solution program and refined with the *SHELXL* program package<sup>16</sup> by full-matrix least-squares minimization on  $F^2$ . *PLATON*<sup>17</sup> was used to check the result of the X-ray analysis. For more details about the data collection and refinement parameters, see the CIF file.

| <b>Table S1 Crystal data and structure refinement for 4m.</b> |                                                               |
|---------------------------------------------------------------|---------------------------------------------------------------|
| Empirical formula                                             | C <sub>26</sub> H <sub>24</sub> O <sub>3</sub>                |
| Formula weight                                                | 384.45                                                        |
| Temperature/K                                                 | 160.0(1)                                                      |
| Crystal system                                                | monoclinic                                                    |
| Space group                                                   | P2 <sub>1</sub> /n                                            |
| a/Å                                                           | 10.03740(10)                                                  |
| b/Å                                                           | 12.74610(10)                                                  |
| c/Å                                                           | 15.5693(2)                                                    |
| α/°                                                           | 90                                                            |
| β/°                                                           | 93.5670(10)                                                   |
| γ/°                                                           | 90                                                            |
| Volume/Å <sup>3</sup>                                         | 1988.04(4)                                                    |
| Z                                                             | 4                                                             |
| ρ <sub>calc</sub> /cm <sup>3</sup>                            | 1.284                                                         |
| μ/mm <sup>-1</sup>                                            | 0.657                                                         |
| F(000)                                                        | 816.0                                                         |
| Crystal size/mm <sup>3</sup>                                  | 0.2 × 0.12 × 0.09                                             |
| Radiation                                                     | Cu Kα (λ = 1.54184)                                           |
| 2θ range for data collection/°                                | 8.974 to 159.668                                              |
| Index ranges                                                  | -12 ≤ h ≤ 12, -9 ≤ k ≤ 15, -19 ≤ l ≤ 18                       |
| Reflections collected                                         | 24751                                                         |
| Independent reflections                                       | 4301 [R <sub>int</sub> = 0.0192, R <sub>sigma</sub> = 0.0151] |
| Data/restraints/parameters                                    | 4301/0/266                                                    |
| Goodness-of-fit on F <sup>2</sup>                             | 1.056                                                         |
| Final R indexes [I ≥ 2σ (I)]                                  | R <sub>1</sub> = 0.0340, wR <sub>2</sub> = 0.0845             |
| Final R indexes [all data]                                    | R <sub>1</sub> = 0.0357, wR <sub>2</sub> = 0.0859             |
| Largest diff. peak/hole / e Å <sup>-3</sup>                   | 0.26/-0.16                                                    |
| CCDC No.                                                      | 2307517                                                       |

| <b>Table S2 Crystal data and structure refinement for 3a.</b> |                                                |
|---------------------------------------------------------------|------------------------------------------------|
| Empirical formula                                             | C <sub>17</sub> H <sub>10</sub> O <sub>2</sub> |

|                                             |                                                               |
|---------------------------------------------|---------------------------------------------------------------|
| Formula weight                              | 246.25                                                        |
| Temperature/K                               | 160.0(1)                                                      |
| Crystal system                              | monoclinic                                                    |
| Space group                                 | P2 <sub>1</sub> /n                                            |
| a/Å                                         | 7.12120(10)                                                   |
| b/Å                                         | 12.50200(10)                                                  |
| c/Å                                         | 12.82470(10)                                                  |
| α/°                                         | 90                                                            |
| β/°                                         | 95.5510(10)                                                   |
| γ/°                                         | 90                                                            |
| Volume/Å <sup>3</sup>                       | 1136.42(2)                                                    |
| Z                                           | 4                                                             |
| ρ <sub>calc</sub> /g/cm <sup>3</sup>        | 1.439                                                         |
| μ/mm <sup>-1</sup>                          | 0.754                                                         |
| F(000)                                      | 512.0                                                         |
| Crystal size/mm <sup>3</sup>                | 0.13 × 0.09 × 0.03                                            |
| Radiation                                   | Cu Kα (λ = 1.54184)                                           |
| 2θ range for data collection/°              | 9.904 to 159.026                                              |
| Index ranges                                | -8 ≤ h ≤ 9, -15 ≤ k ≤ 15, -16 ≤ l ≤ 11                        |
| Reflections collected                       | 13198                                                         |
| Independent reflections                     | 2461 [R <sub>int</sub> = 0.0160, R <sub>sigma</sub> = 0.0144] |
| Data/restraints/parameters                  | 2461/0/173                                                    |
| Goodness-of-fit on F <sup>2</sup>           | 1.097                                                         |
| Final R indexes [I ≥ 2σ (I)]                | R <sub>1</sub> = 0.0339, wR <sub>2</sub> = 0.1013             |
| Final R indexes [all data]                  | R <sub>1</sub> = 0.0363, wR <sub>2</sub> = 0.1034             |
| Largest diff. peak/hole / e Å <sup>-3</sup> | 0.24/-0.15                                                    |
| CCDC No.                                    | 2307516                                                       |

### Molecular docking analysis

We performed molecular docking analysis of four drug targets of which three of them are cancer targets (epidermal growth factor receptor, EGFR; cyclin-dependent kinase-6, CDK6 and cyclin-dependent kinase-4, CDK-4 and α-glucosidase from *Saccharomyces cerevisiae*. The 3D-structures of the former three targets (EGFR: 3W2S; CDK-6: 6OQO; CDK-4: 7SJ3) were retrieved from the protein data bank, while the latter target was obtained from ALPHA-FOLD

predicted model in the Uniprot database. The protein structures and the synthesized compounds] were prepared using the protein preparation wizard<sup>18</sup> and ligprep module of Schrödinger suite 2021-3, respectively.<sup>19</sup> The OPLS-4 force field<sup>20</sup> was used for small molecules and protein targets. The receptor grid for each protein target has been constructed using the position of the ligand molecule complexed in these protein targets. After defining active site, the flexible ligand docking was performed using Glide XP mode<sup>21</sup> to predict the best orientation at the binding pocket of the target protein. The protein-ligand interaction analysis for the best pose was carried out using the PLIP web tool.<sup>22</sup>

**Table S3.** Glide XP docking score (in kcal mol<sup>-1</sup>)

| S. No | Compound No | EGFR   | CDK6   | CDK4   | $\alpha$ -Glucosidase |
|-------|-------------|--------|--------|--------|-----------------------|
| 1     | <b>4a</b>   | -5.169 | -4.377 | -3.680 | -4.812                |
| 2     | <b>4b</b>   | -5.614 | -2.875 | -2.384 | -2.227                |
| 3     | <b>4c</b>   | -5.419 | -2.918 | -2.085 | -5.075                |
| 4     | <b>4d</b>   | -4.901 | -3.138 | -3.536 | -2.898                |
| 5     | <b>4e</b>   | -4.807 | -2.223 | -4.939 | -2.340                |
| 6     | <b>4f</b>   | -4.782 | -3.178 | -2.441 | -2.568                |
| 7     | <b>4g</b>   | -4.922 | -3.353 | -2.444 | -2.710                |
| 8     | <b>4i</b>   | -5.112 | -1.586 | -2.431 | -5.611                |
| 9     | <b>4j</b>   | -5.559 | -3.297 | -6.182 | -6.558                |
| 10    | <b>4k</b>   | -5.310 | -2.550 | -3.615 | -5.620                |
| 11    | <b>4l</b>   | -6.279 | -4.108 | -3.354 | -4.222                |
| 12    | <b>4n</b>   | -4.886 | -3.078 | -3.794 | -5.777                |
| 13    | <b>4m</b>   | -5.037 | -3.026 | -5.010 | -5.387                |
| 14    | <b>4p</b>   | -2.606 | -4.115 | -2.180 | -6.485                |
| 15    | <b>4q</b>   | -3.676 | -3.599 | -1.602 | -5.666                |
| 16    | <b>4r</b>   | -5.195 | -5.396 | -2.571 | -5.309                |



|    |            |         |        |         |       |
|----|------------|---------|--------|---------|-------|
| 17 | <b>W2R</b> | -14.337 |        |         |       |
| 18 | <b>N1J</b> |         | -9.298 |         |       |
| 19 | <b>6ZV</b> |         |        | -12.017 |       |
| 20 | <b>GLU</b> |         |        |         | -8.24 |

## References

- 1) Mohit L. D.; Choitanya Dev P.; Paran J. B.; Pranjali K. B. *Tetrahedron Lett.* **2016**, *57*, 5479-5483.
- 2) Jianjun Li.; Wenyuan Tang.; Linmei Lu.; WeiKe Su. *Tetrahedron Lett.* **2008**, *49*, 7117-7120.
- 3) Samin S.; Mostafa G.; Faezeh T. *Polycycl Aromat Compd.* **2020**, *40*, 1127-1142.
- 4) Moosavi-Zare. A. R.; Mohammad Ali. Z.; Mahmoud Zarei.; Abdolkarim Z.; Vahid Khakyzadeh. *J. Mol. Liq.* **2015**, *211*, 373-380.
- 5) Agrwal. A.; Kumar. V.; Kasana. V. *J. Iran. Chem. Soc.* **2021**, *18*, 2583-2593.
- 6) Mohamadpour Farzaneh. *OPPI.* **2022**, *55*, 317-325.
- 7) Tamrat Yimenu Z.; Kadir Turhan.; Zuhail Turgut. *American Chemical Science Journal.* **2016**, *13*, 01-08.
- 8) Fareghi-Alamdari R.; Golestanzadeh M.; Agend F.; Zekri N. *C. R. Chimie.* **2013**, *16*, 878-887.
- 9) Mitter, B.; Saharia, C. S. *Vikram Univ.* **1958**, *2*, 143-147
- 10) Jiacheng Z.; Meichao L.; Tianci L.; Chunmei L.; Xinquan H.; Liquan Jin.; Nan Sun.; Baoxiang H.; Zhenlu S. *Tetrahedron*, **2021**, *82*, 131947.
- 11) Beeley.; Nigel Robert.; Arnold. *International application published under the patent cooperation treaty.* **2016**, WO 2016/209619 A1.
- 12) Clark, R. C.; Reid, J. S. *Acta Cryst. A* **1995**, *51*, 887.
- 13) *CrysAlisPro* (version 1.171.42.100a), Rigaku Oxford Diffraction Ltd, Yarnton, Oxfordshire, England, **2022**.
- 14) Dolomanov, O. V.; Bourhis, L. J.; Gildea, R. J.; Howard, J. A. K.; Puschmann, H. *J. Appl. Cryst.* **2009**, *42*, 339-341.
- 15) Sheldrick, G. M. "SHELXT - Integrated space-group and crystal-structure determination" - *Acta Cryst. A* **2015**, *71*, 3-8.
- 16) Sheldrick, G. M. "Crystal structure refinement with SHELXL" - *Acta Cryst. C* **2015**, *71*, 3.
- 17) Spek, A. L. "Structure validation in chemical crystallography" - *Acta Cryst. D* **2009**, *65*, 148-155.

- 18) Sastry, G.M.; Adzhigirey, M.; Day, T.; Annabhimoju, R.; Sherman, W. *J. Comput. Aid. Mol. Des.*, **2013**, *27*, 221-234.
- 19) Schrödinger Release 2023-2: LigPrep, Schrödinger, LLC, New York, NY, 2023.
- 20) Lu, C.; Wu, C.; Ghoreishi, D.; Chen, W.; Wang, L.; Damm, W.; Ross, G. A.; Dahlgren, M. K.; Russell, E.; Von Bargen, C. D.; Abel, R.; Friesner, R. A.; Harder, E. D. *Journal of Chemical Theory and Computation*, 2021, *17*, 4291–4300.
- 21) Friesner, R. A.; Murphy, R. B.; Repasky, M. P.; Frye, L. L.; Greenwood, J. R.; Halgren, T. A.; Sanschagrin, P. C.; Mainz, D. T. Extra Precision Glide: Docking and Scoring Incorporating a Model of Hydrophobic Enclosure for Protein–Ligand Complexes. *J. Med. Chem.* 2006, *49*, 6177–6196.
- 22) Adasme, M. F.; Linnemann, K. L.; Bolz, S. N.; Kaiser, F.; Salentin, S.; Haupt, V. J.; Schroeder, M. PLIP 2021: Expanding the Scope of the Protein–Ligand Interaction Profiler to DNA and RNA. *Nucleic Acids Research*, 2021, *49*, W530–W534.
23. Goudarziafsher, M.; Reza Moosavi-Zare, A.; Khazael, E. One-Pot Three-Component Synthesis of 1-( $\alpha$ -Aminoalkyl)-2-Naphthols Using Nano-[Ni-4MSP](NO<sub>3</sub>)<sub>2</sub> as a New Catalyst. *Polycycl. Aromat. comp.* 2022, *42*, 3606-3621.

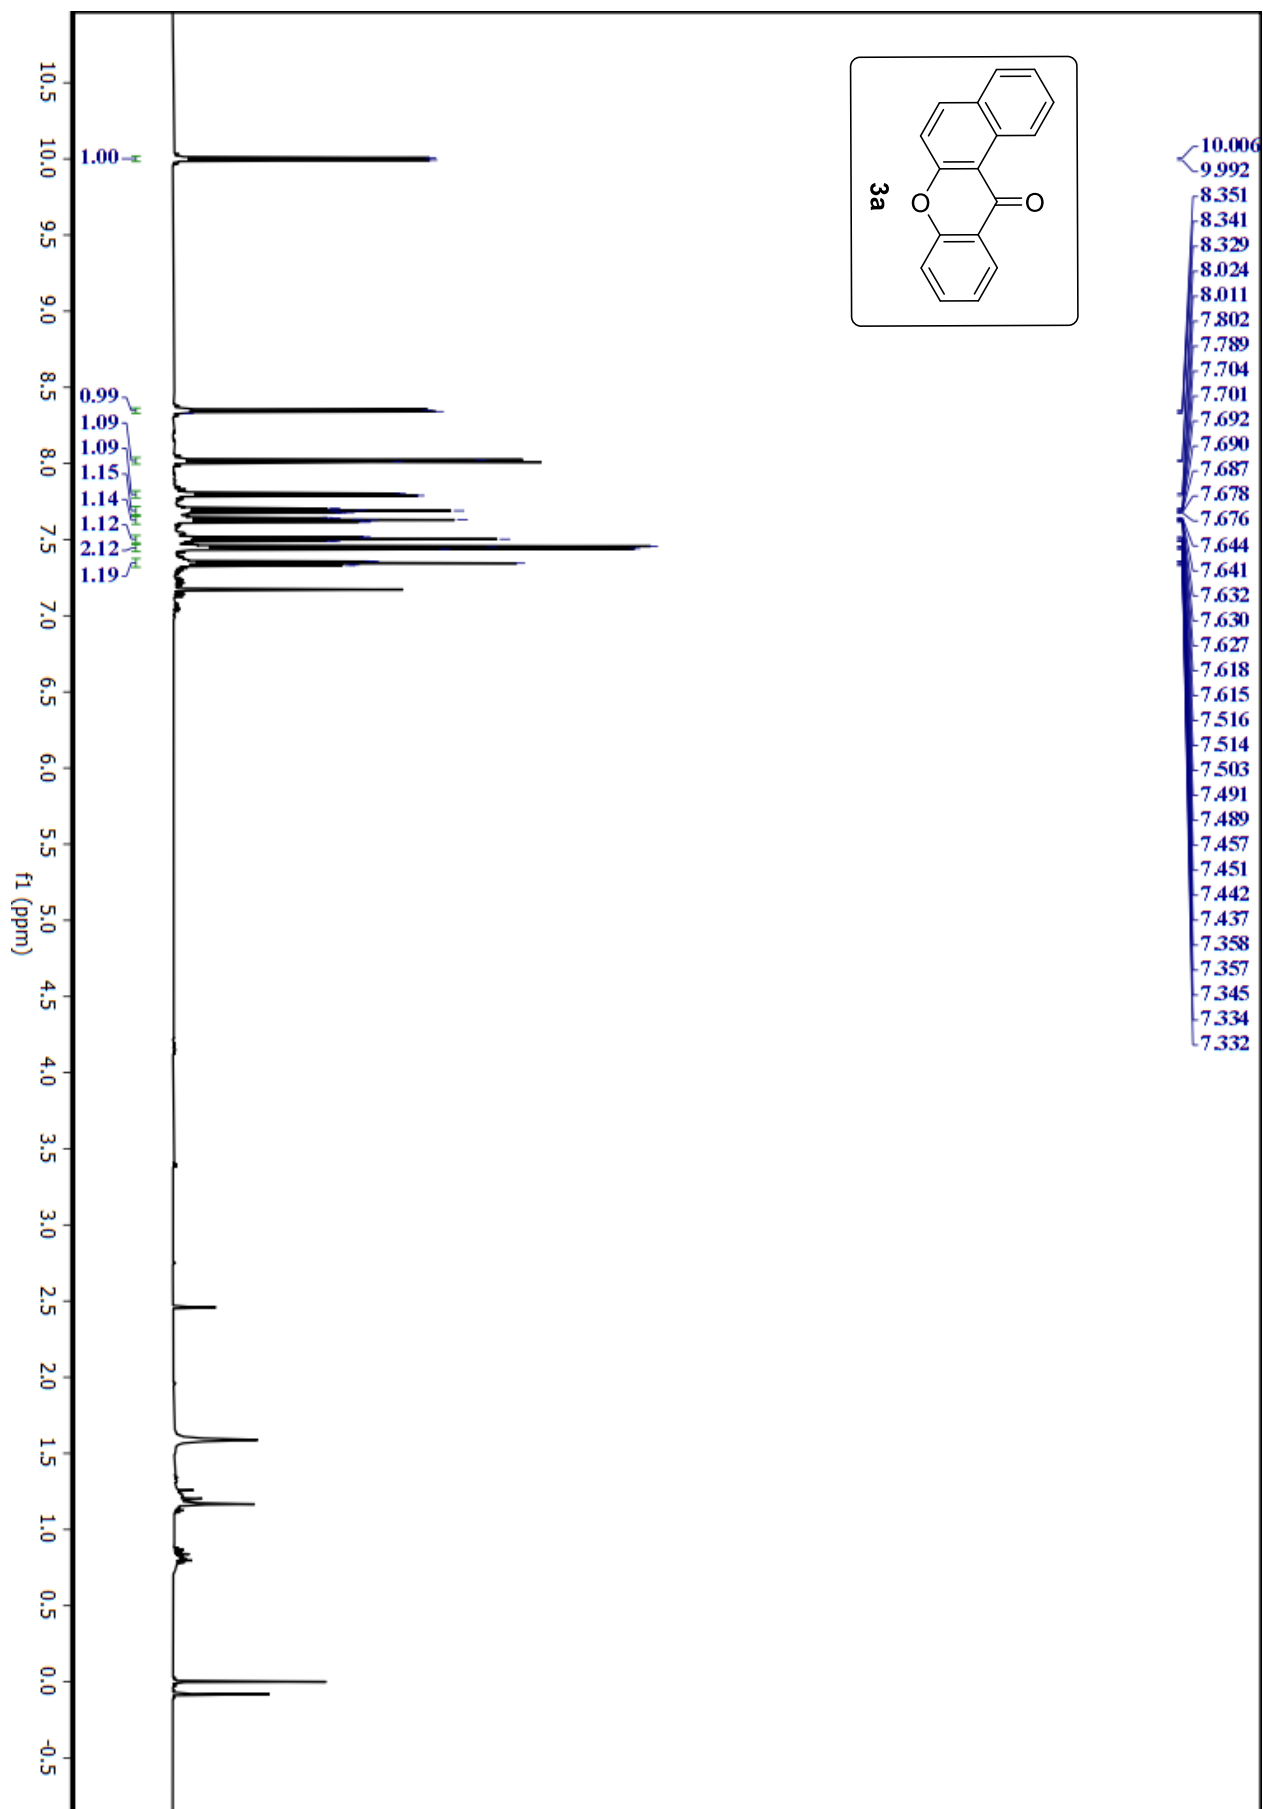

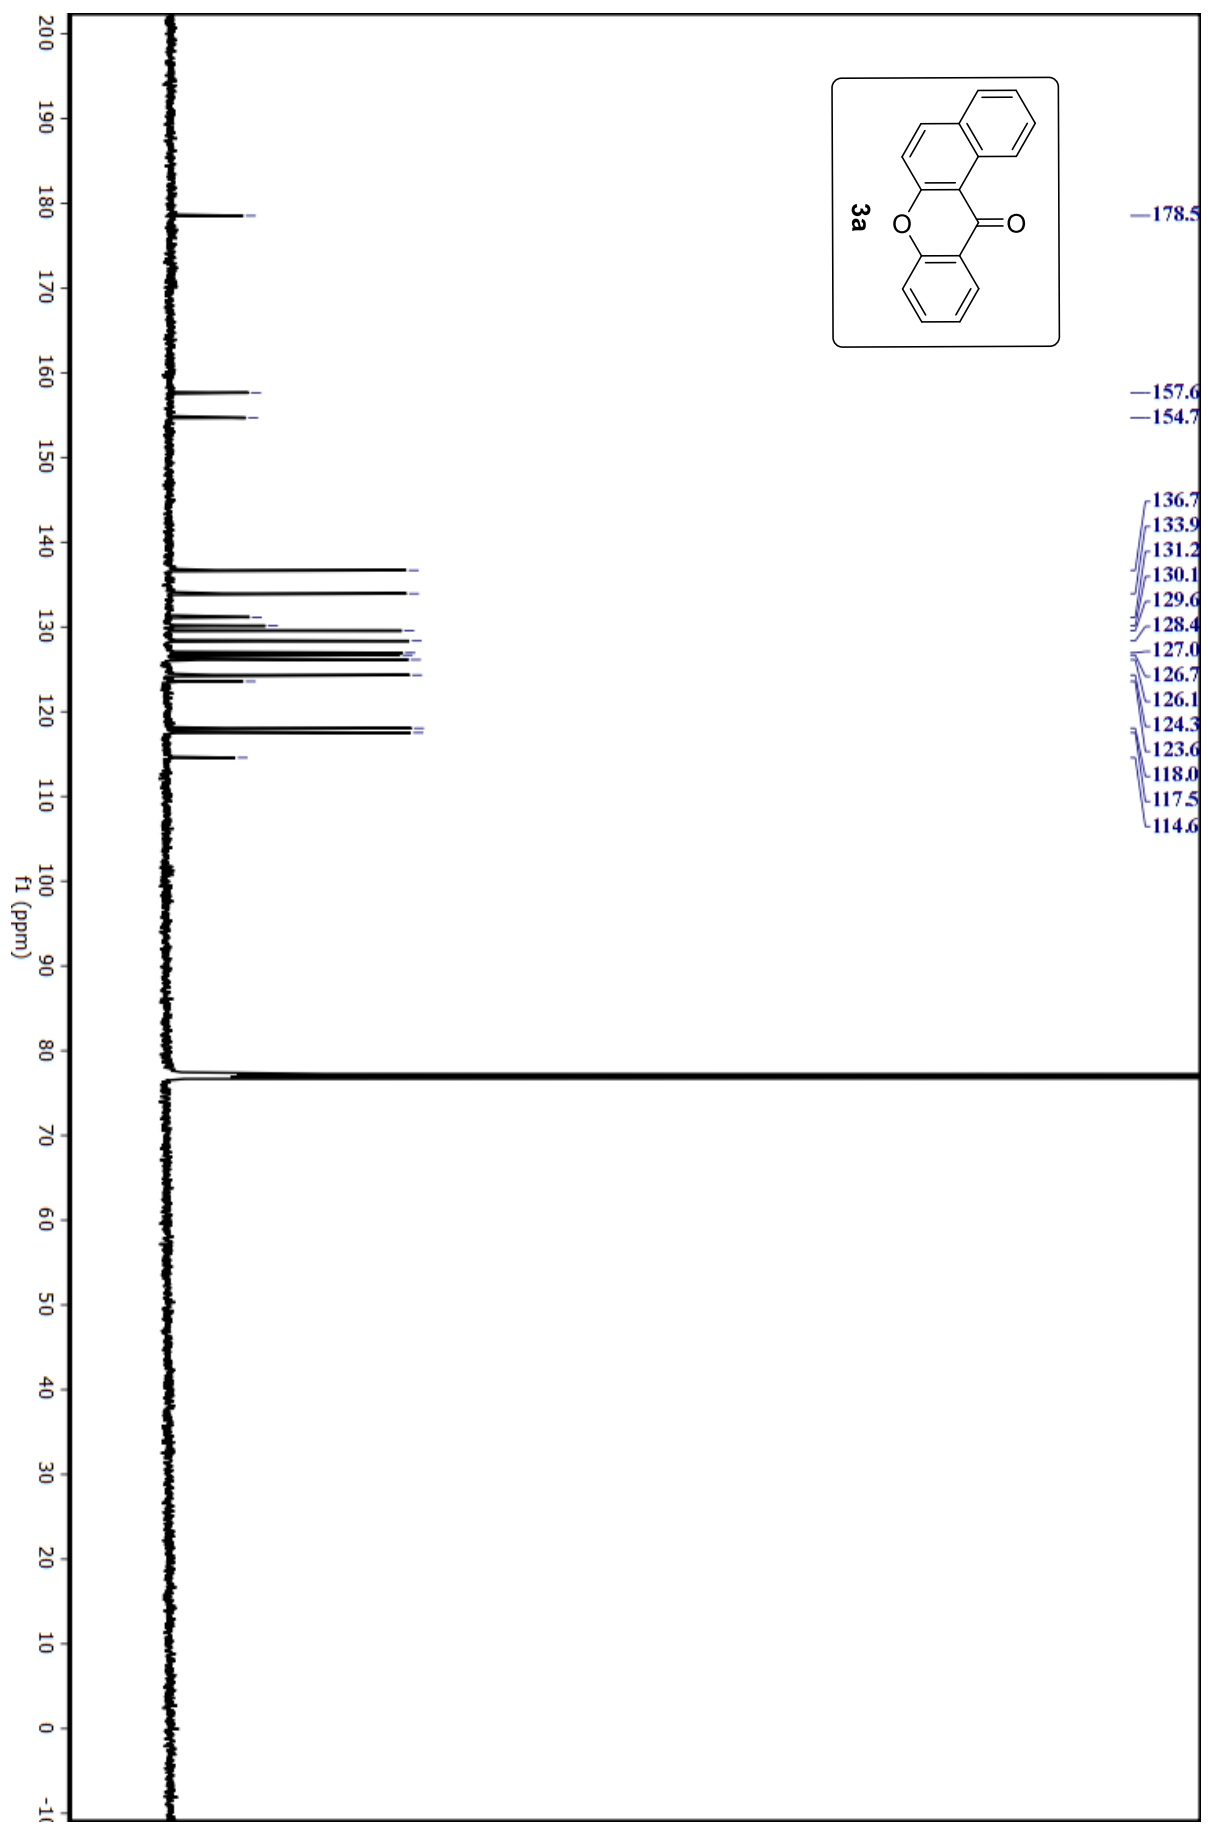

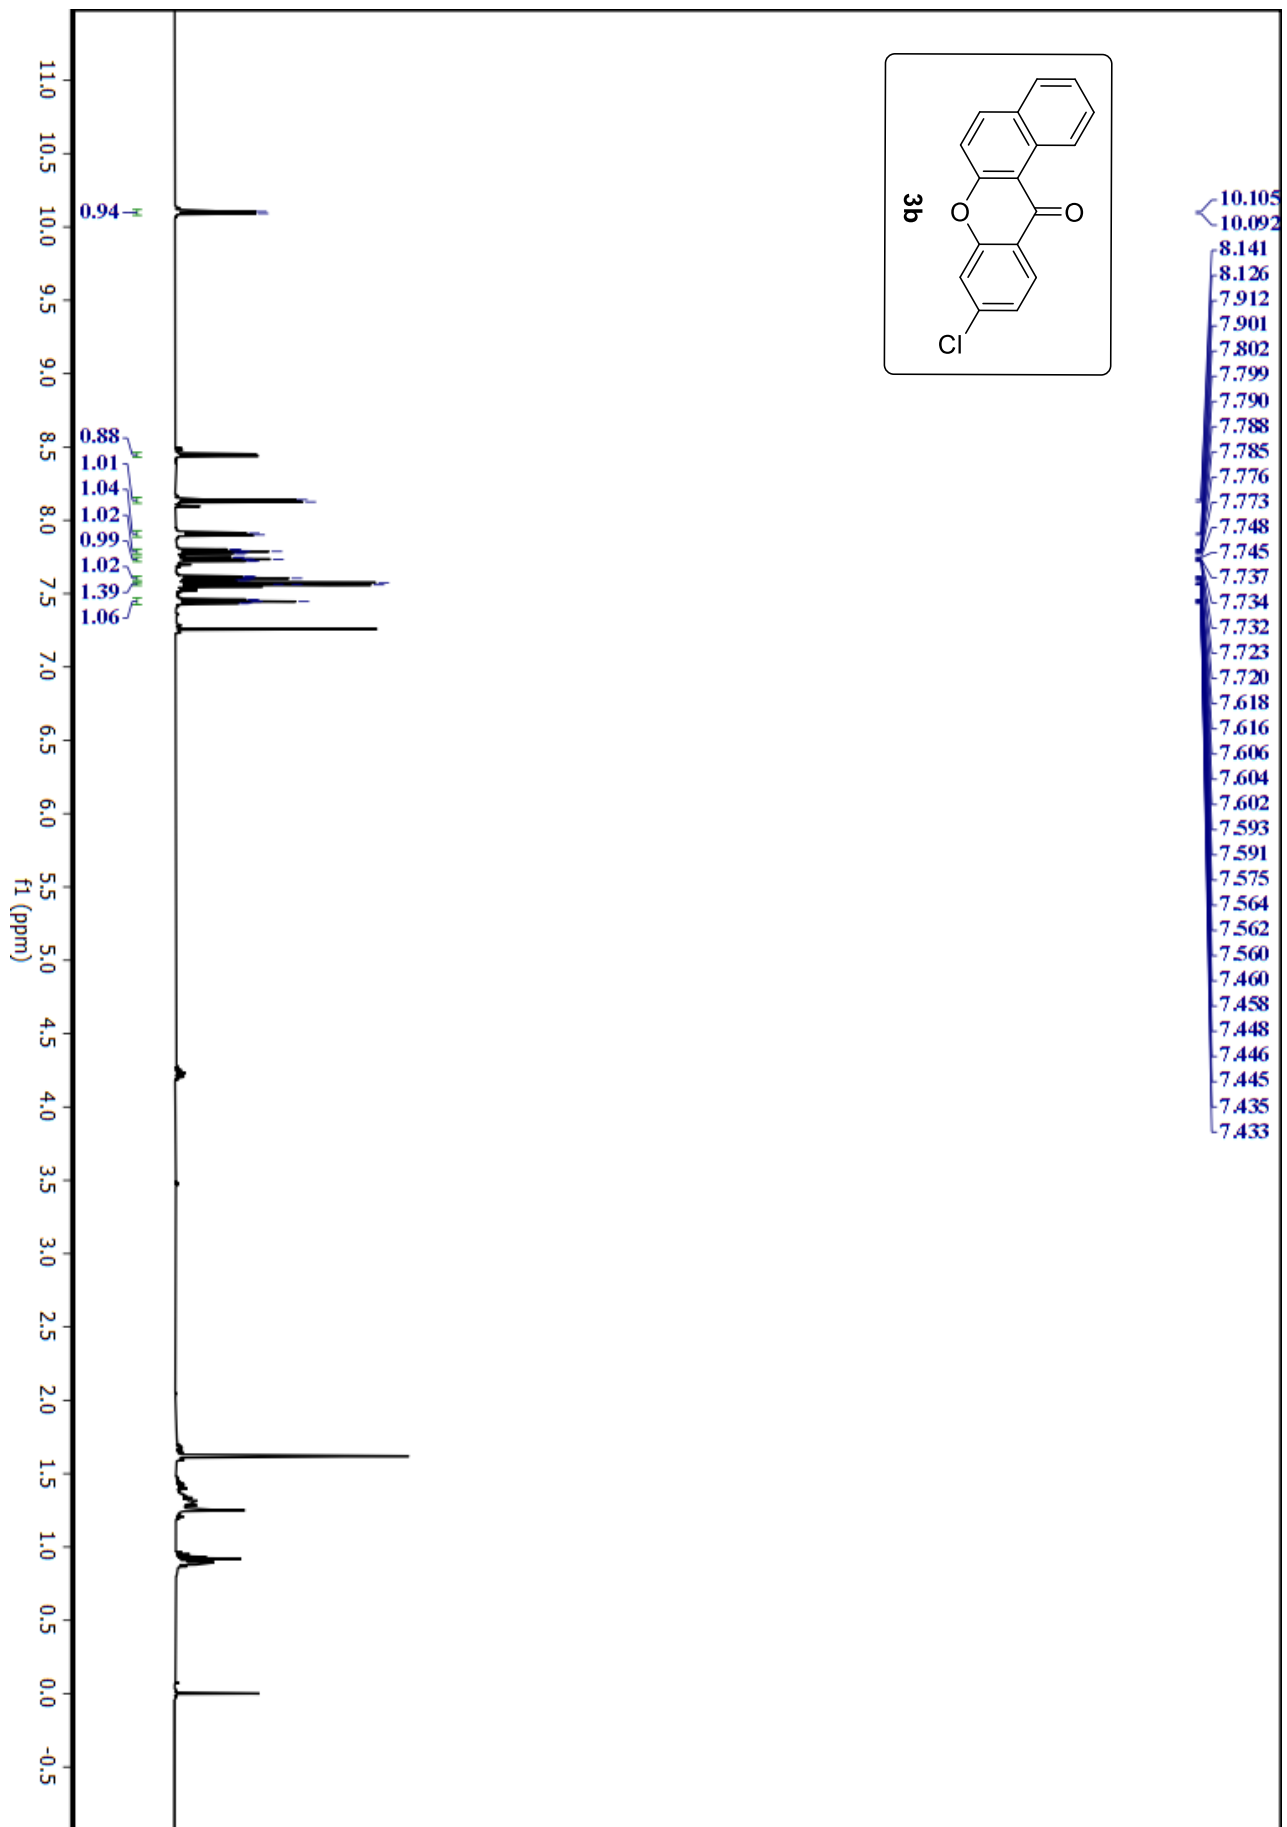

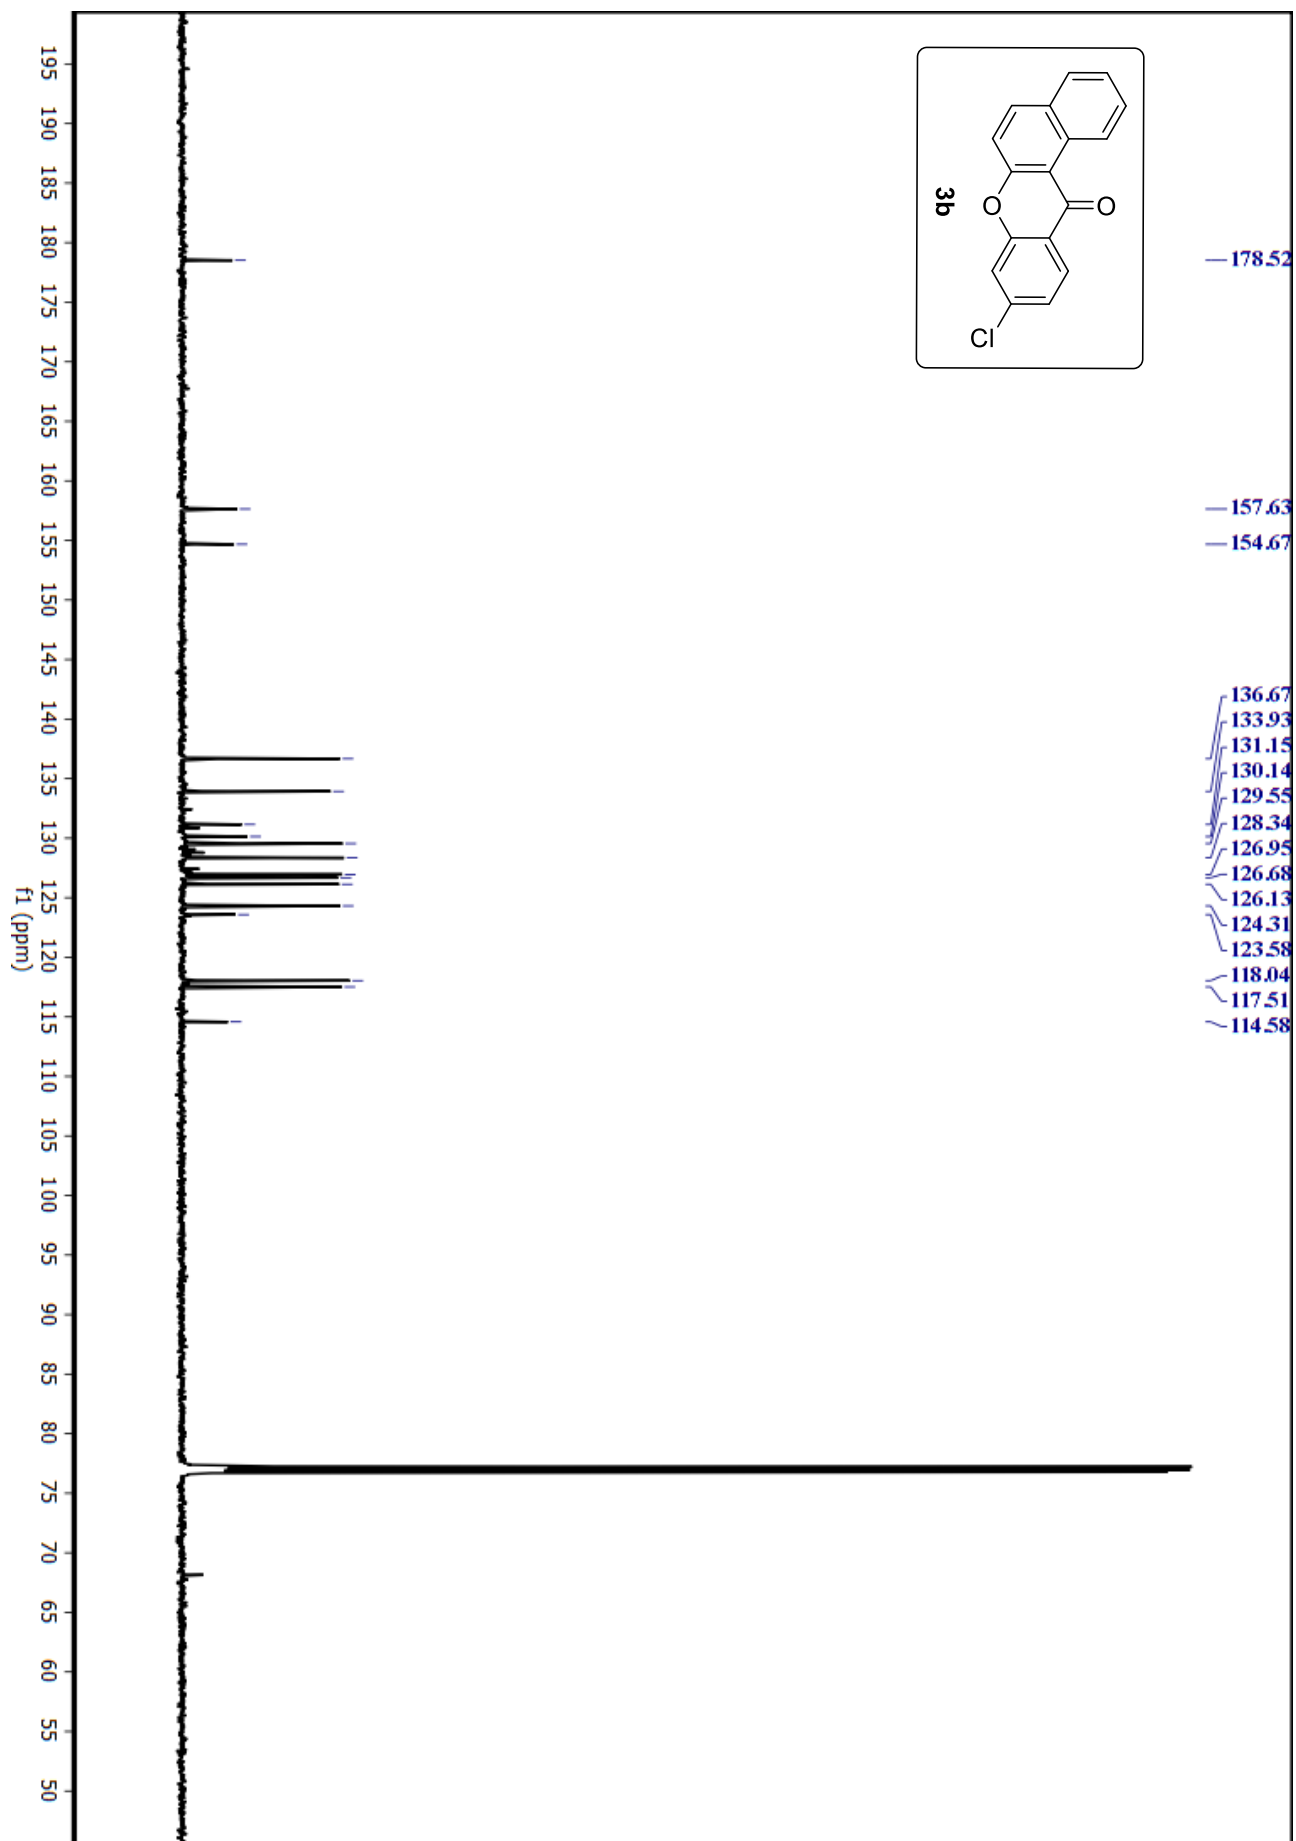

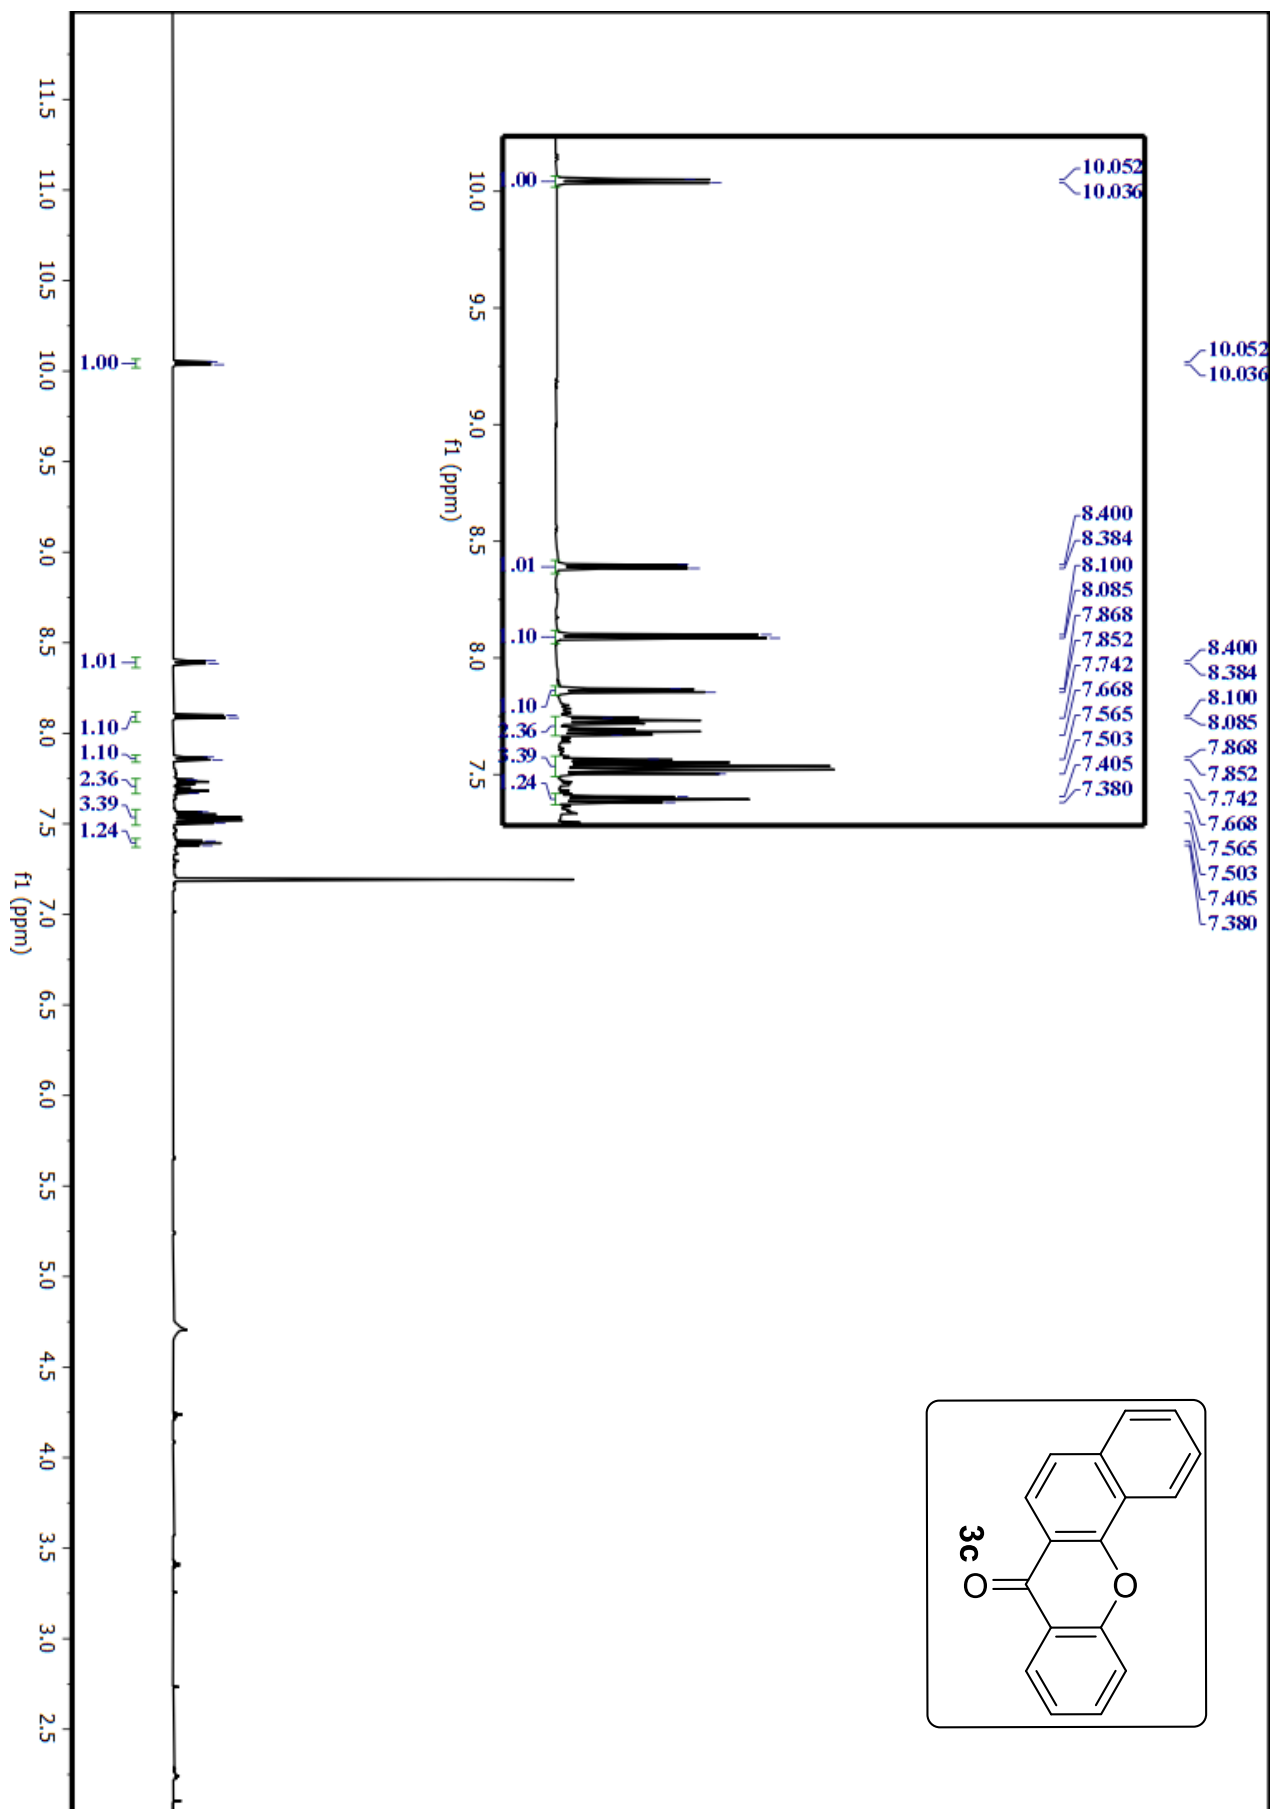



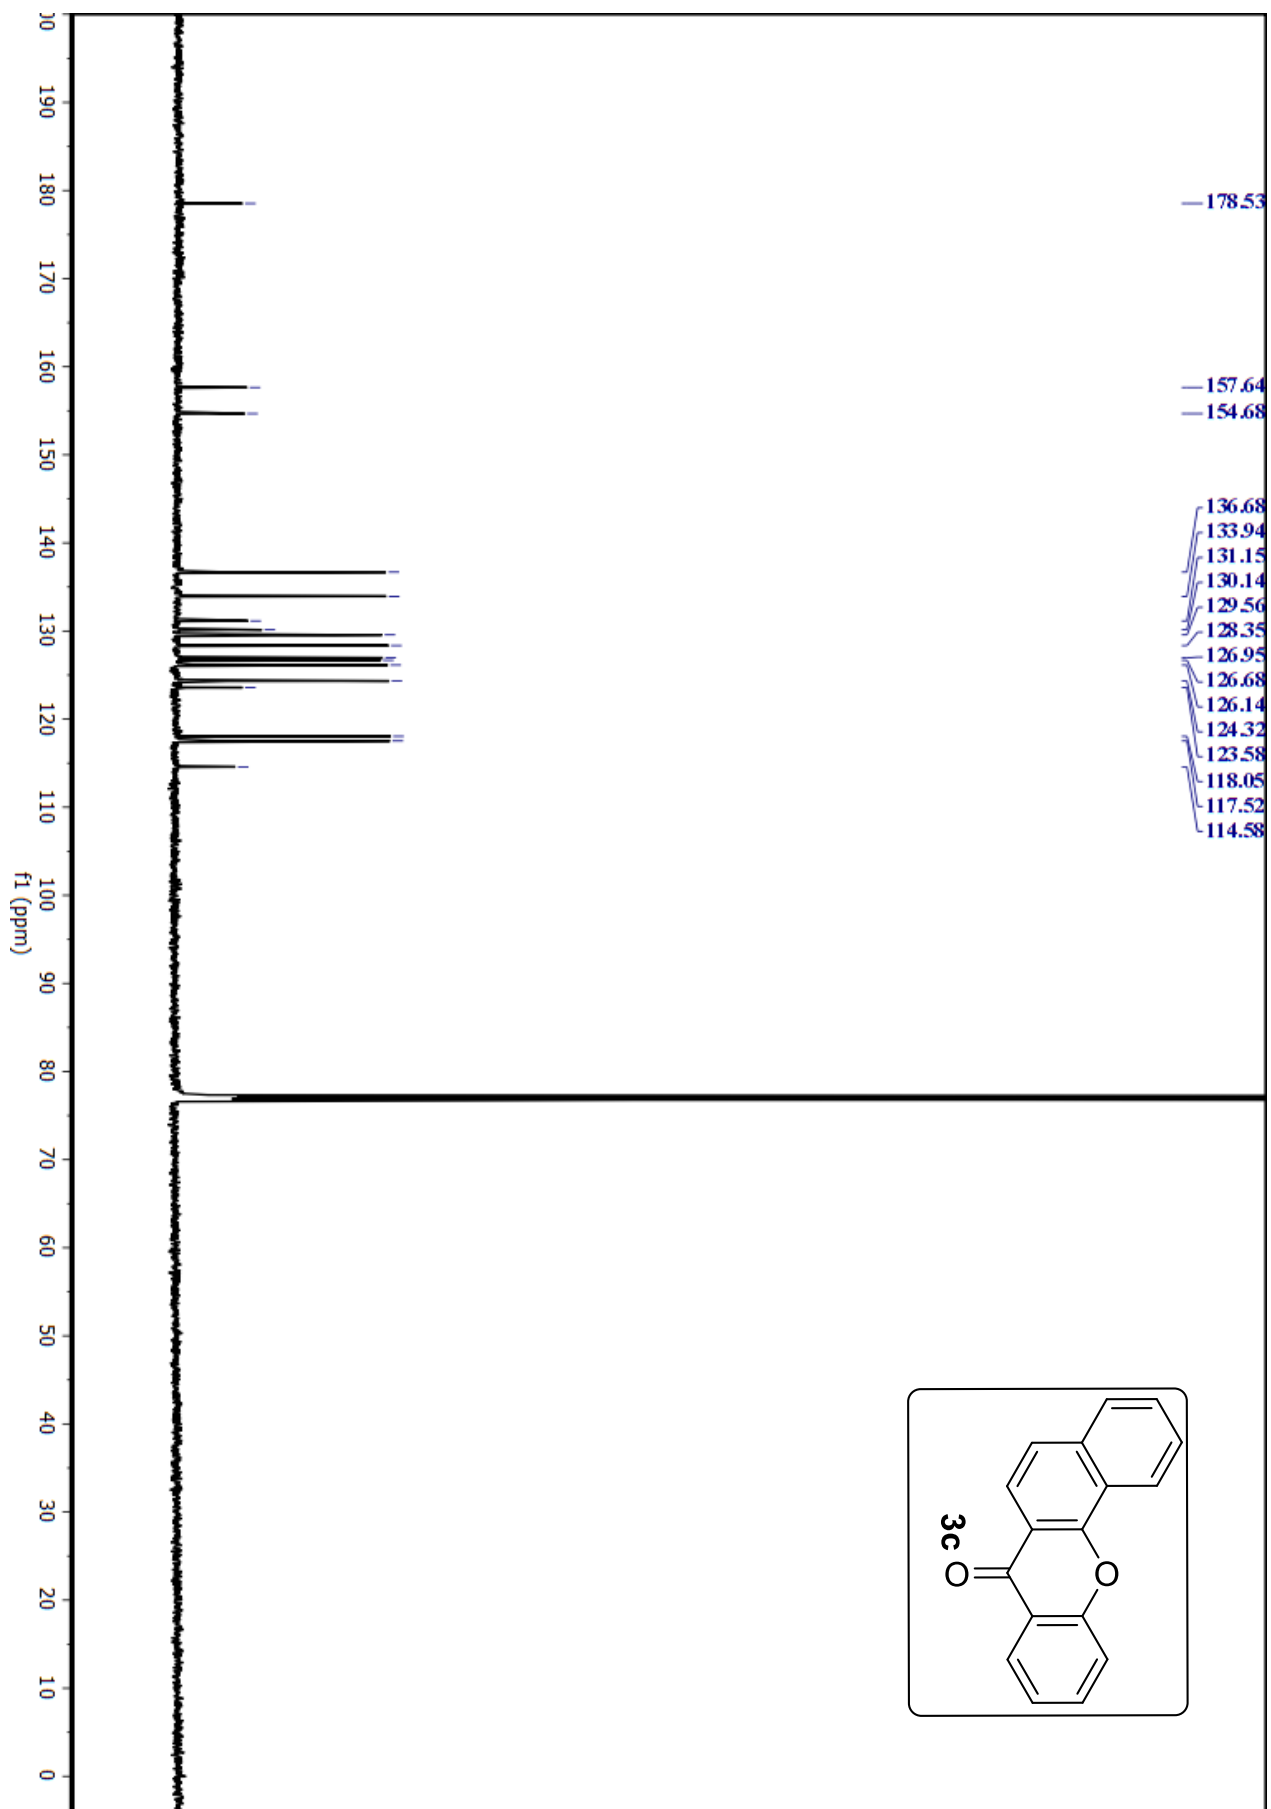

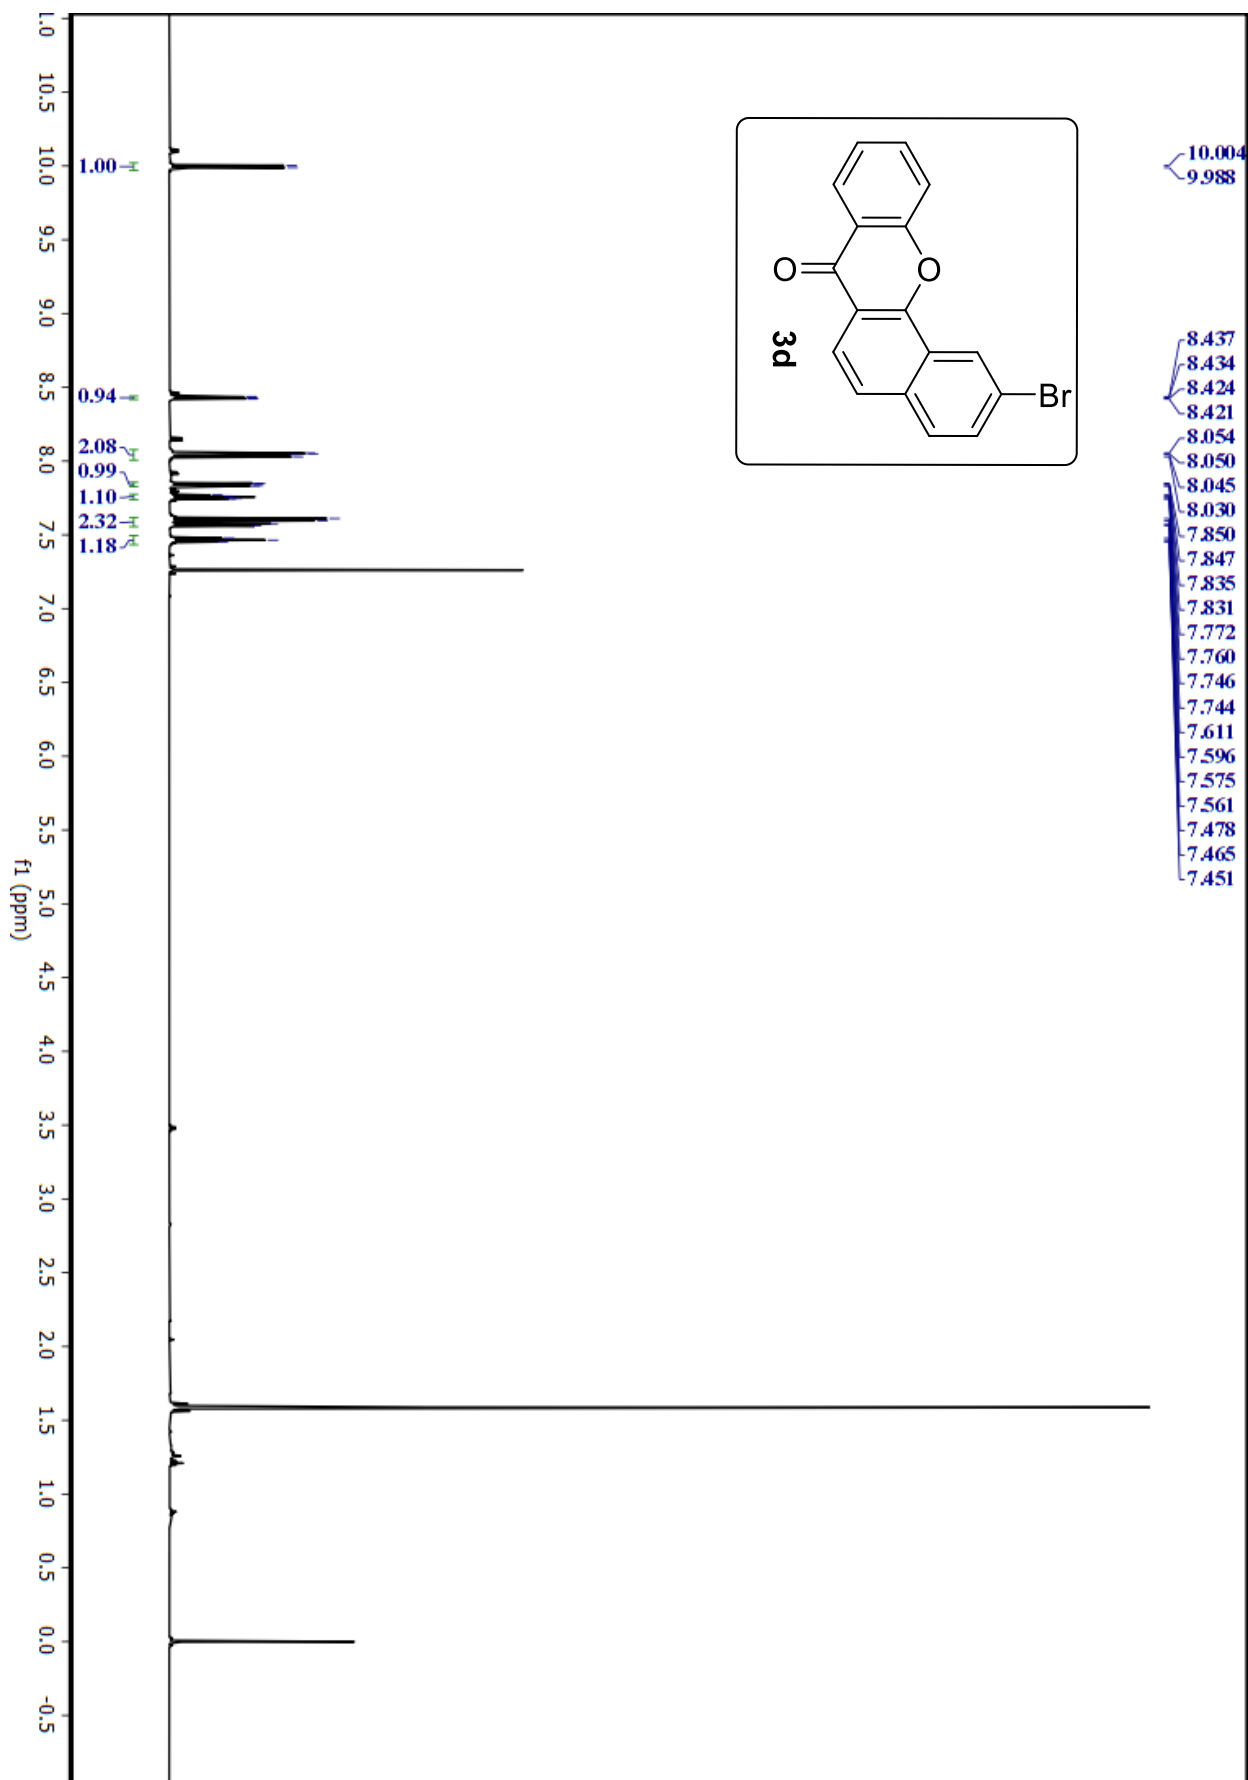

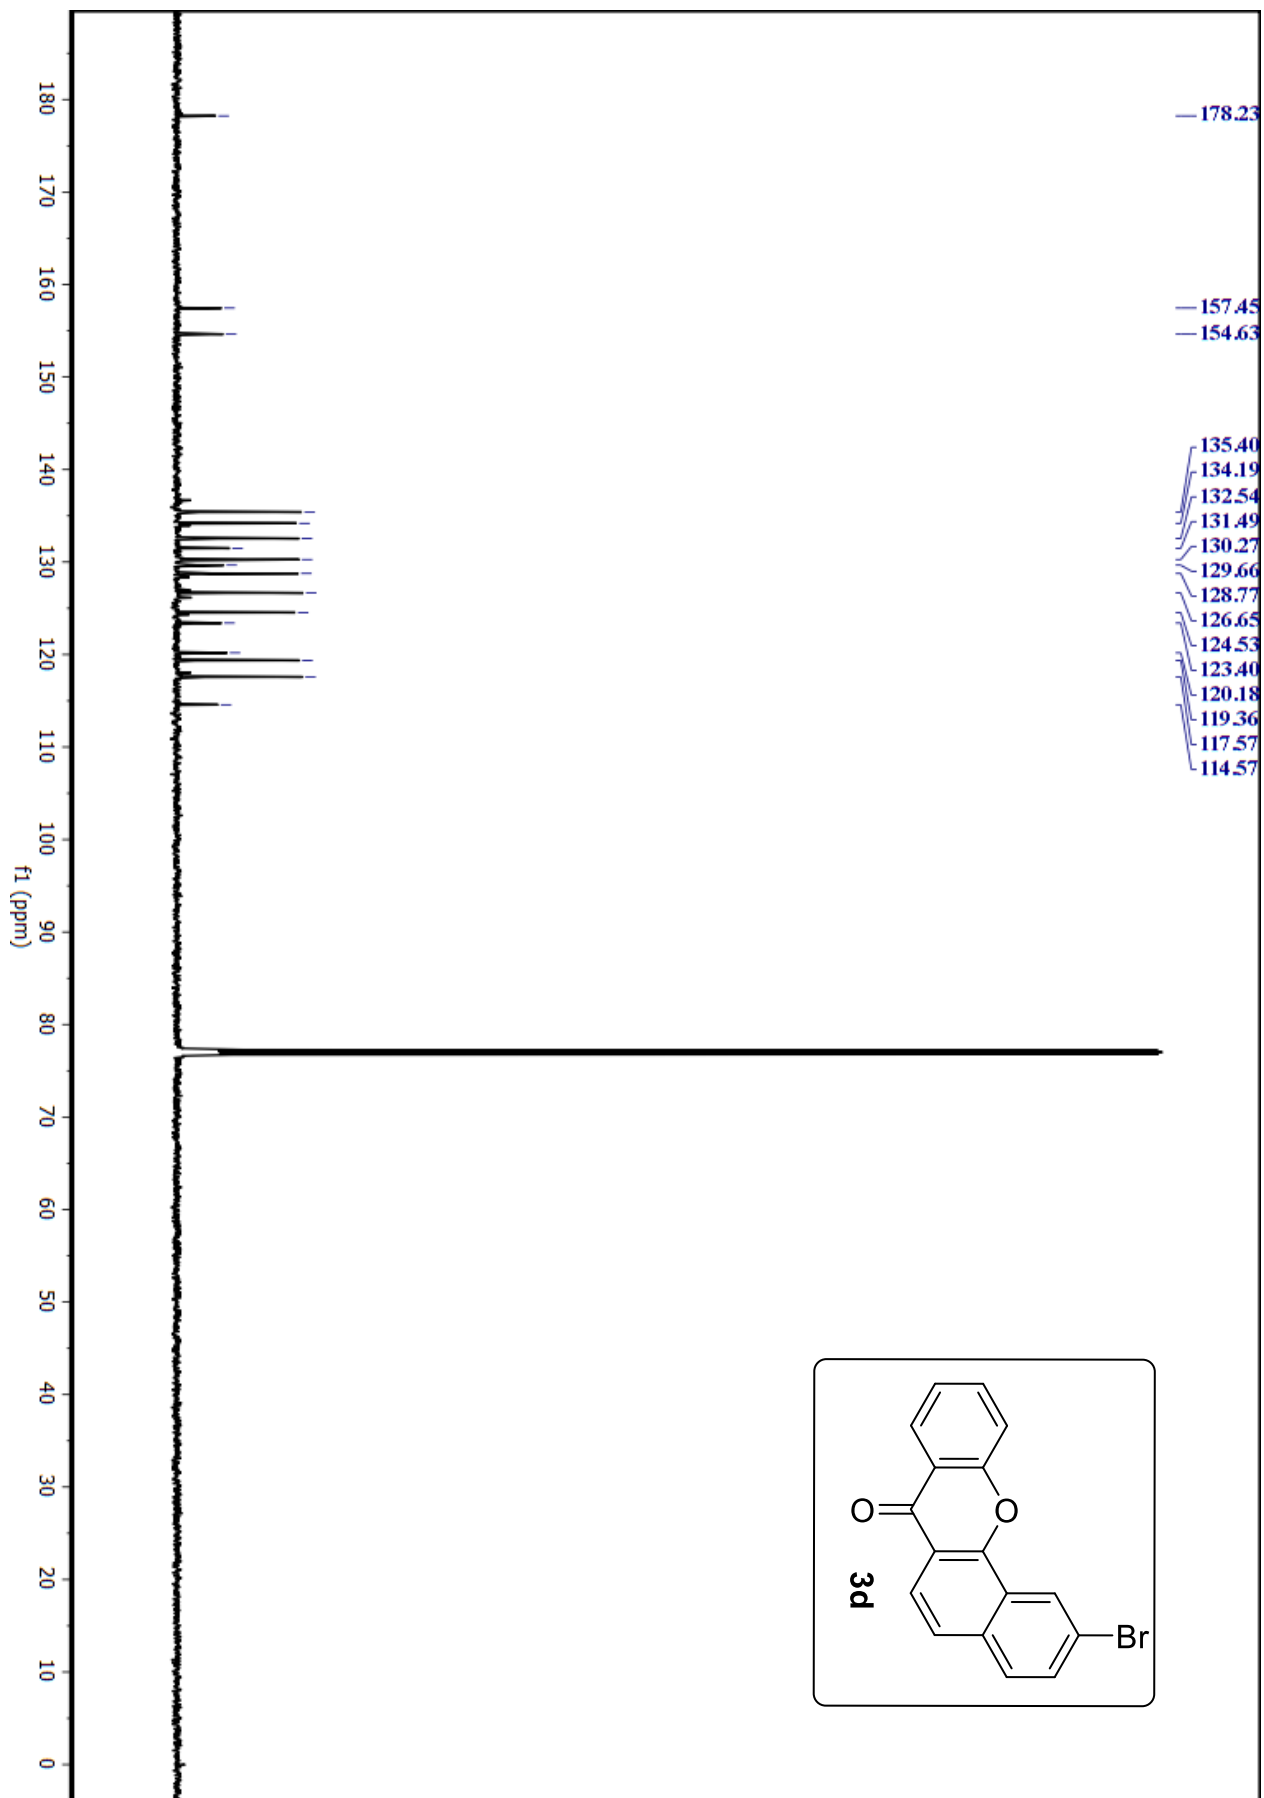

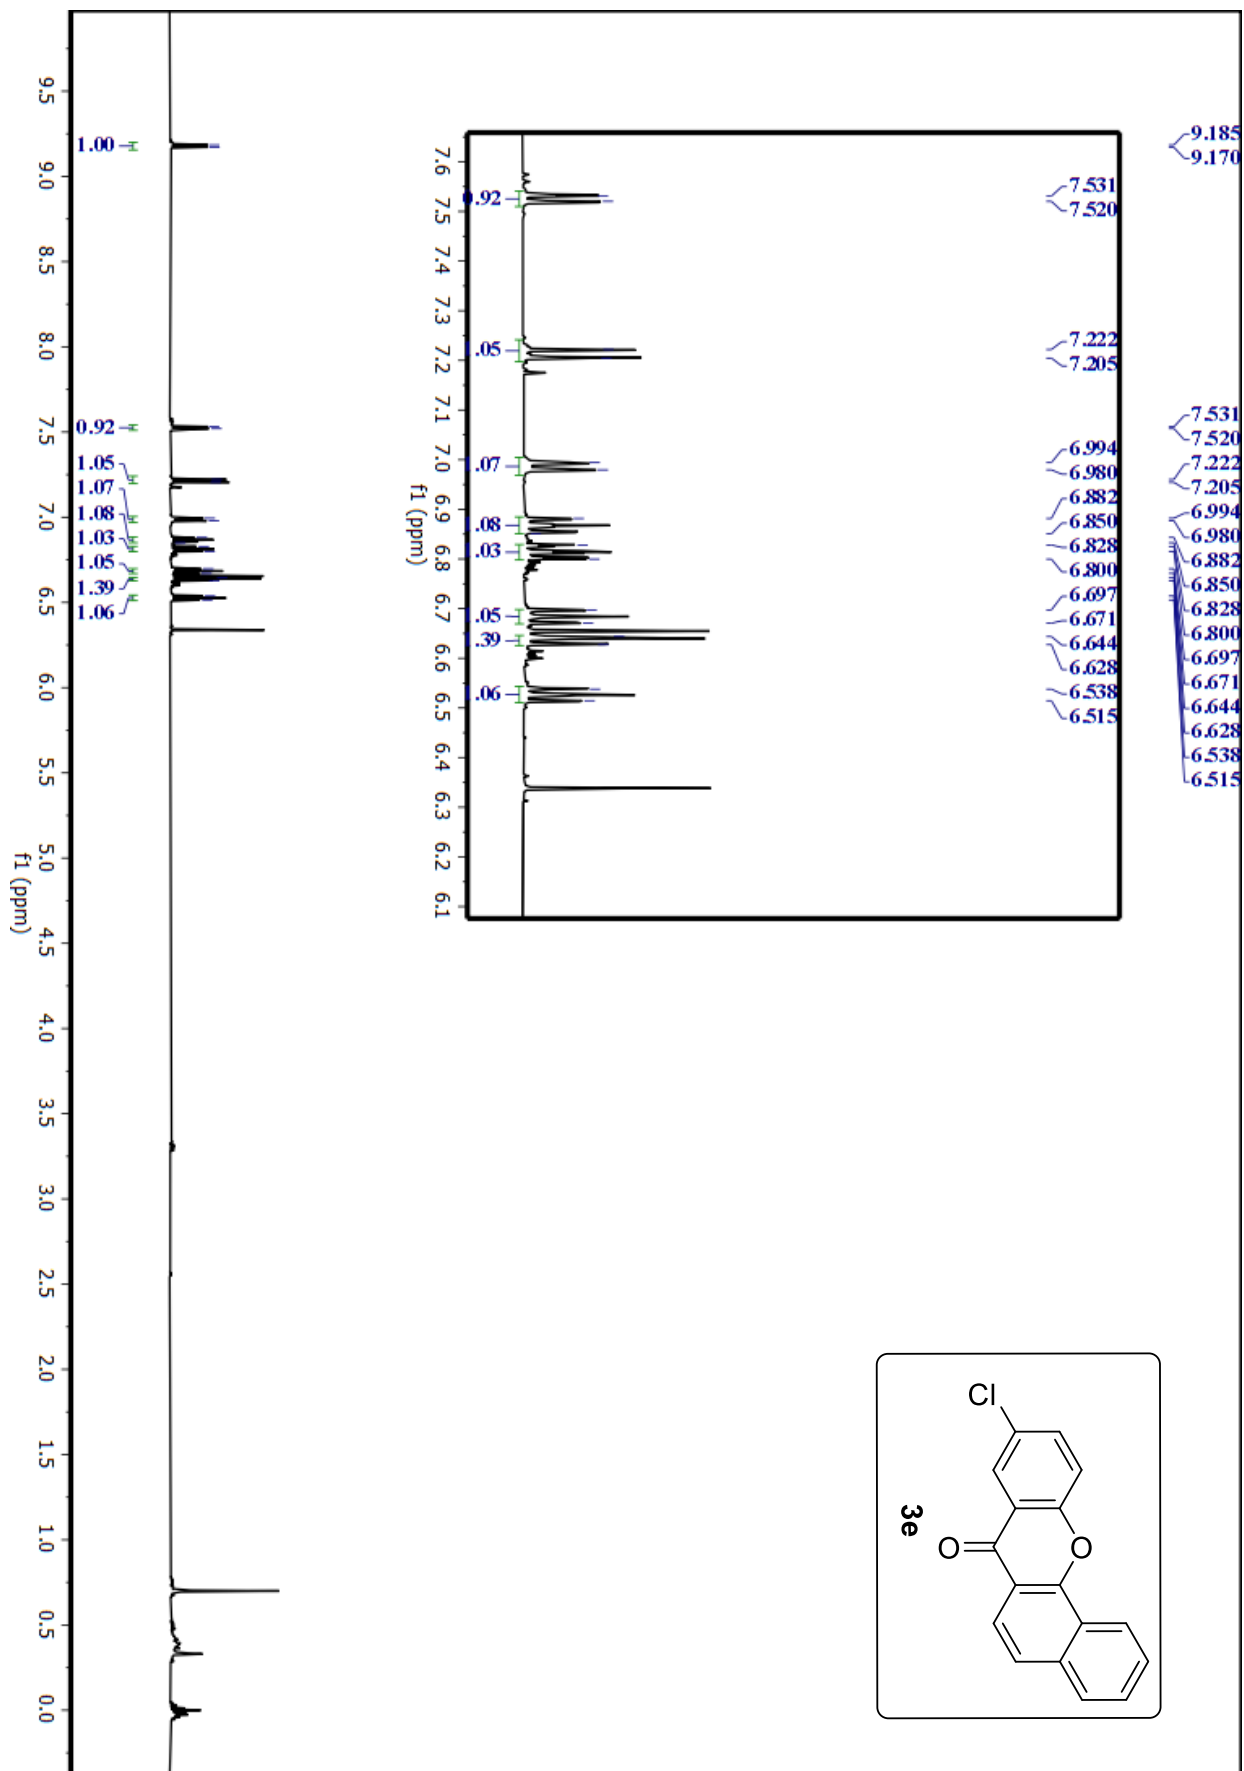

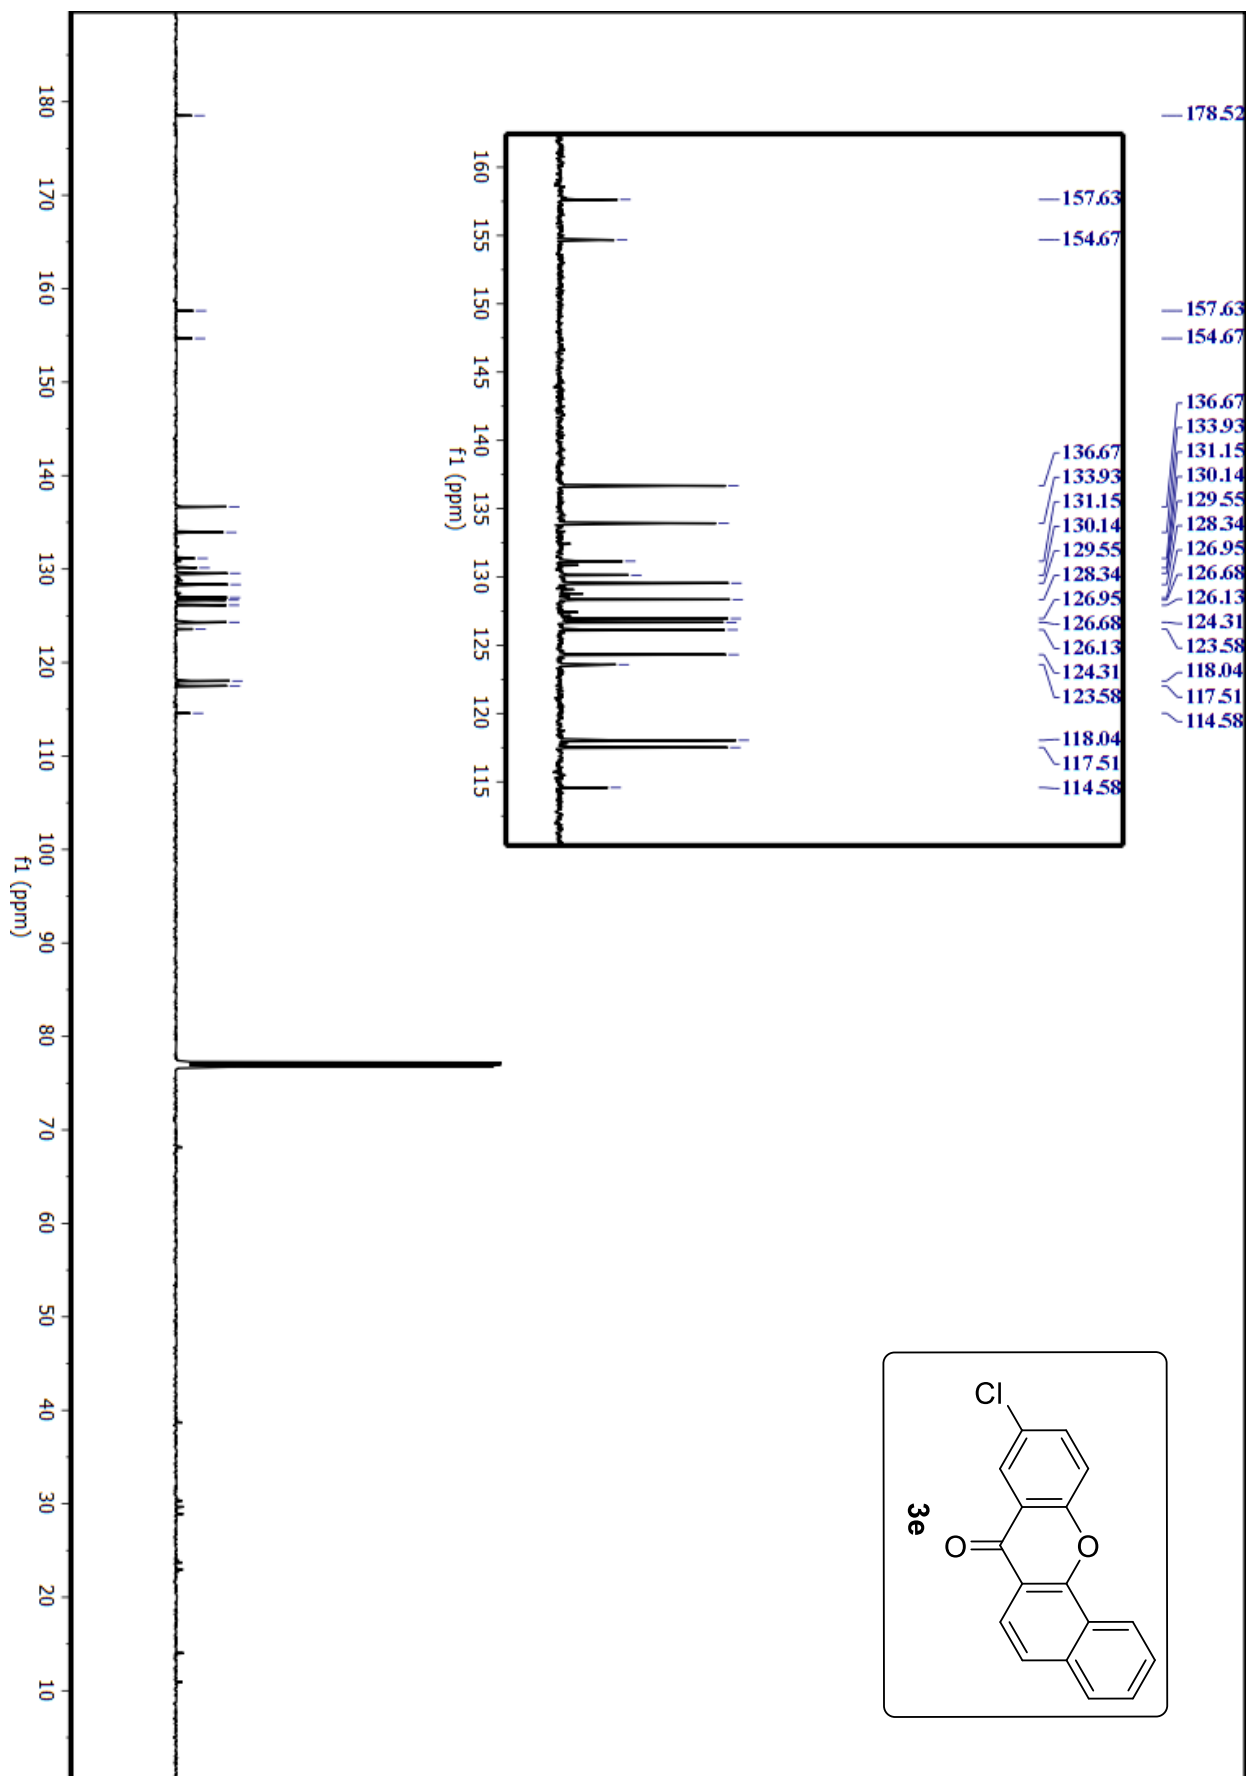

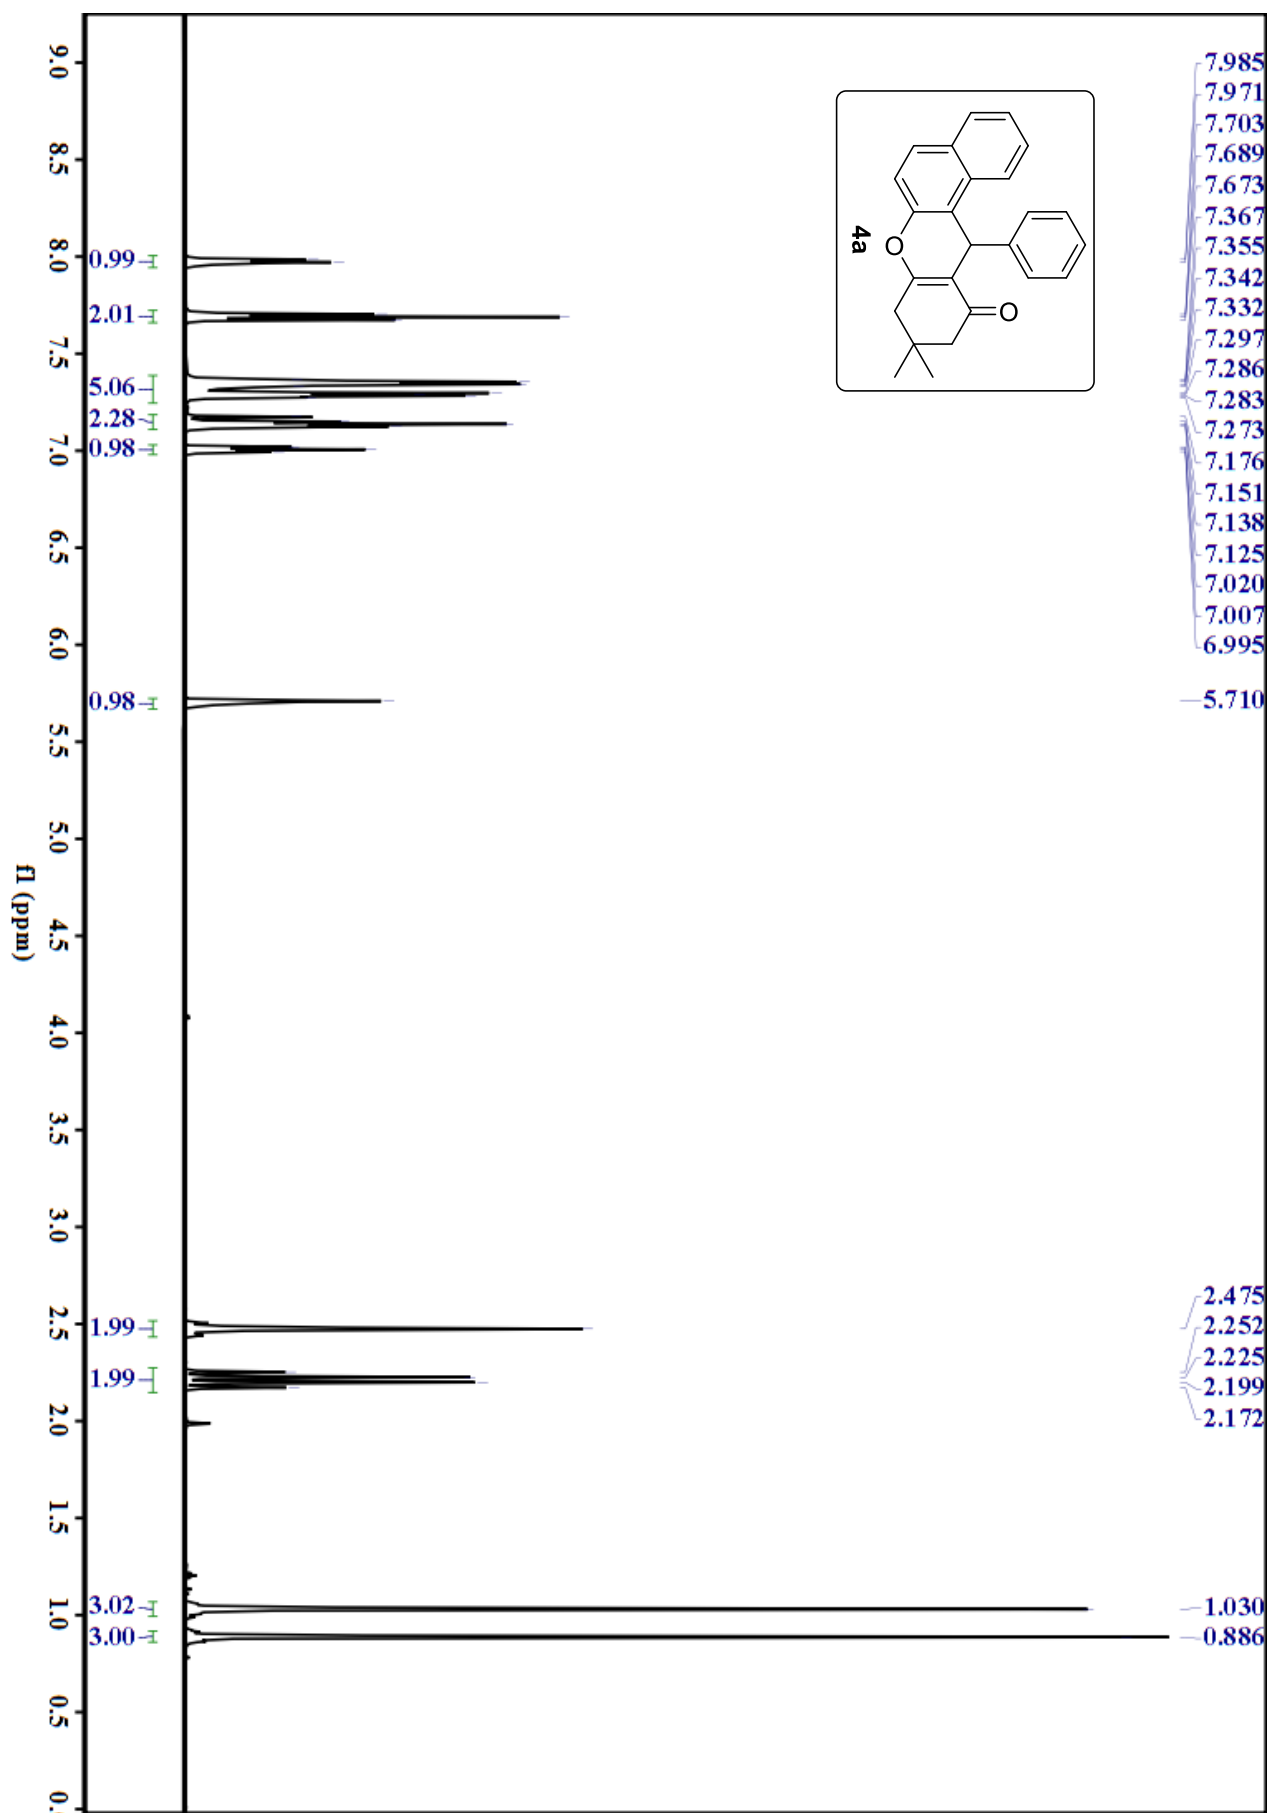

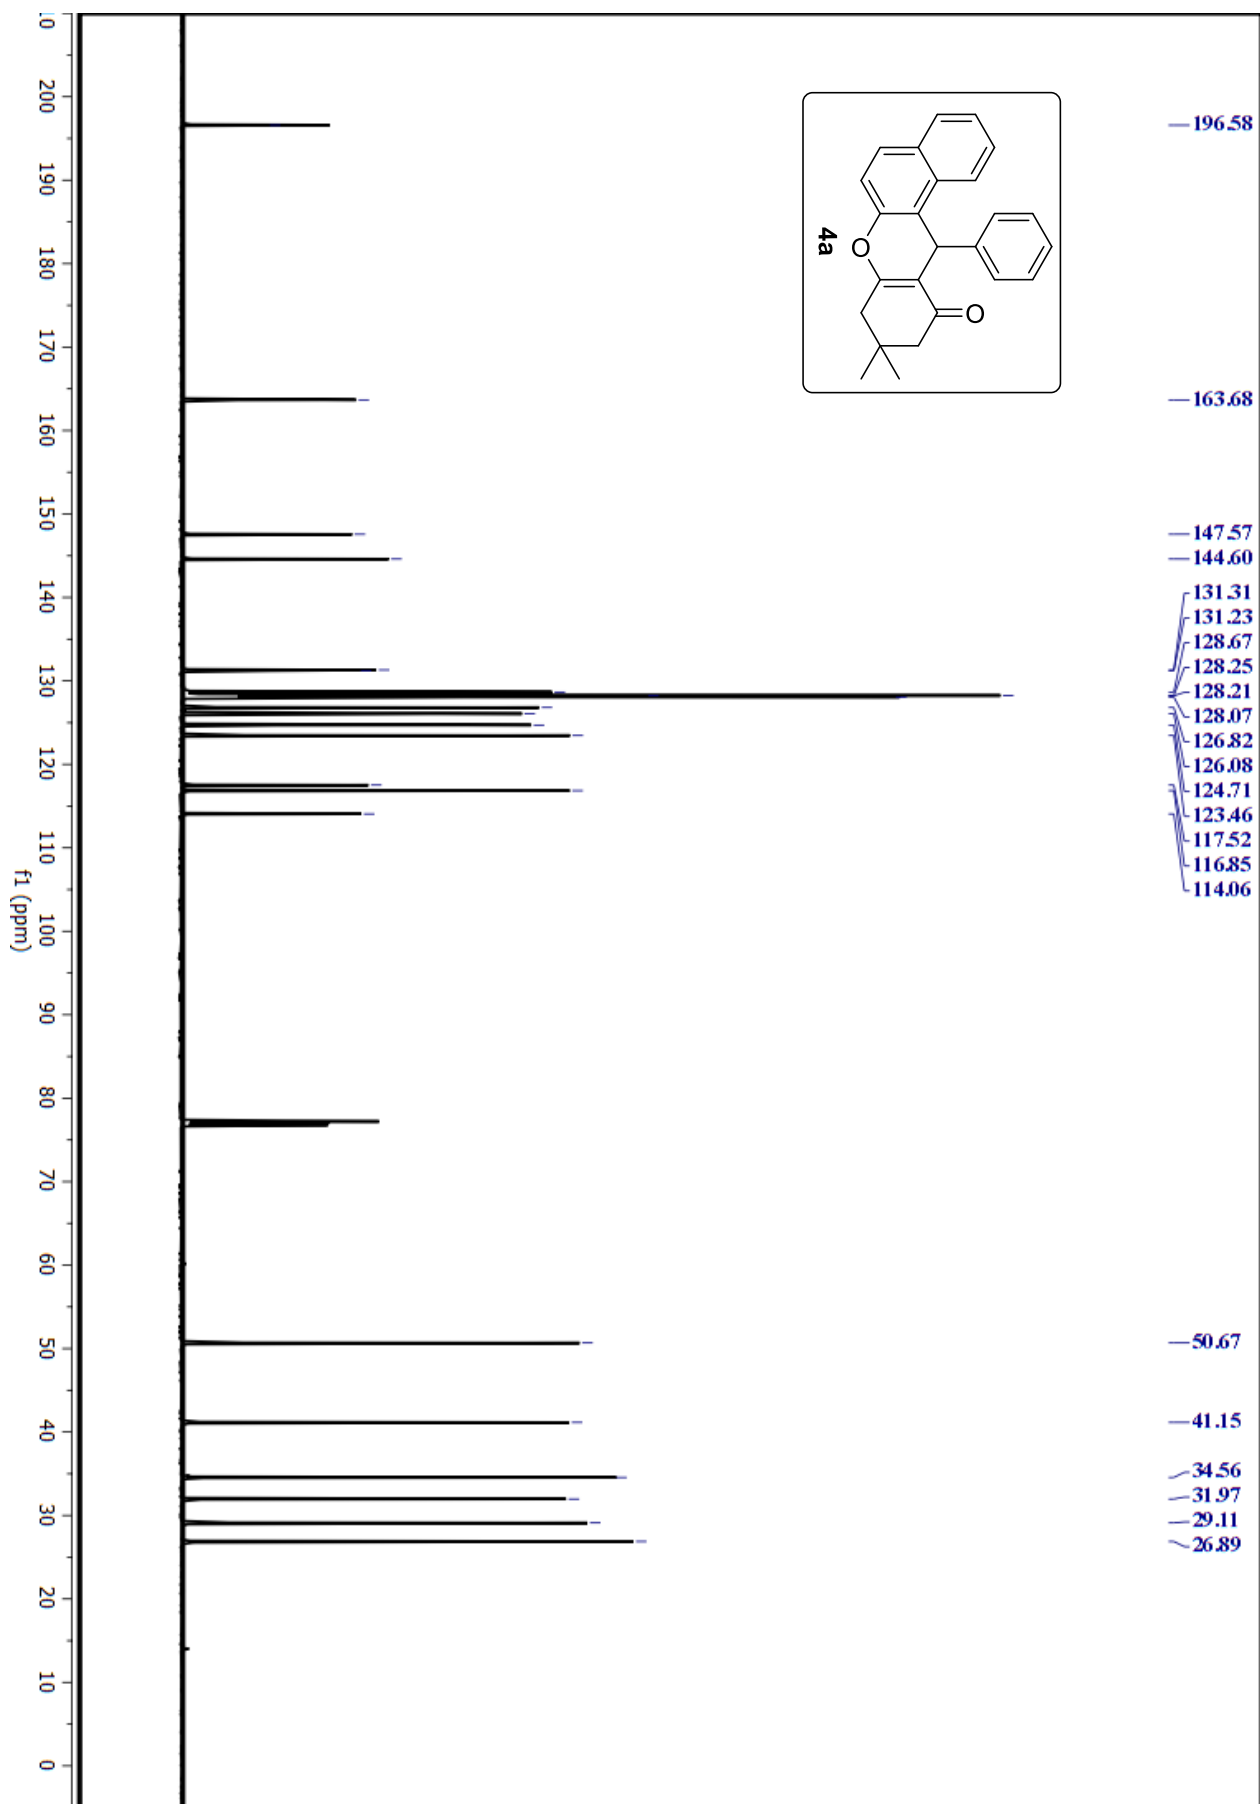

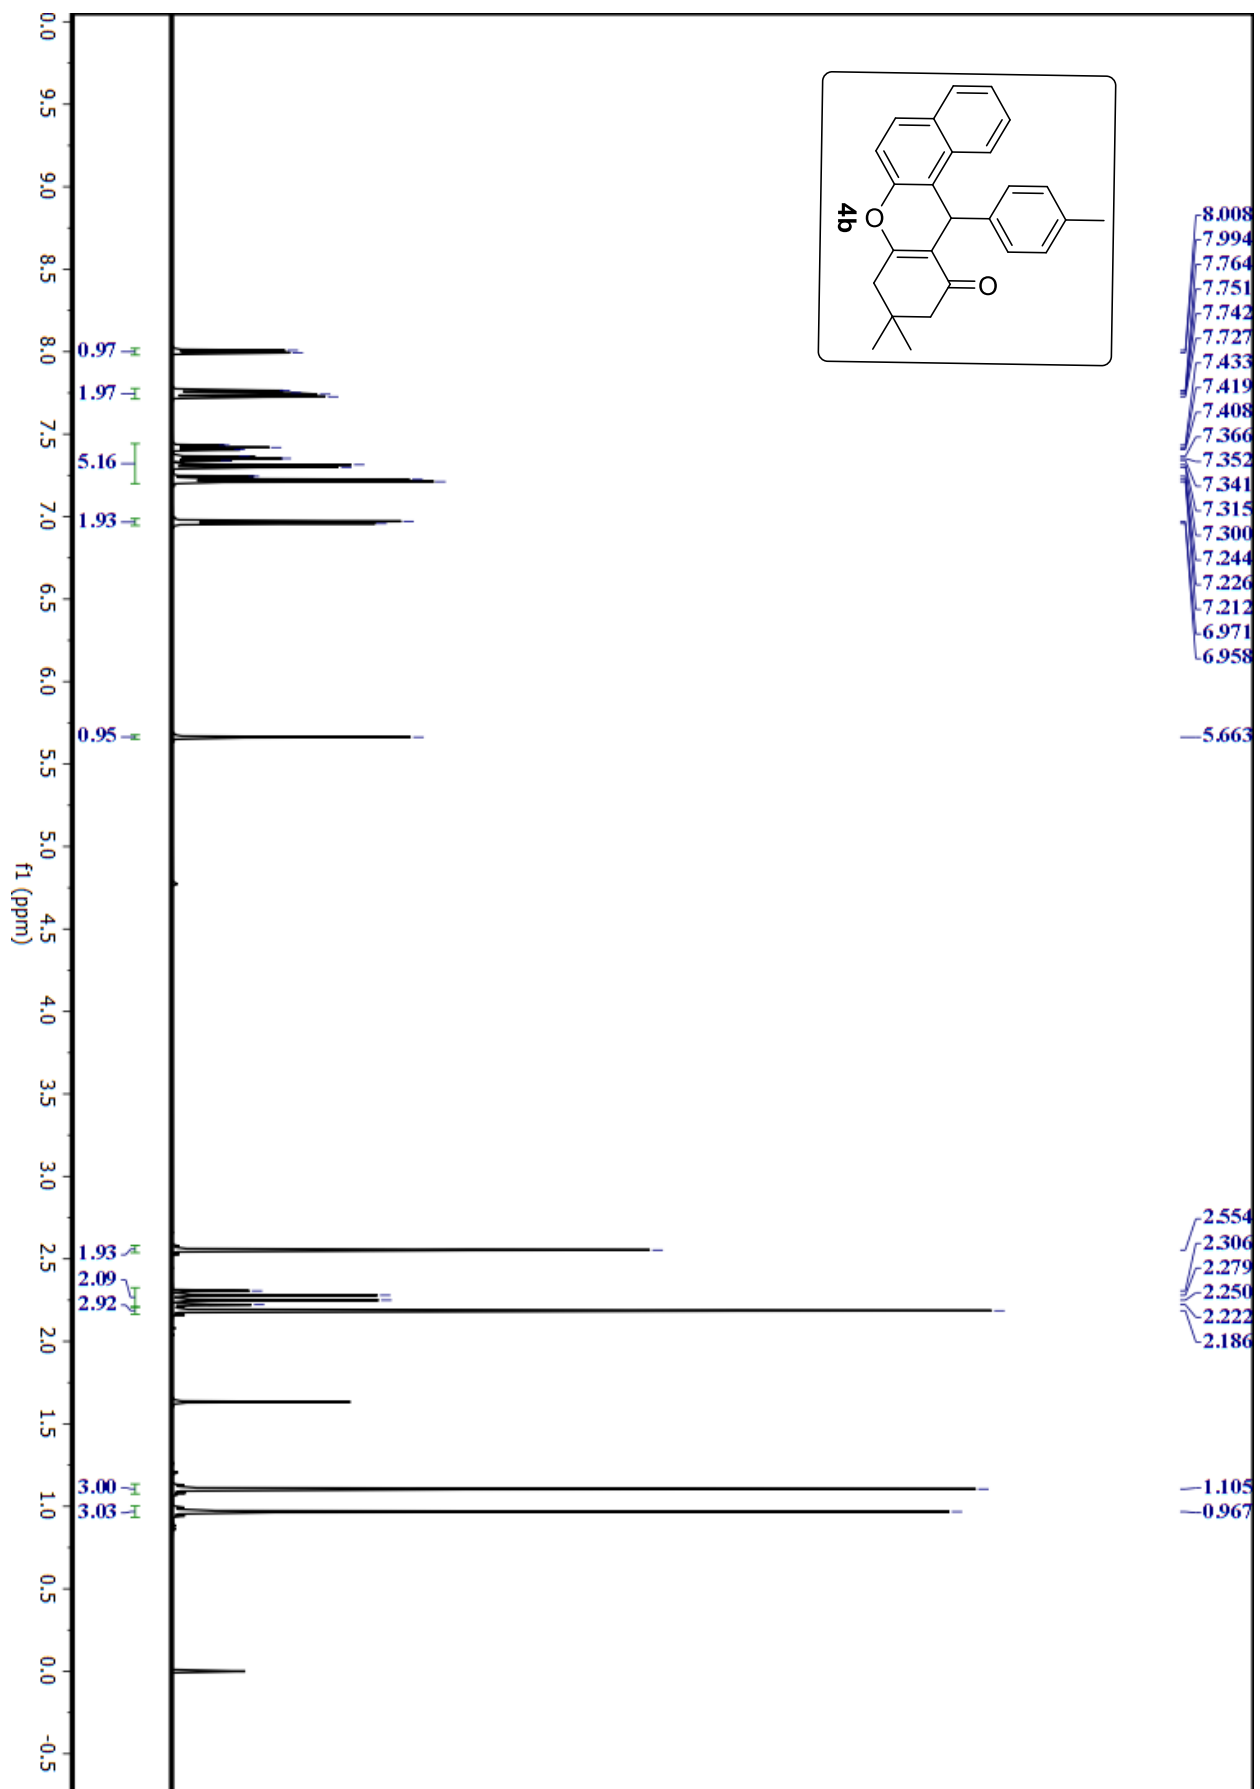



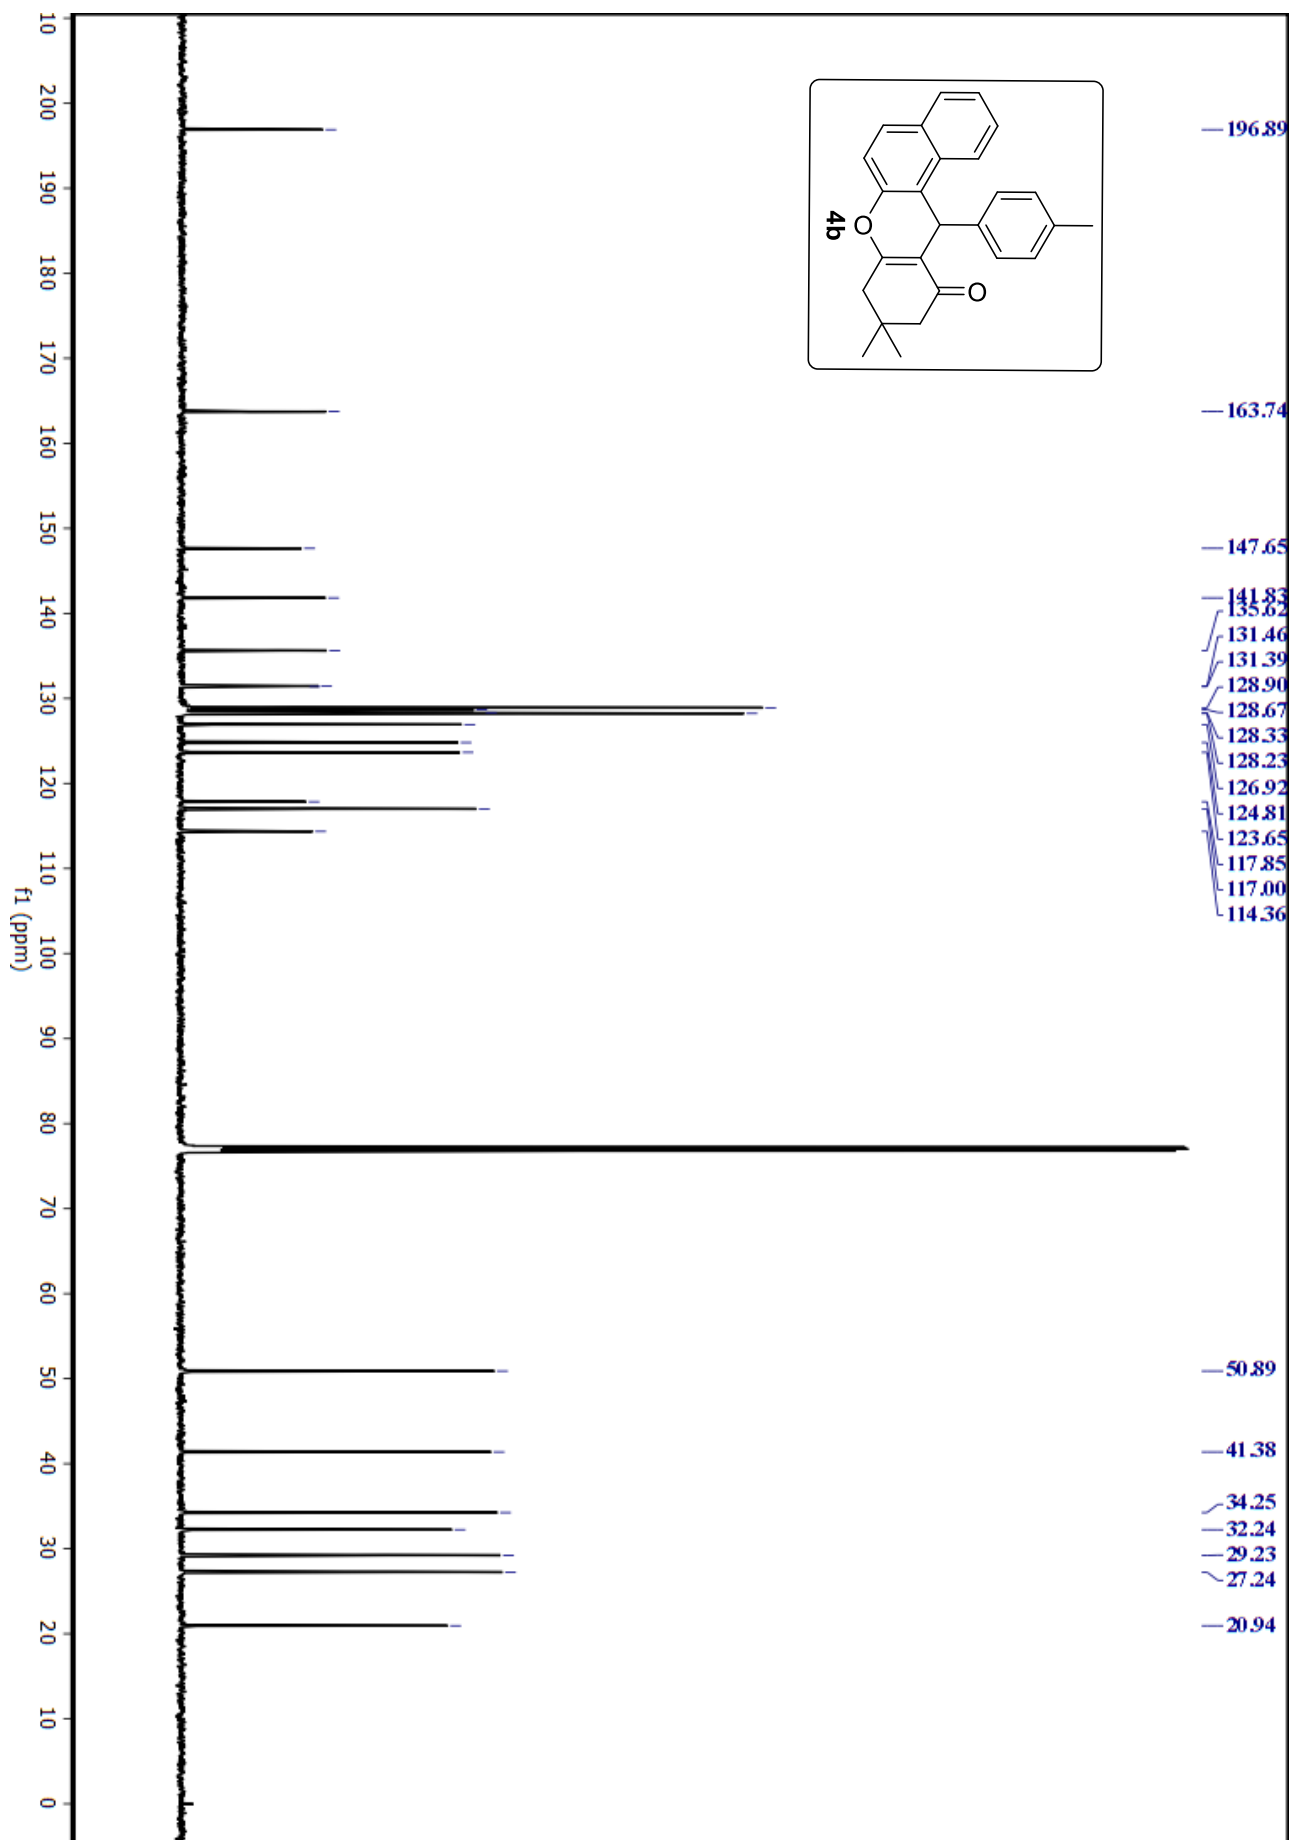

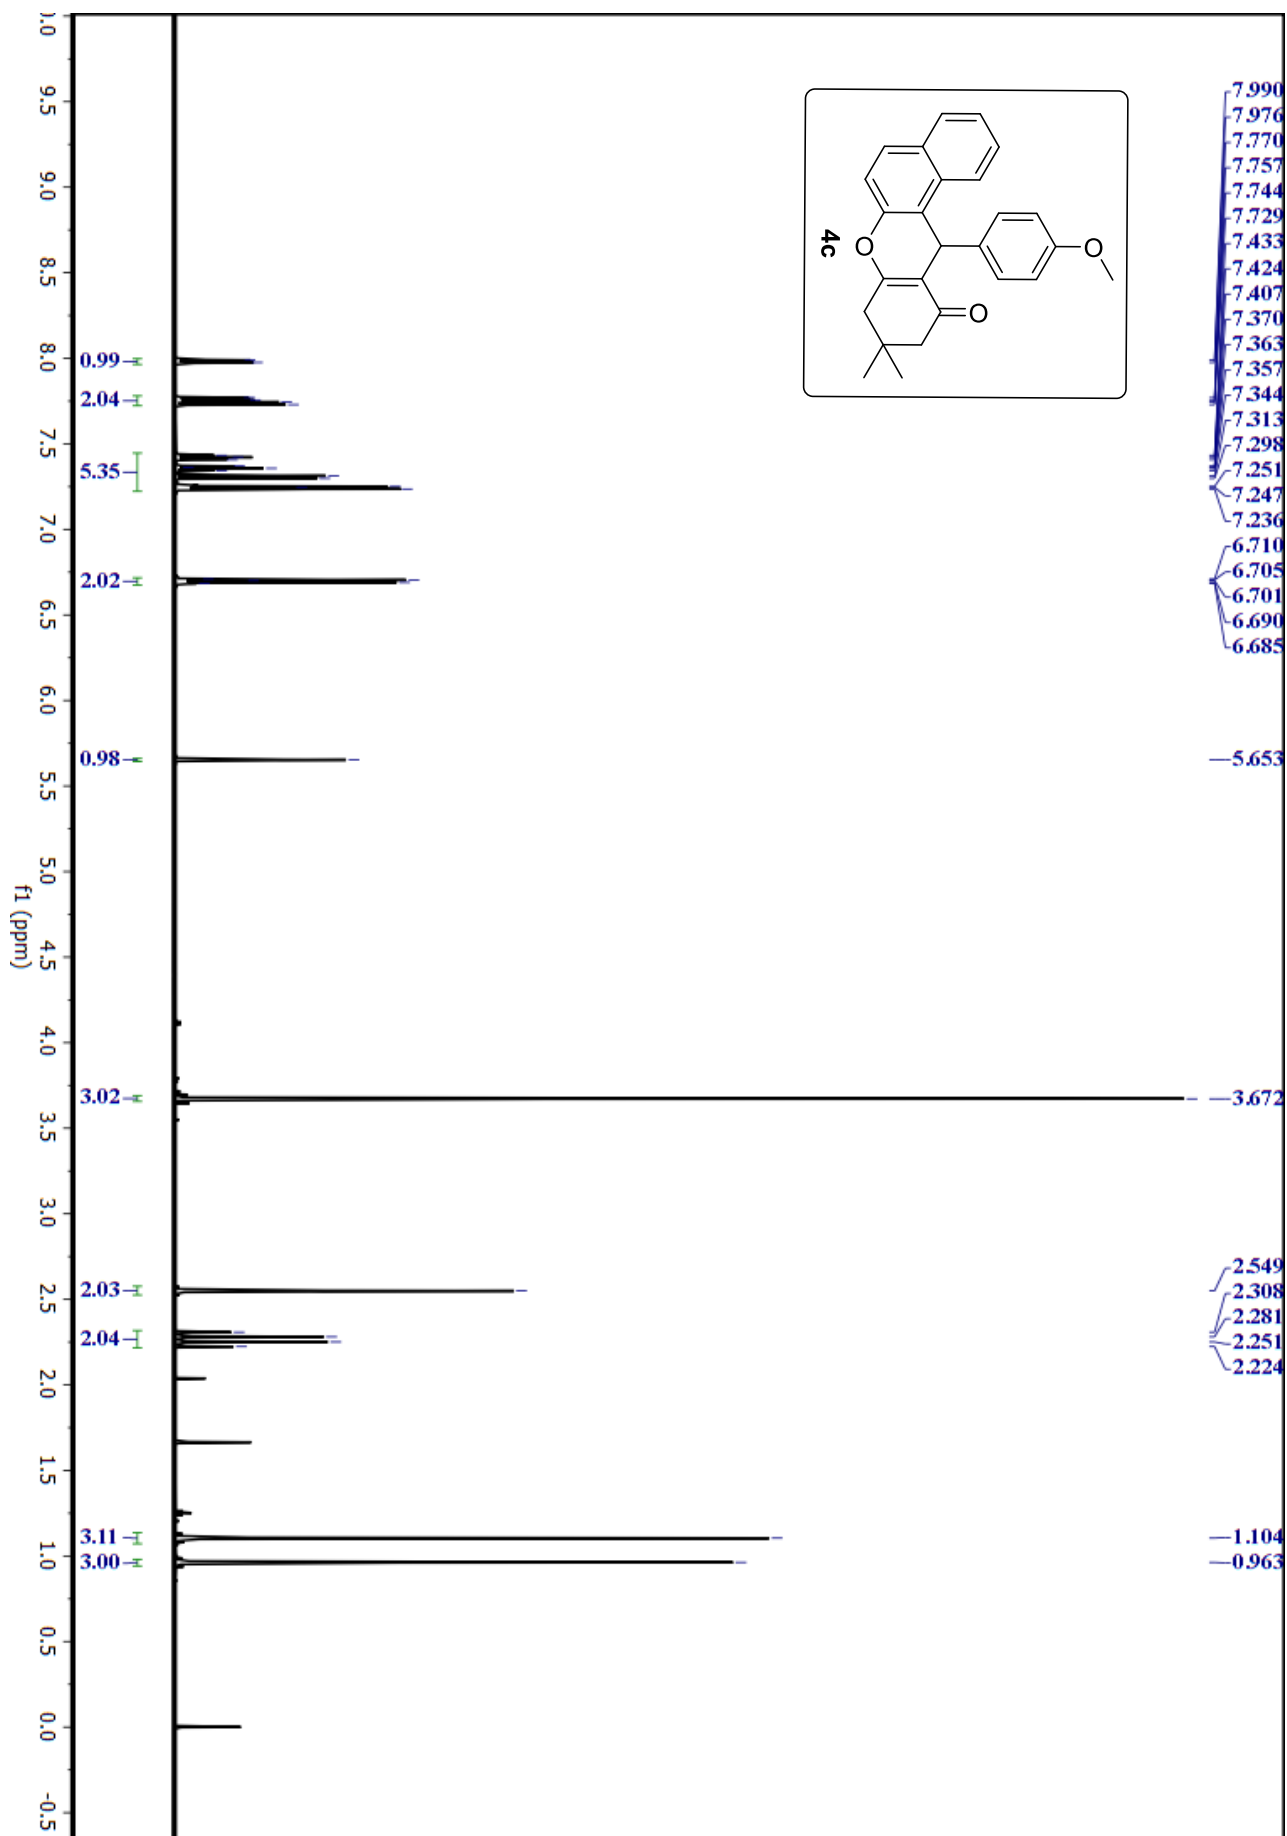

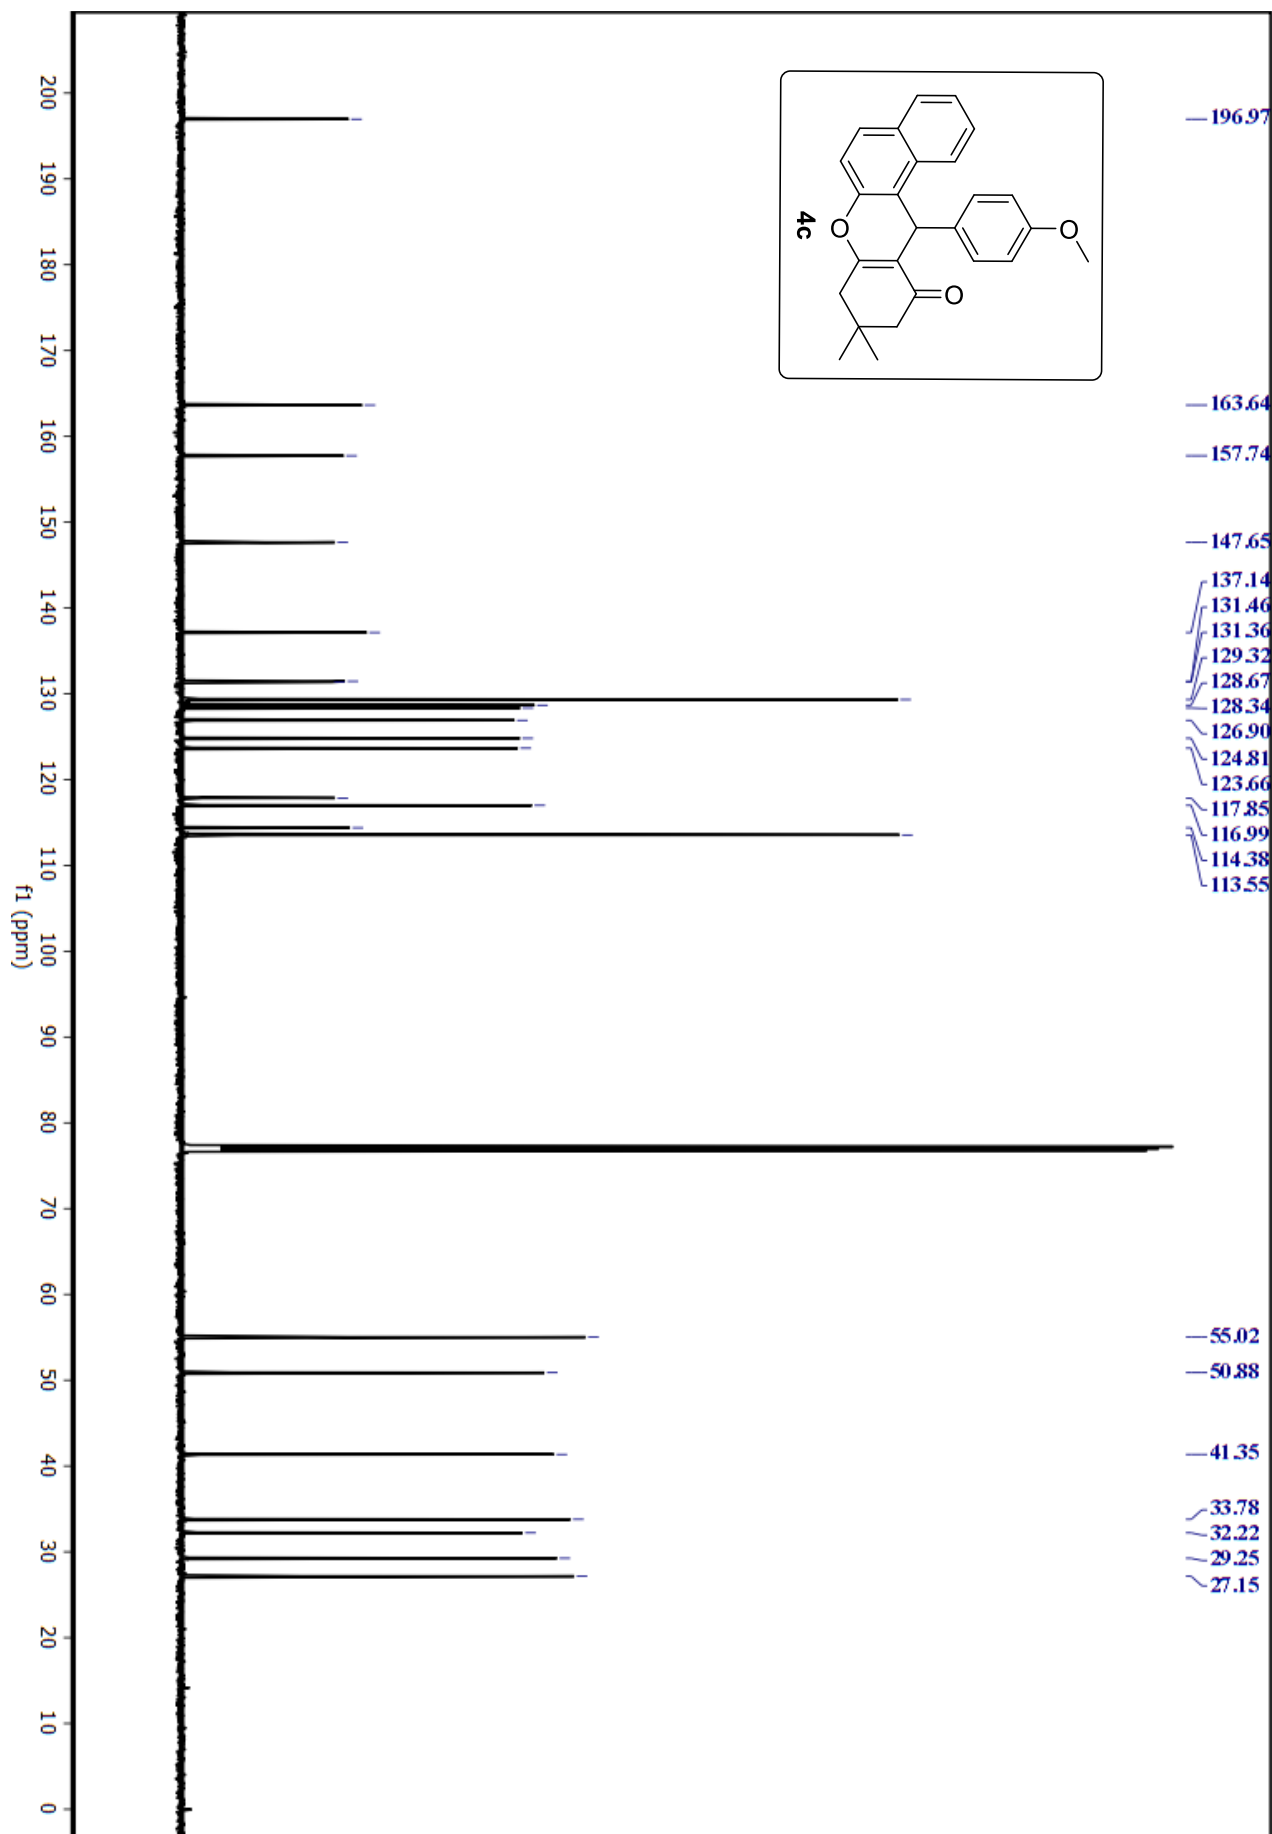

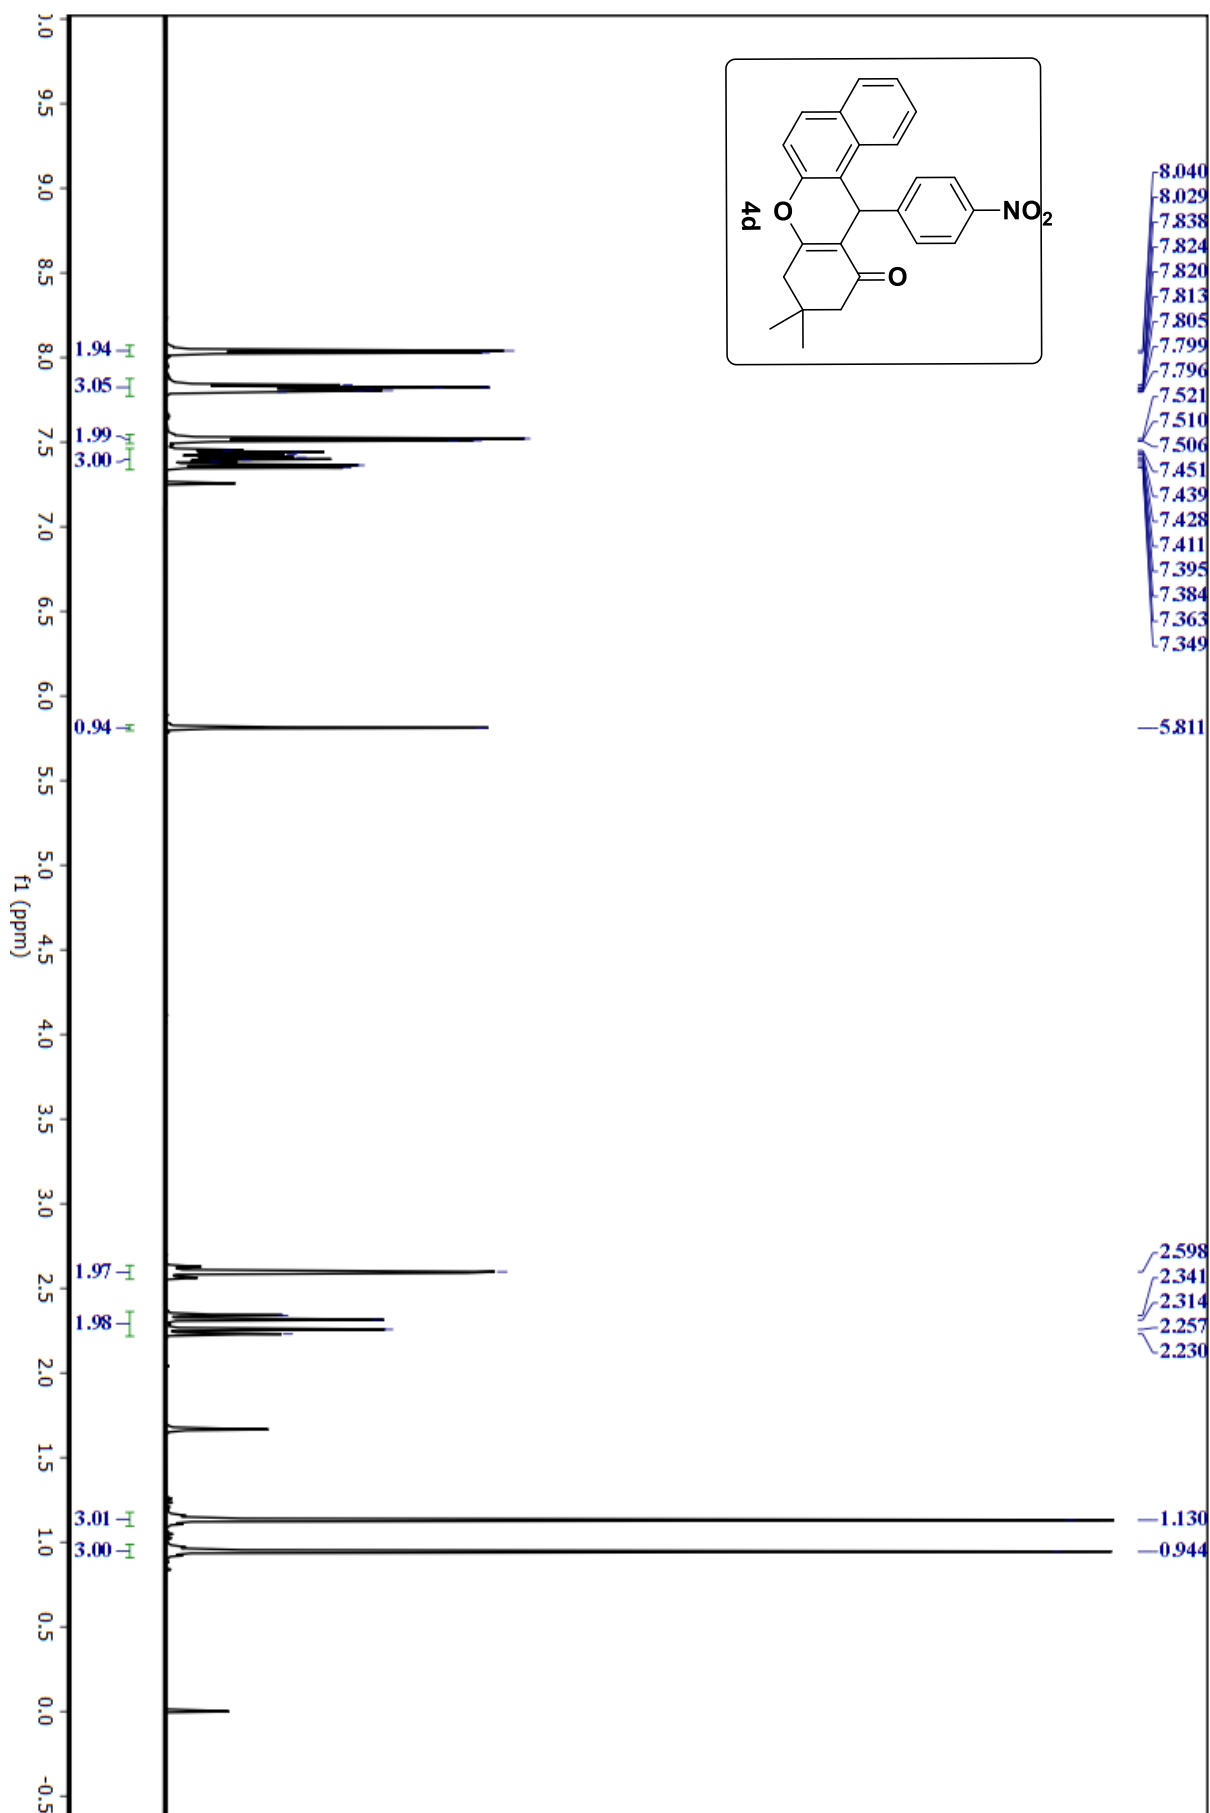

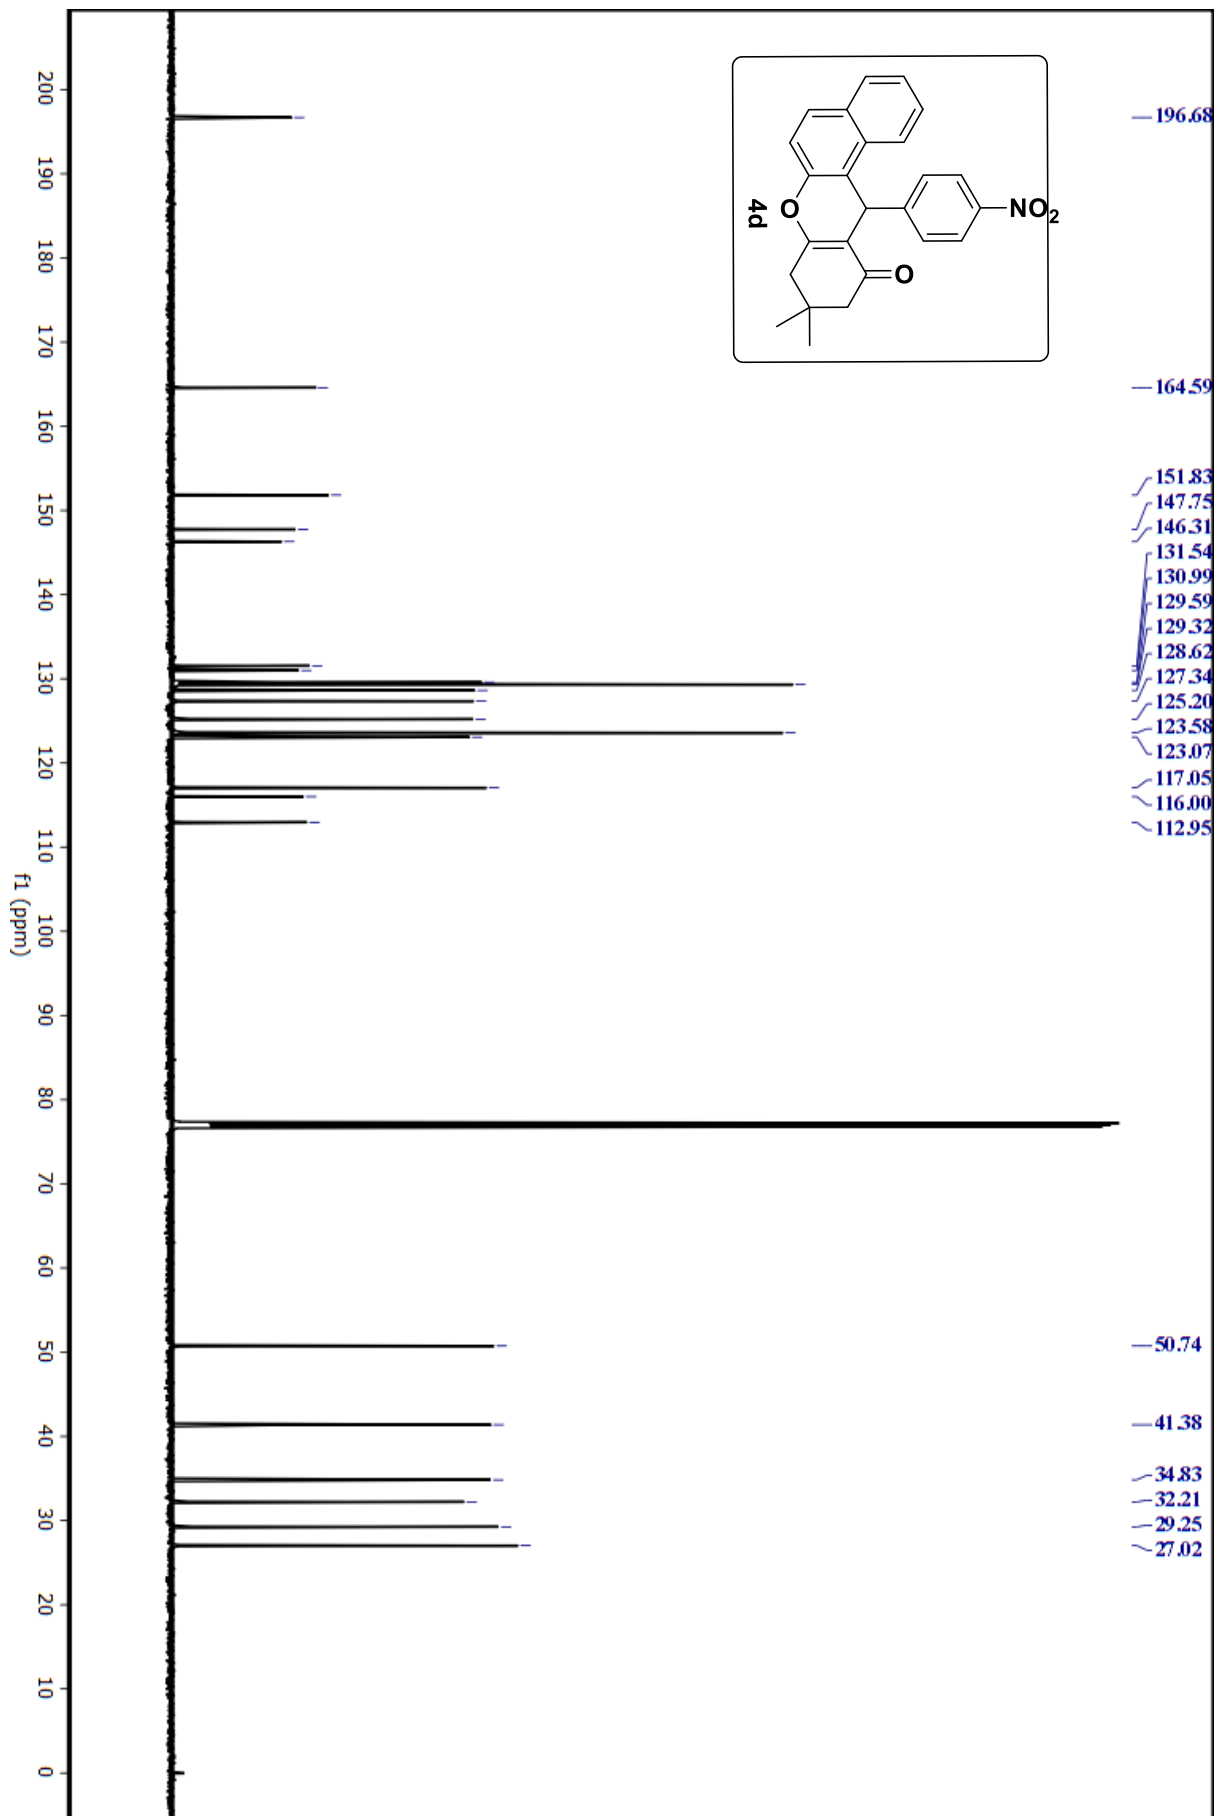

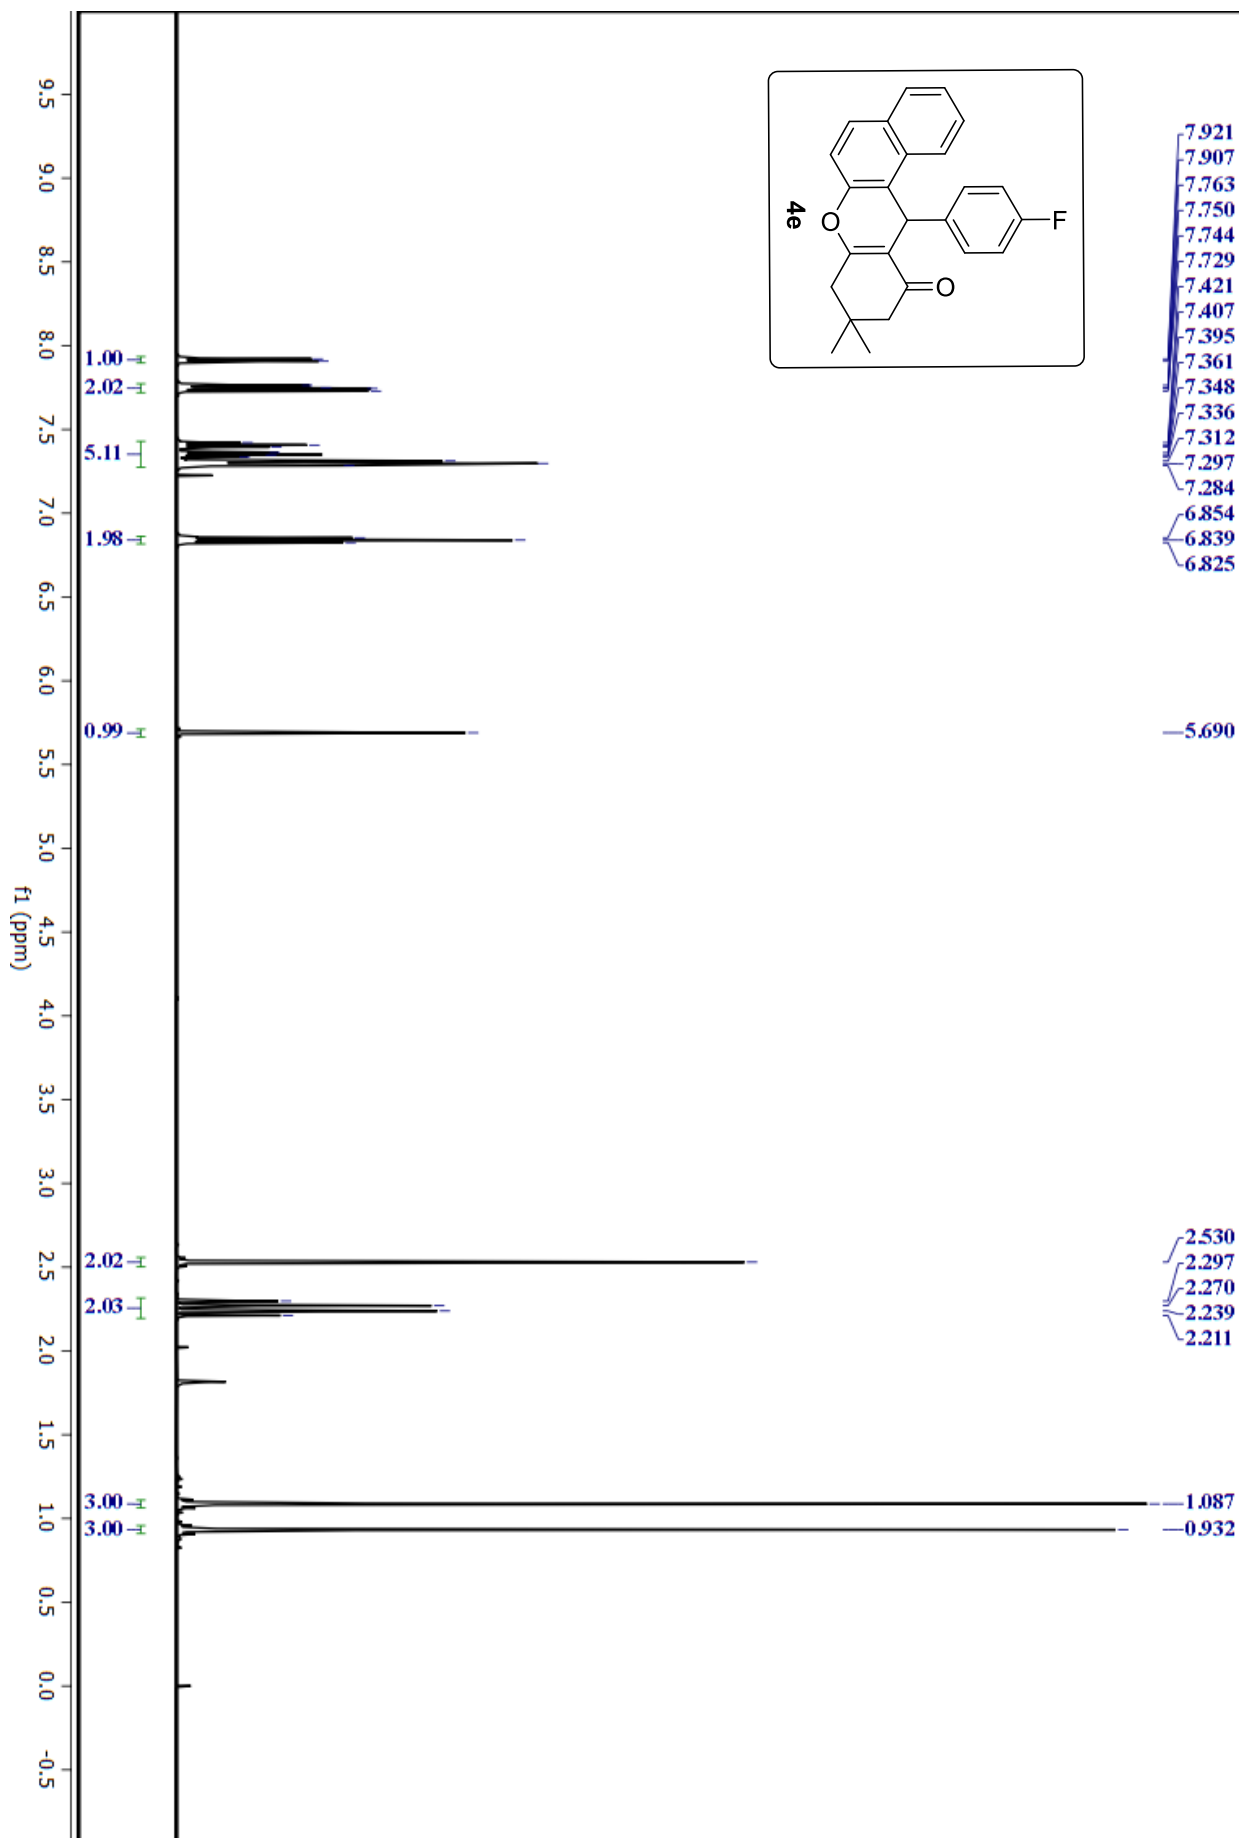

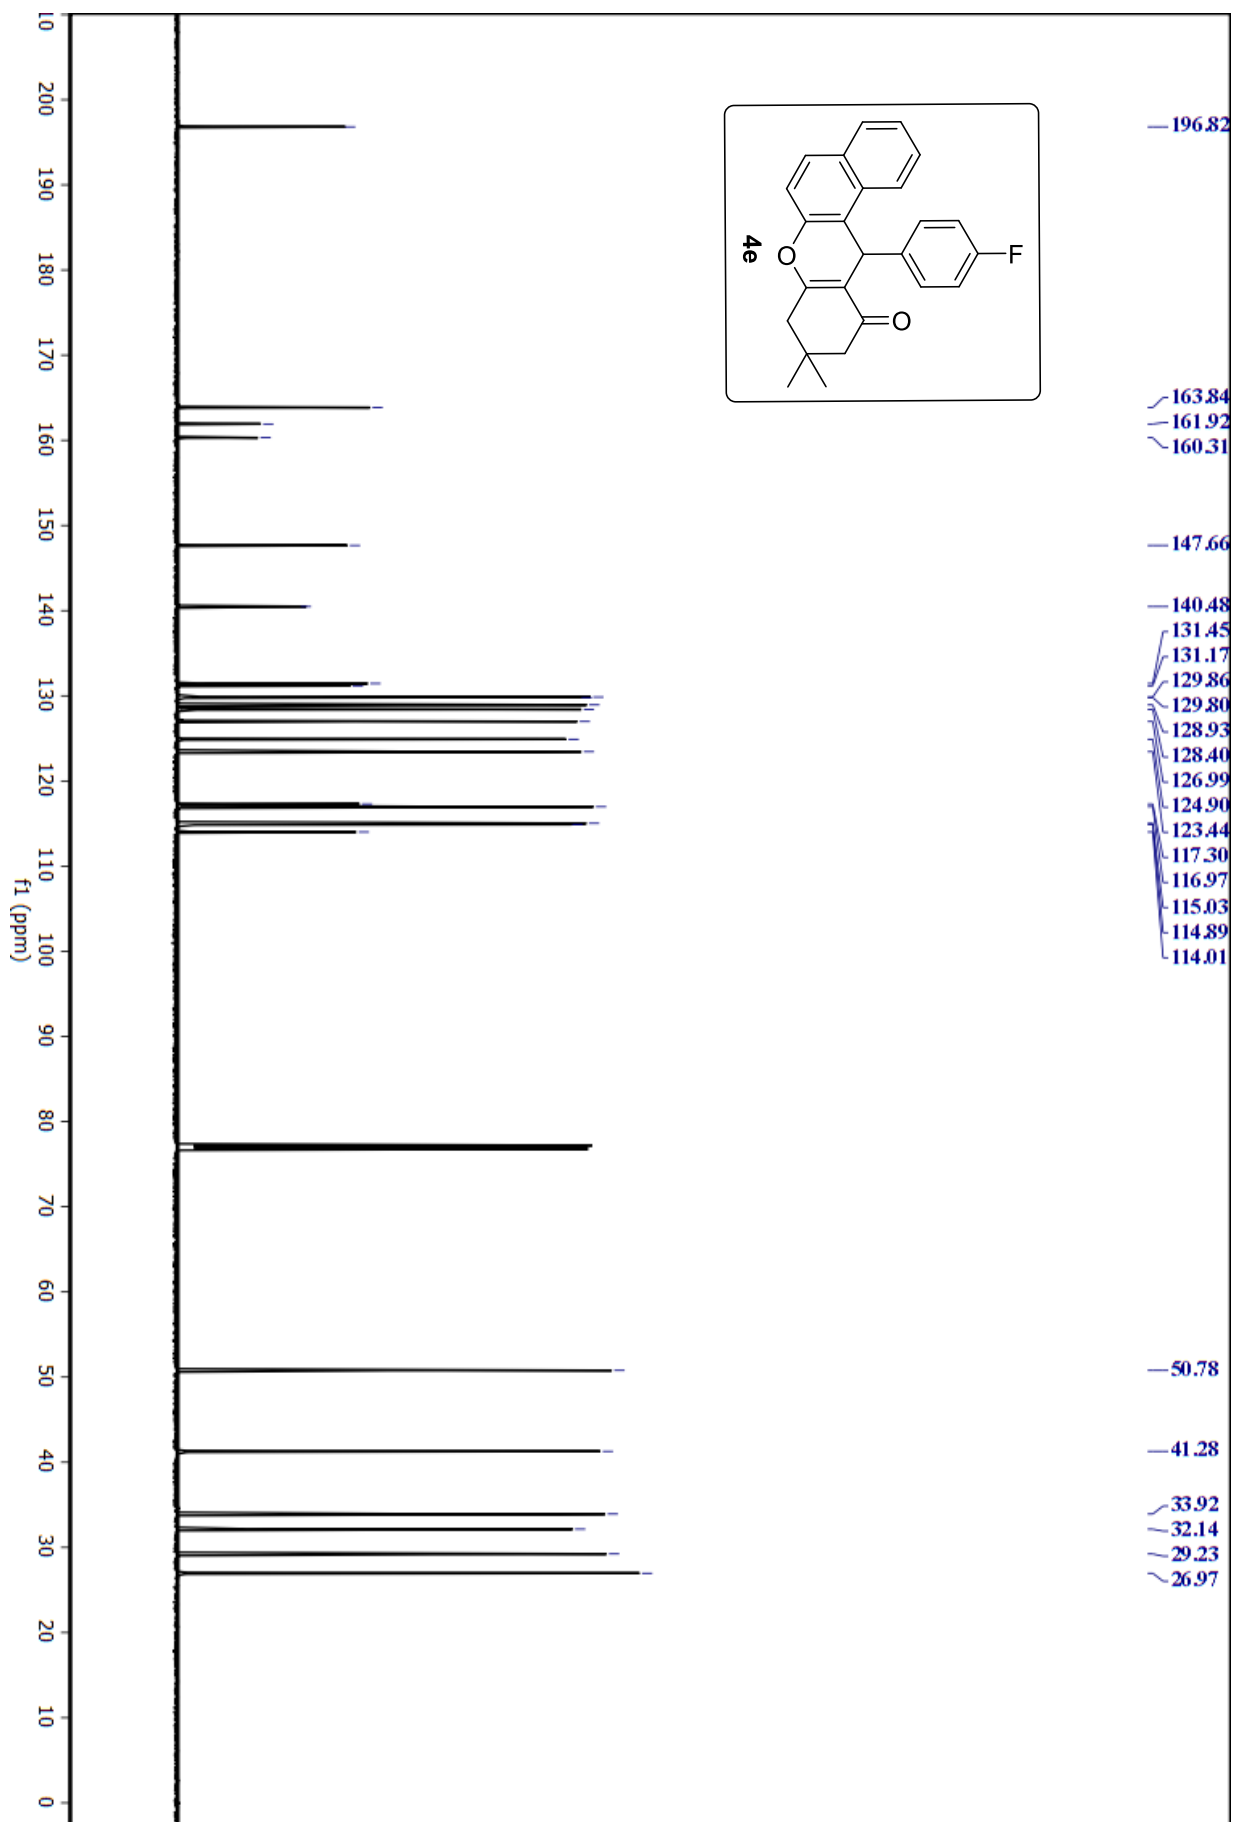

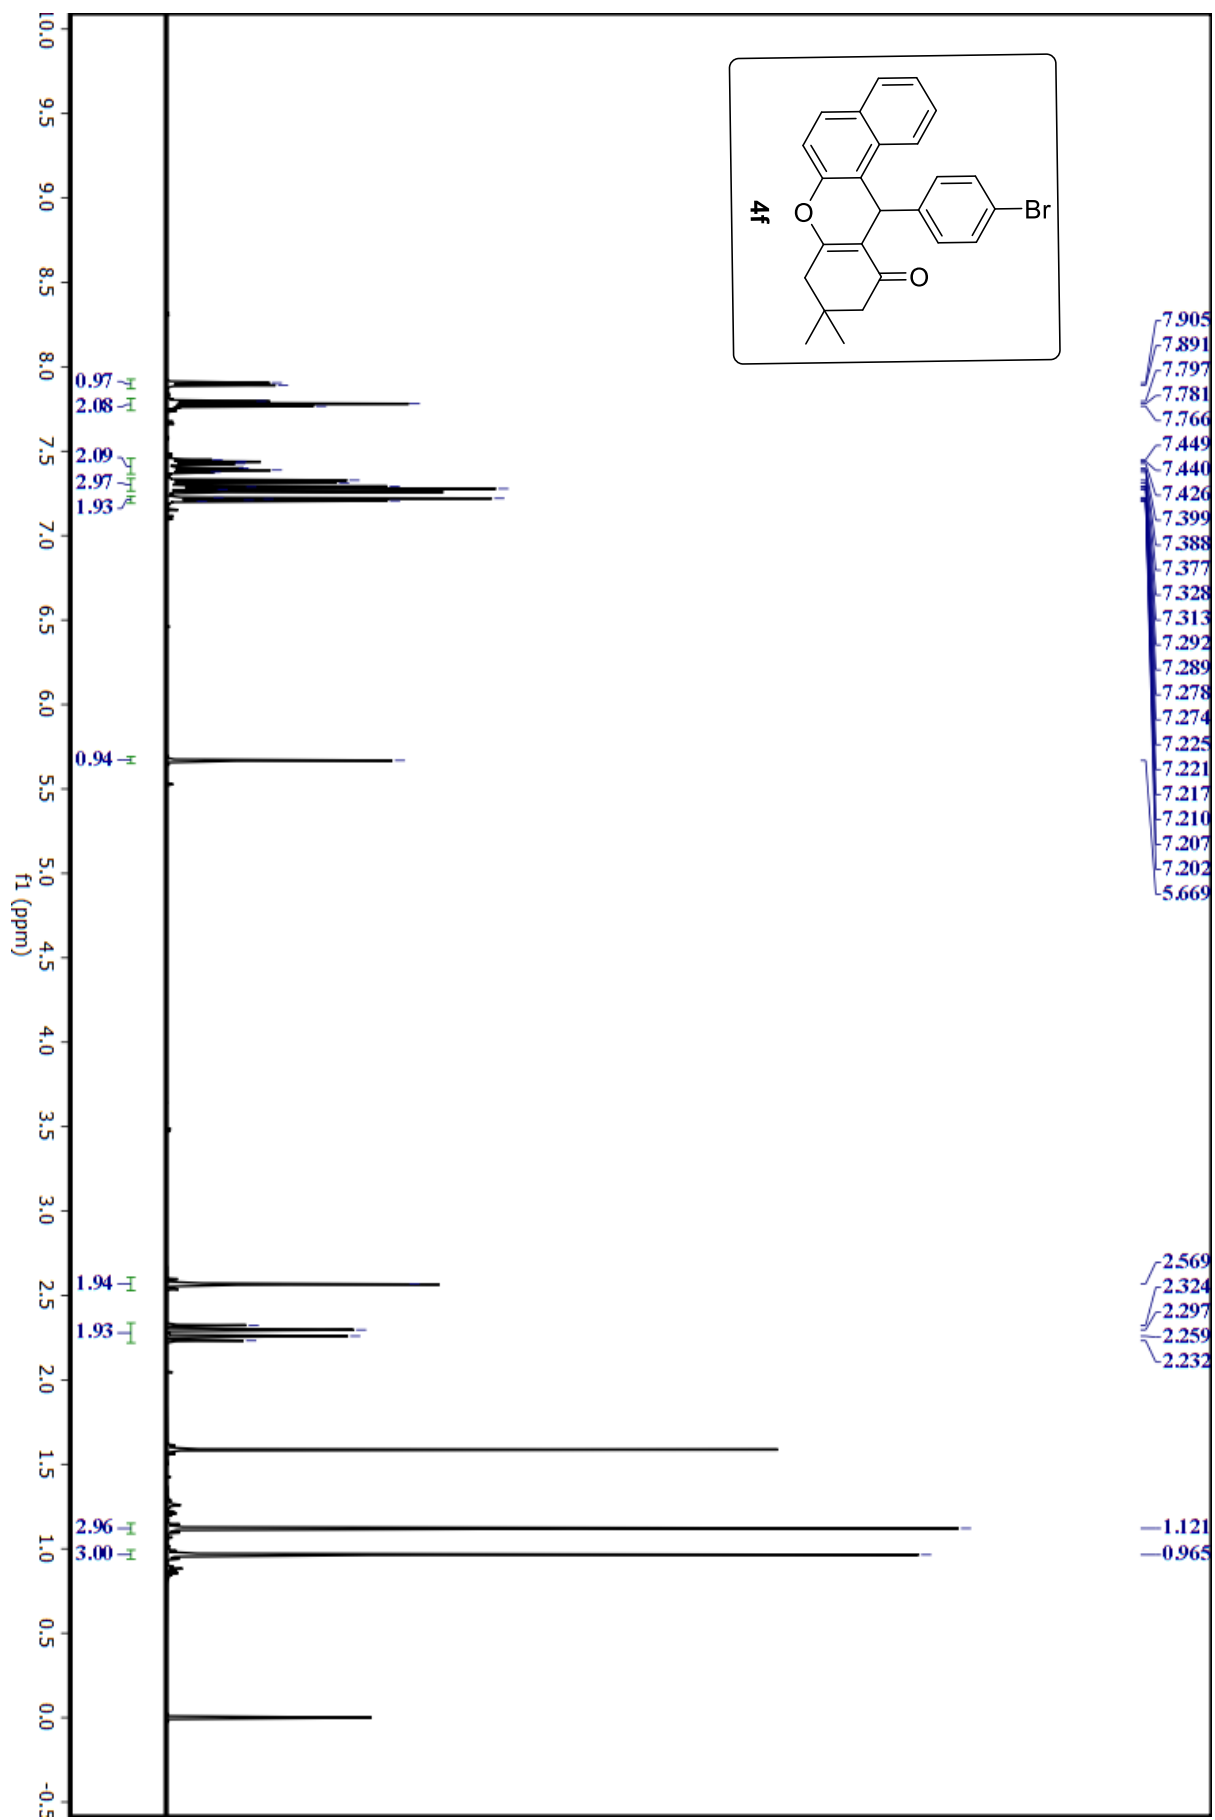



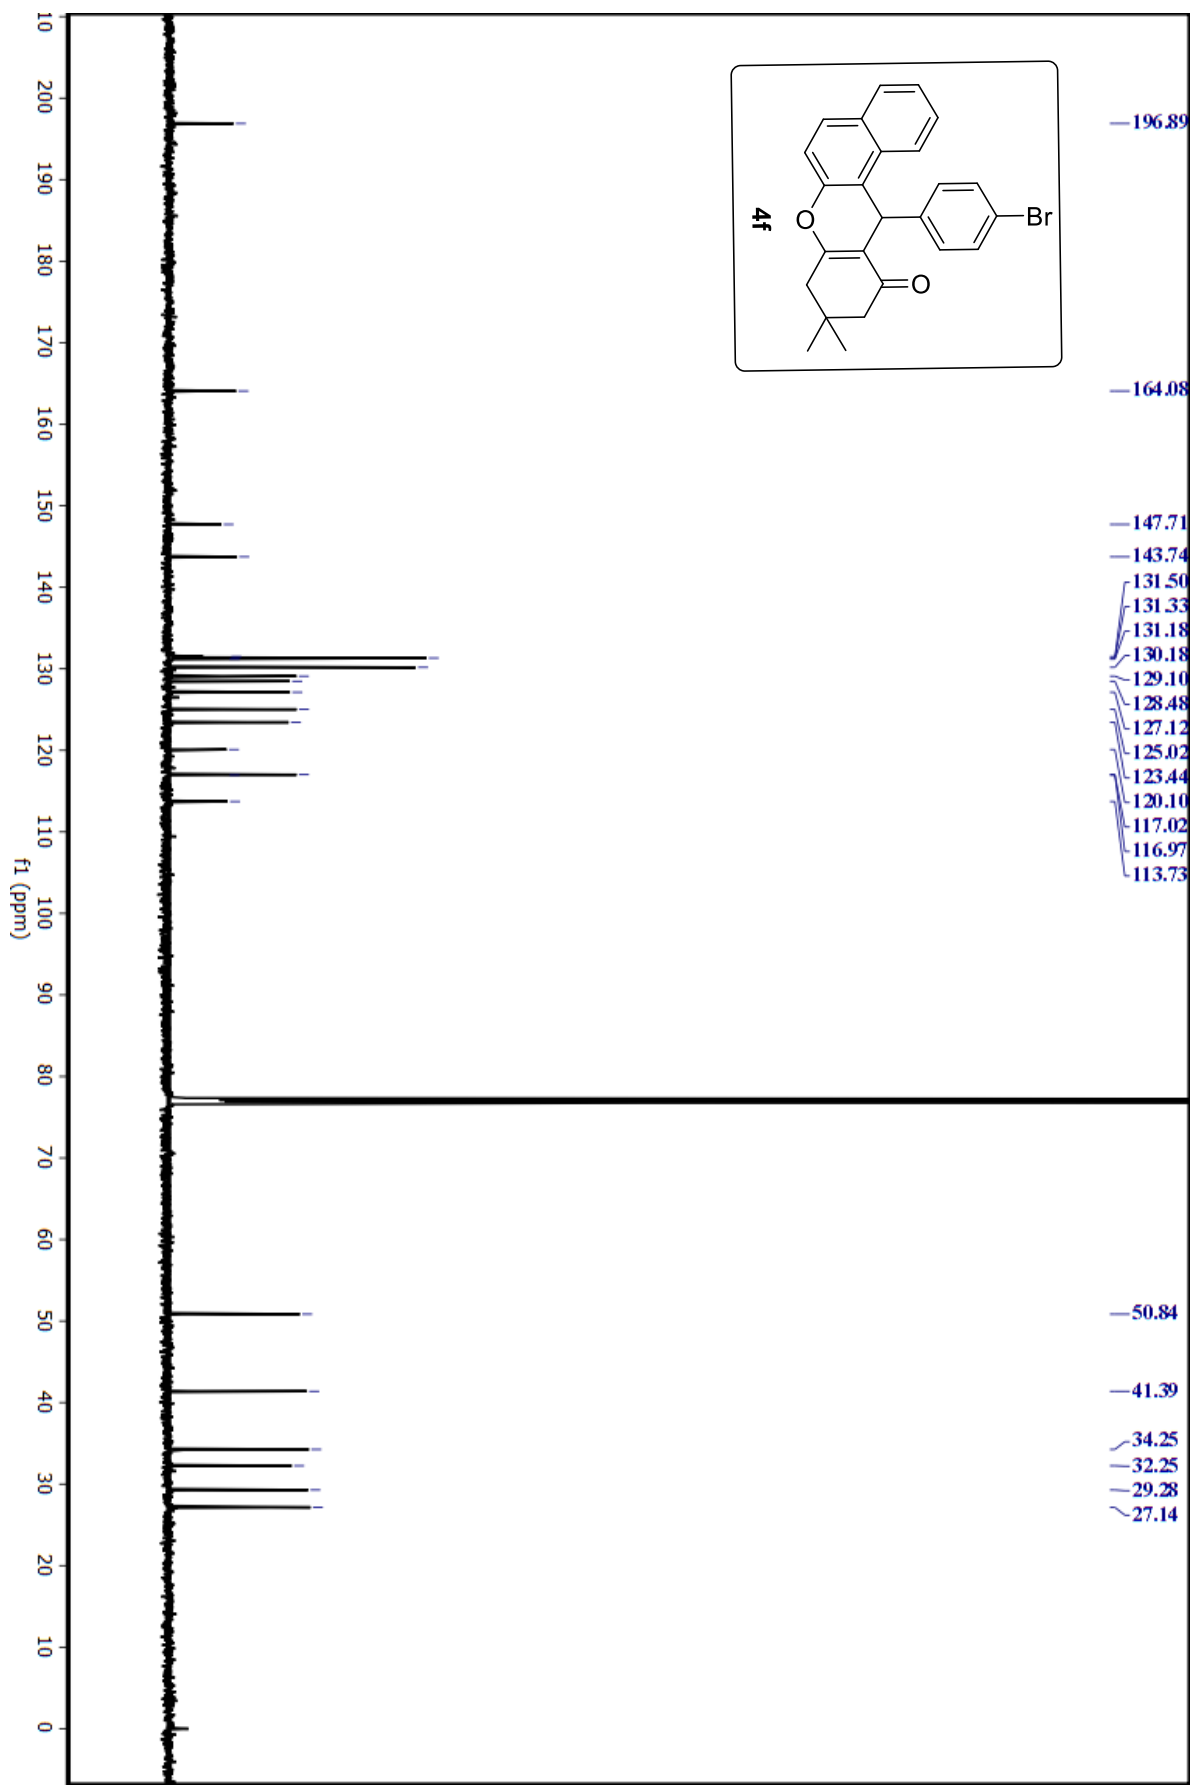

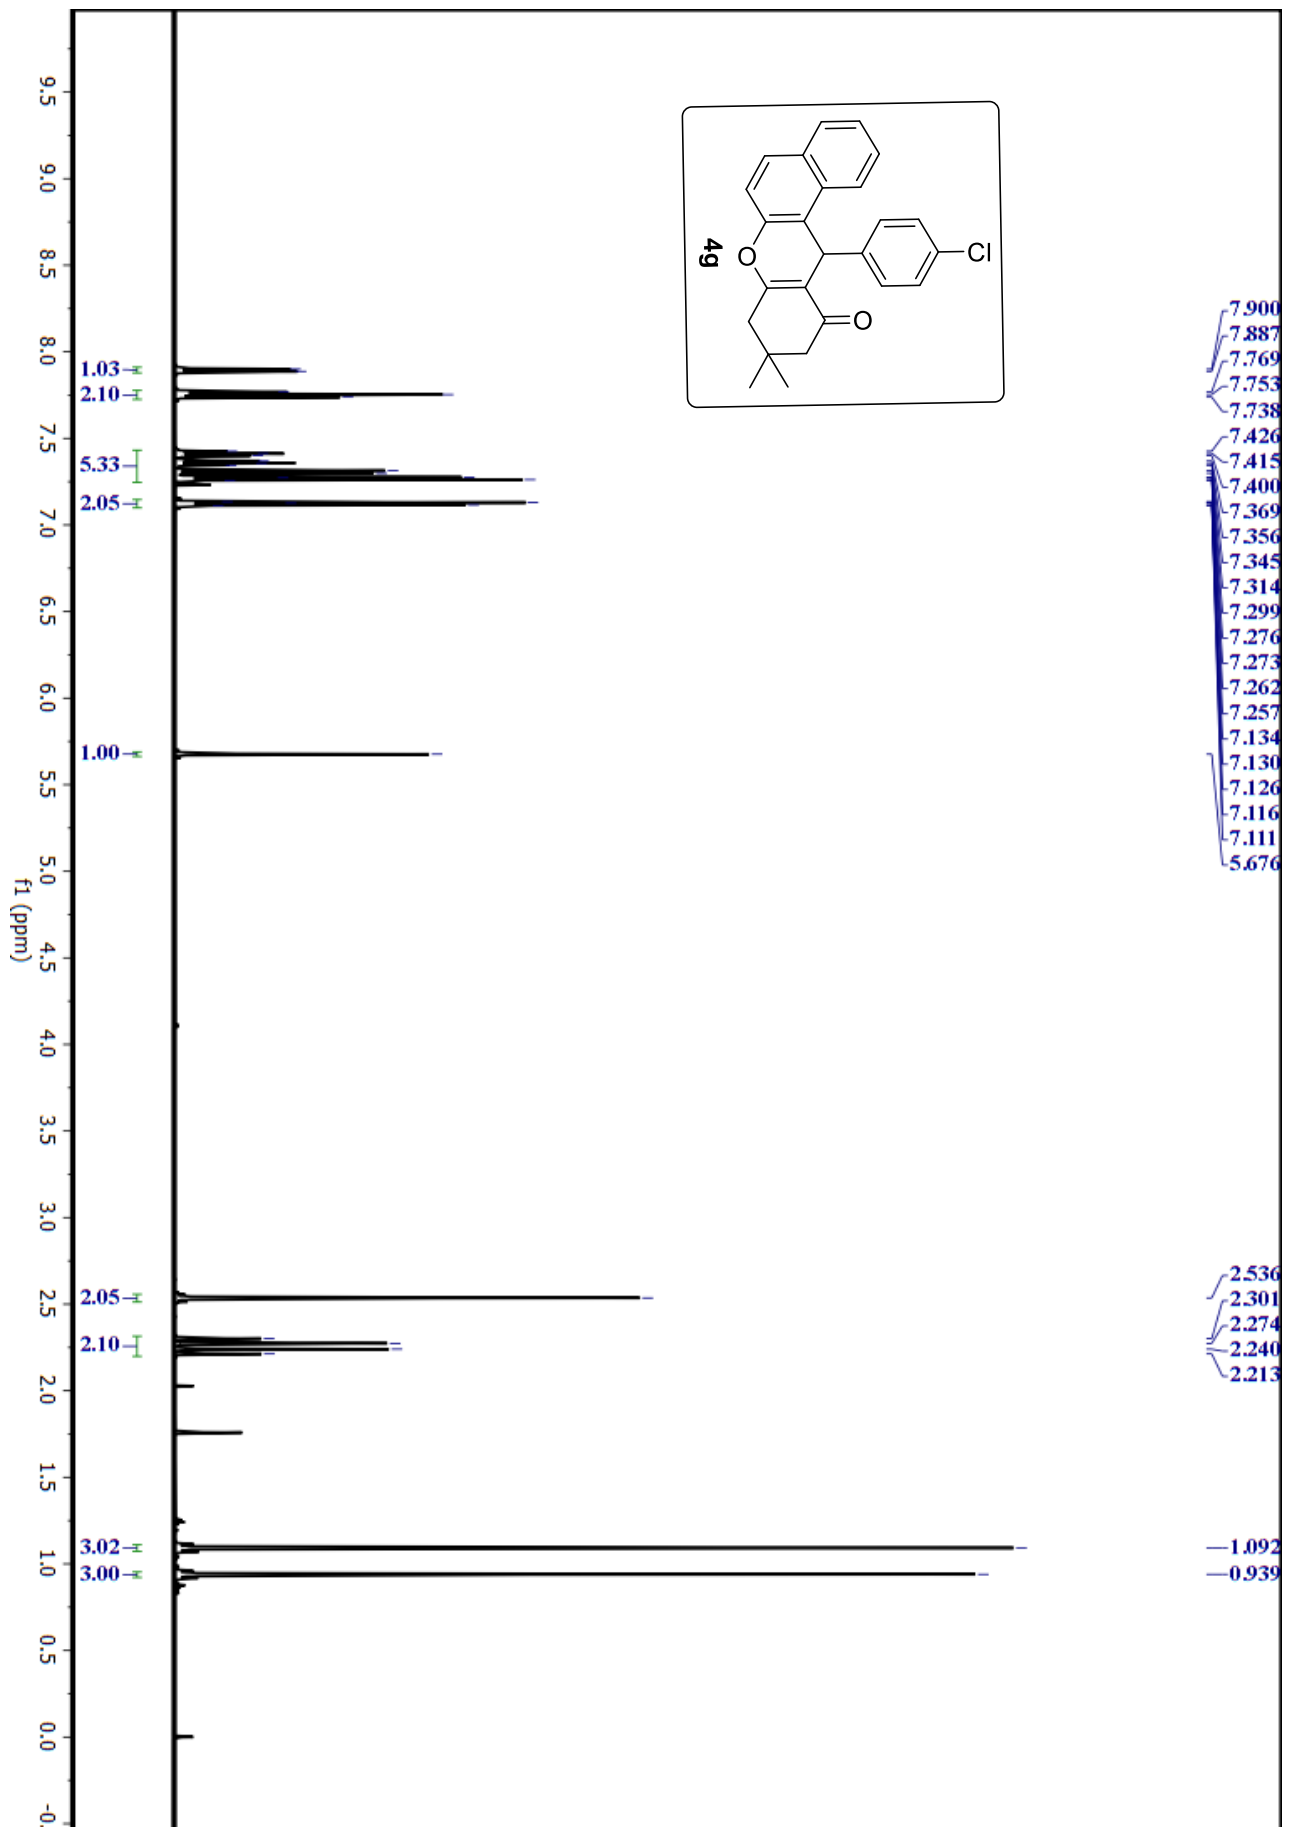

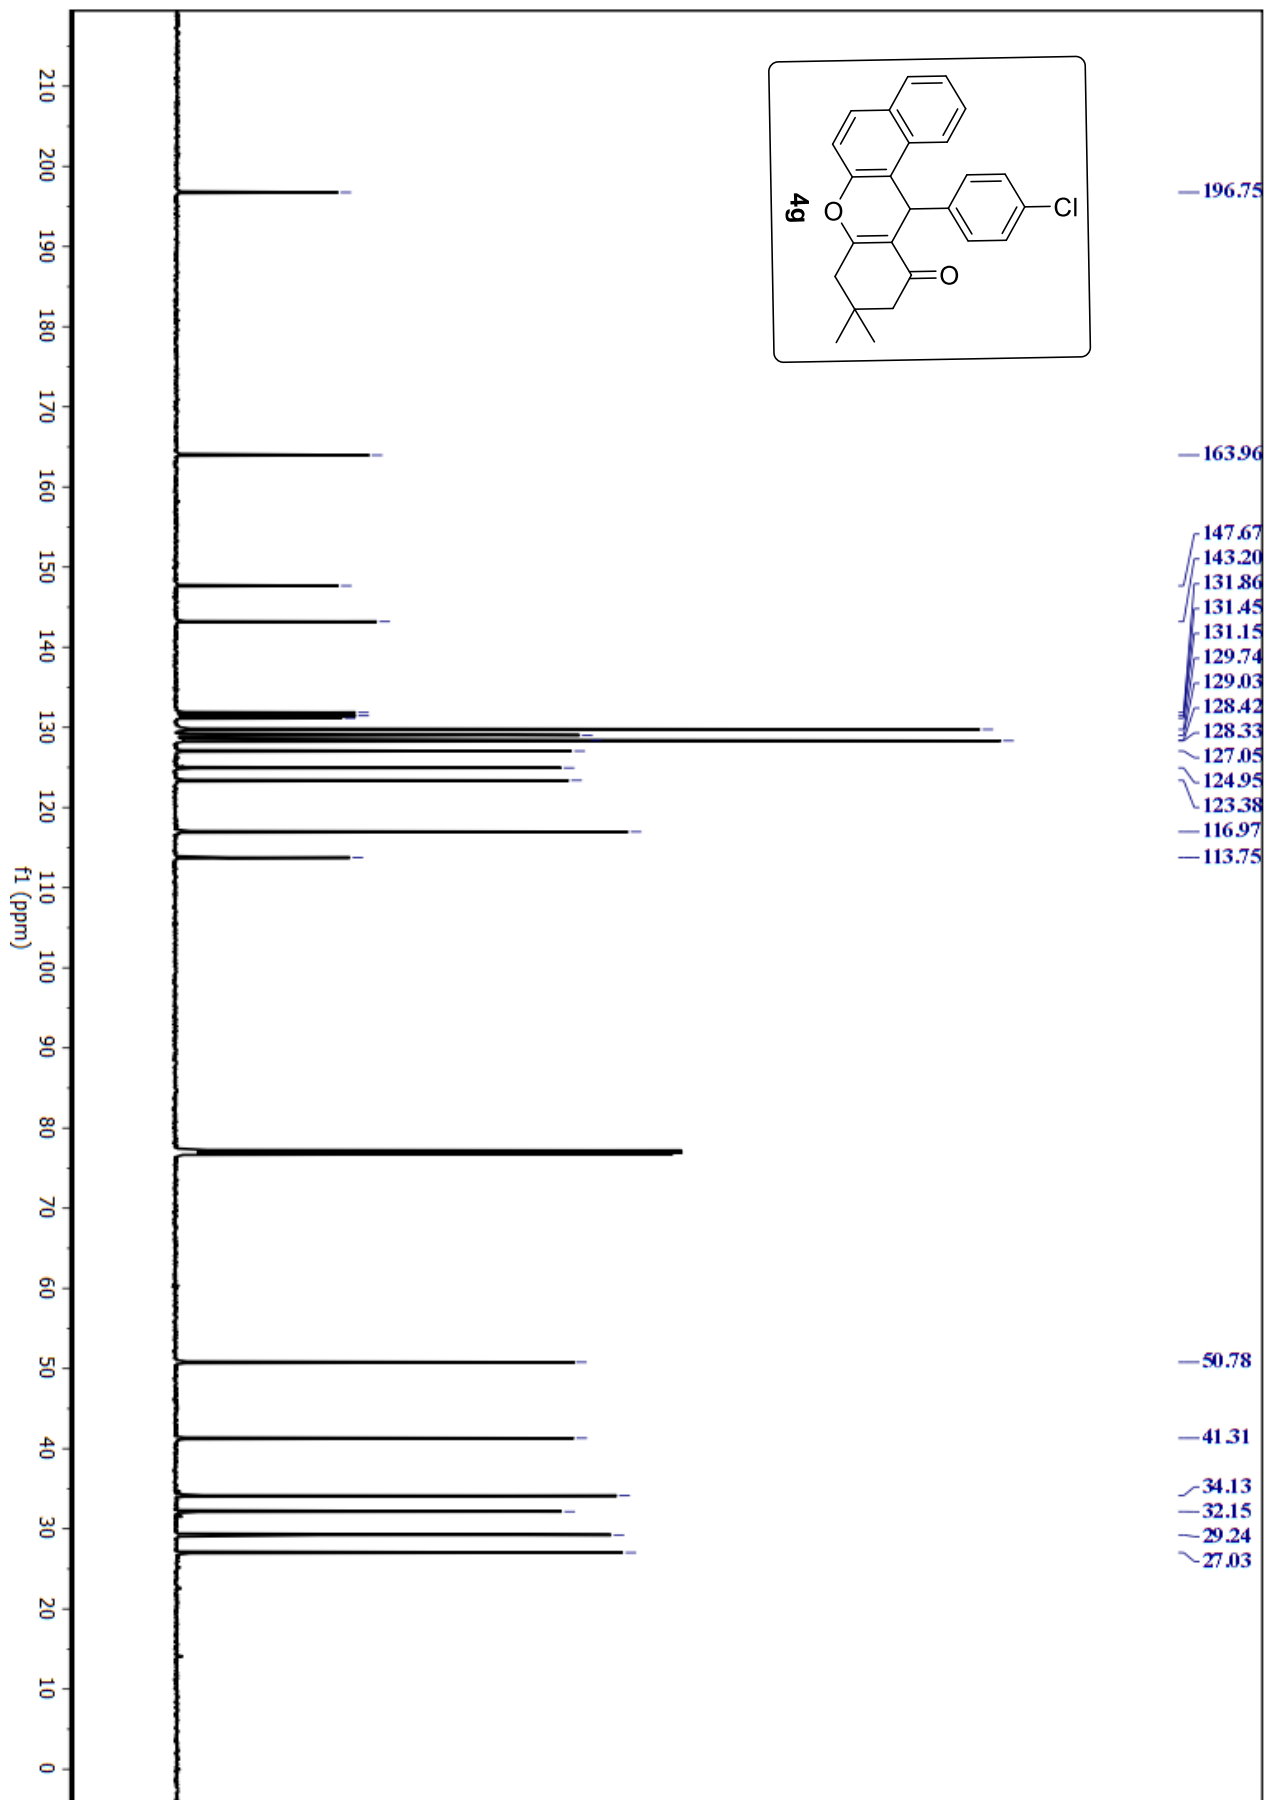



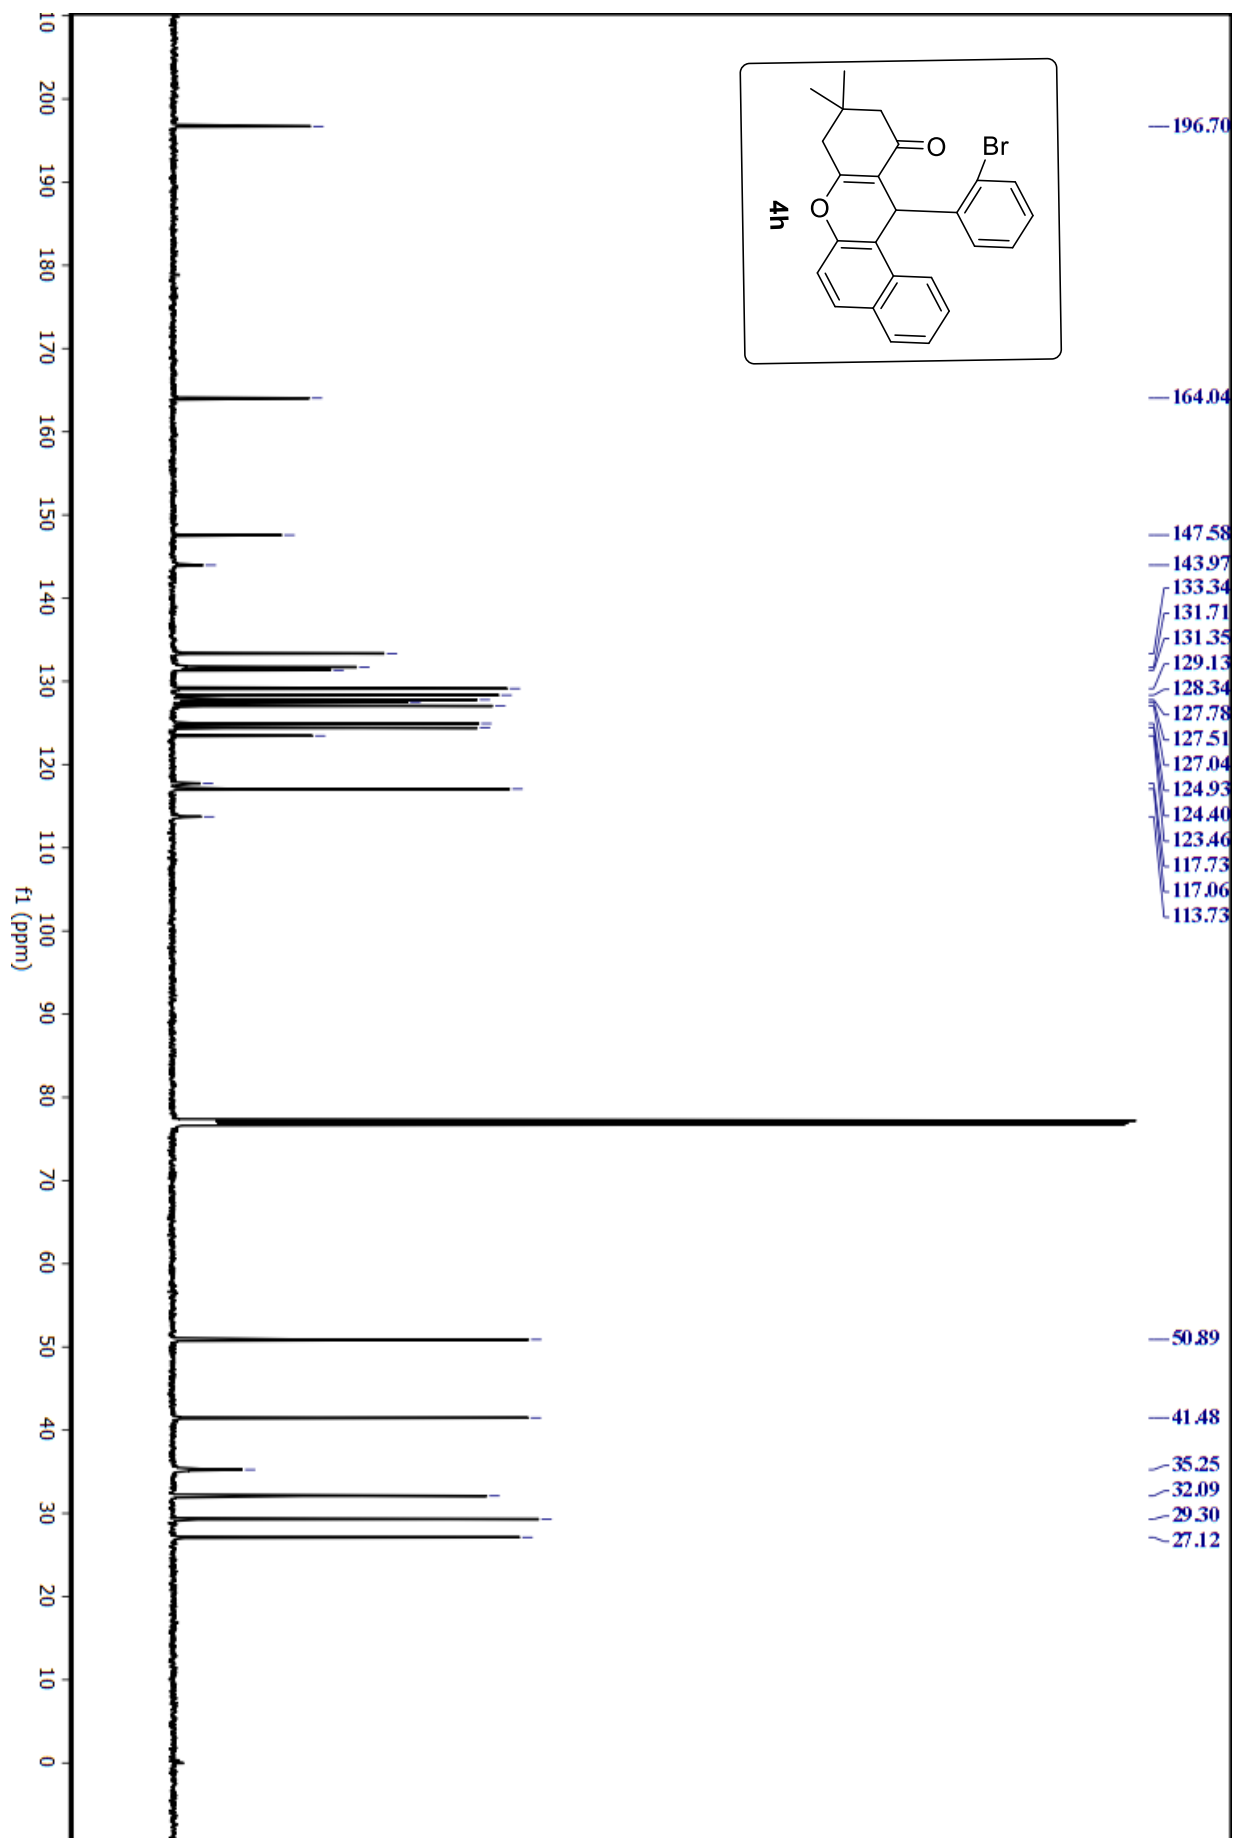

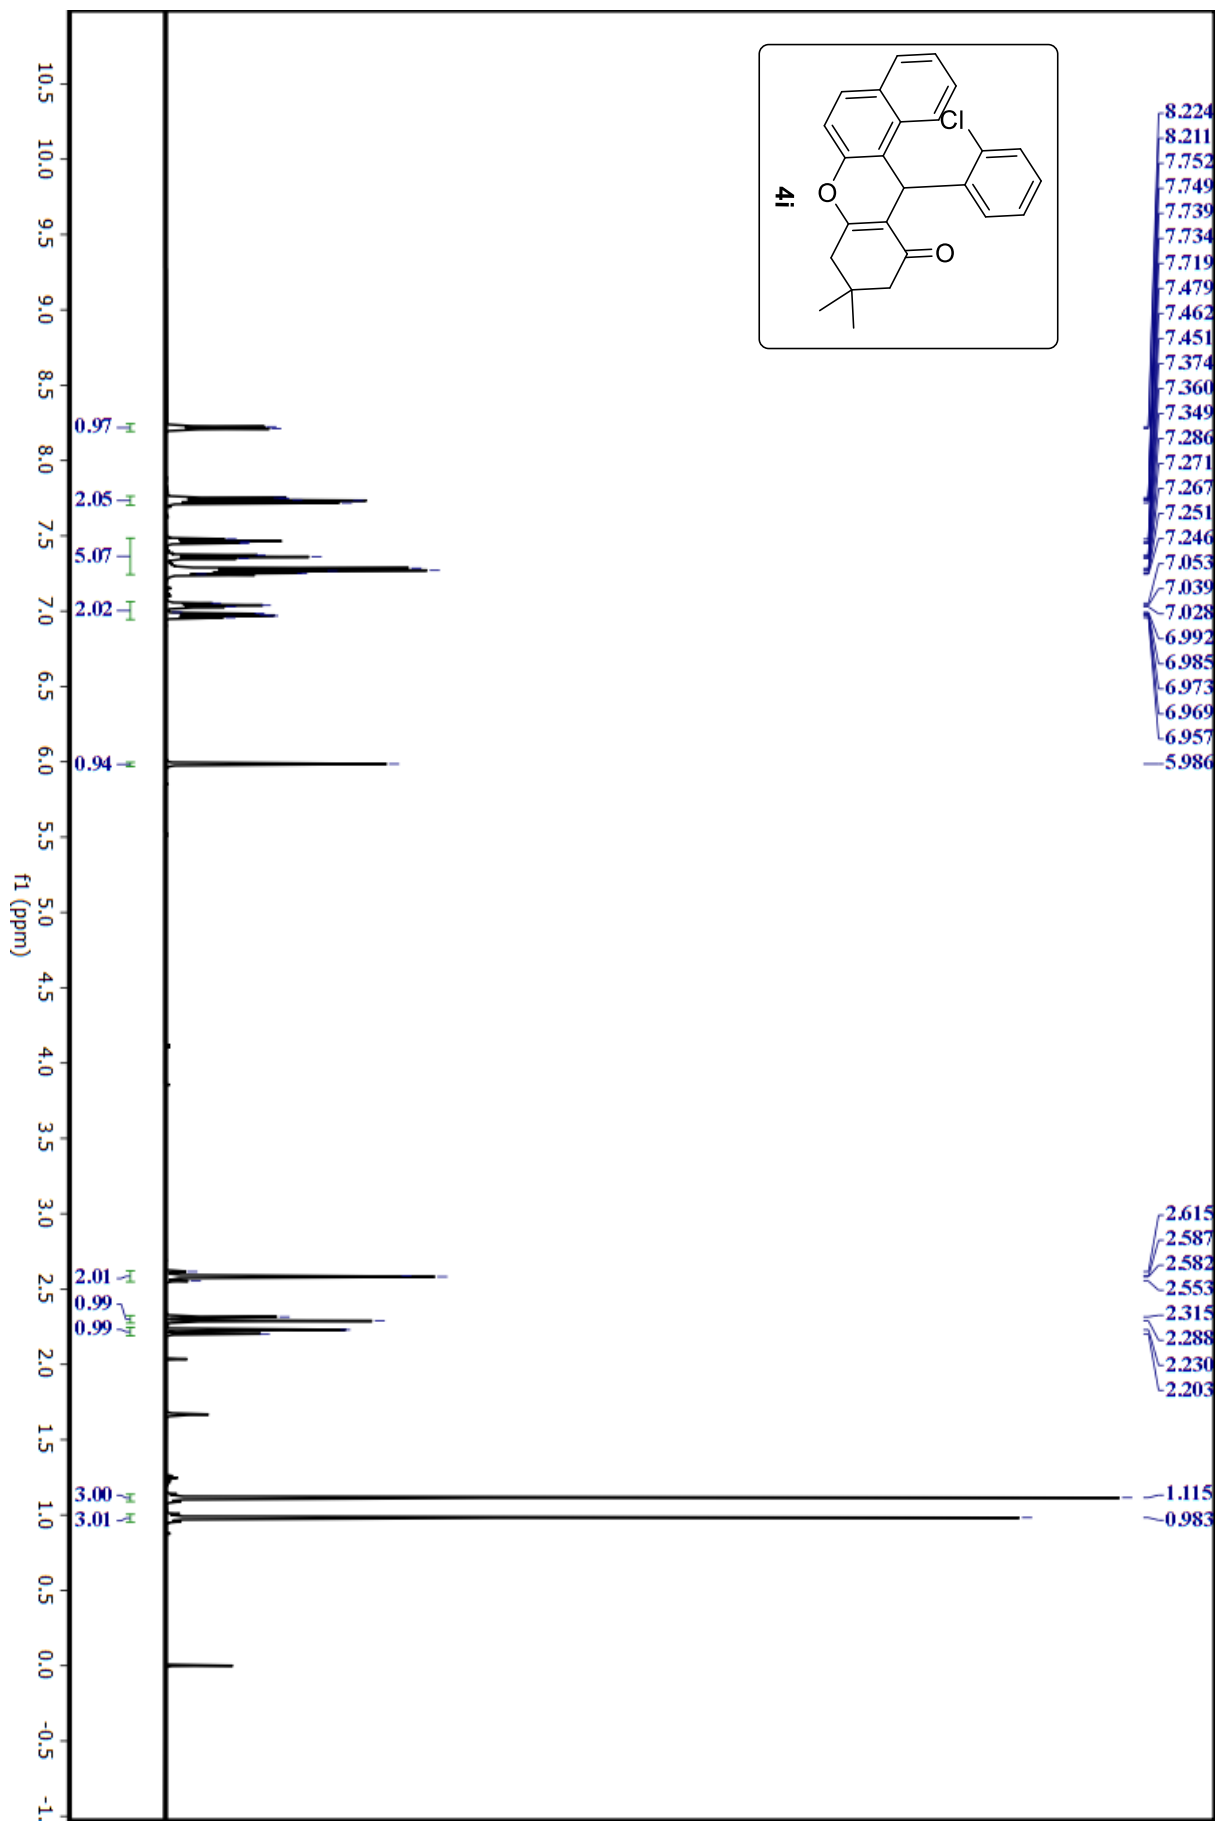

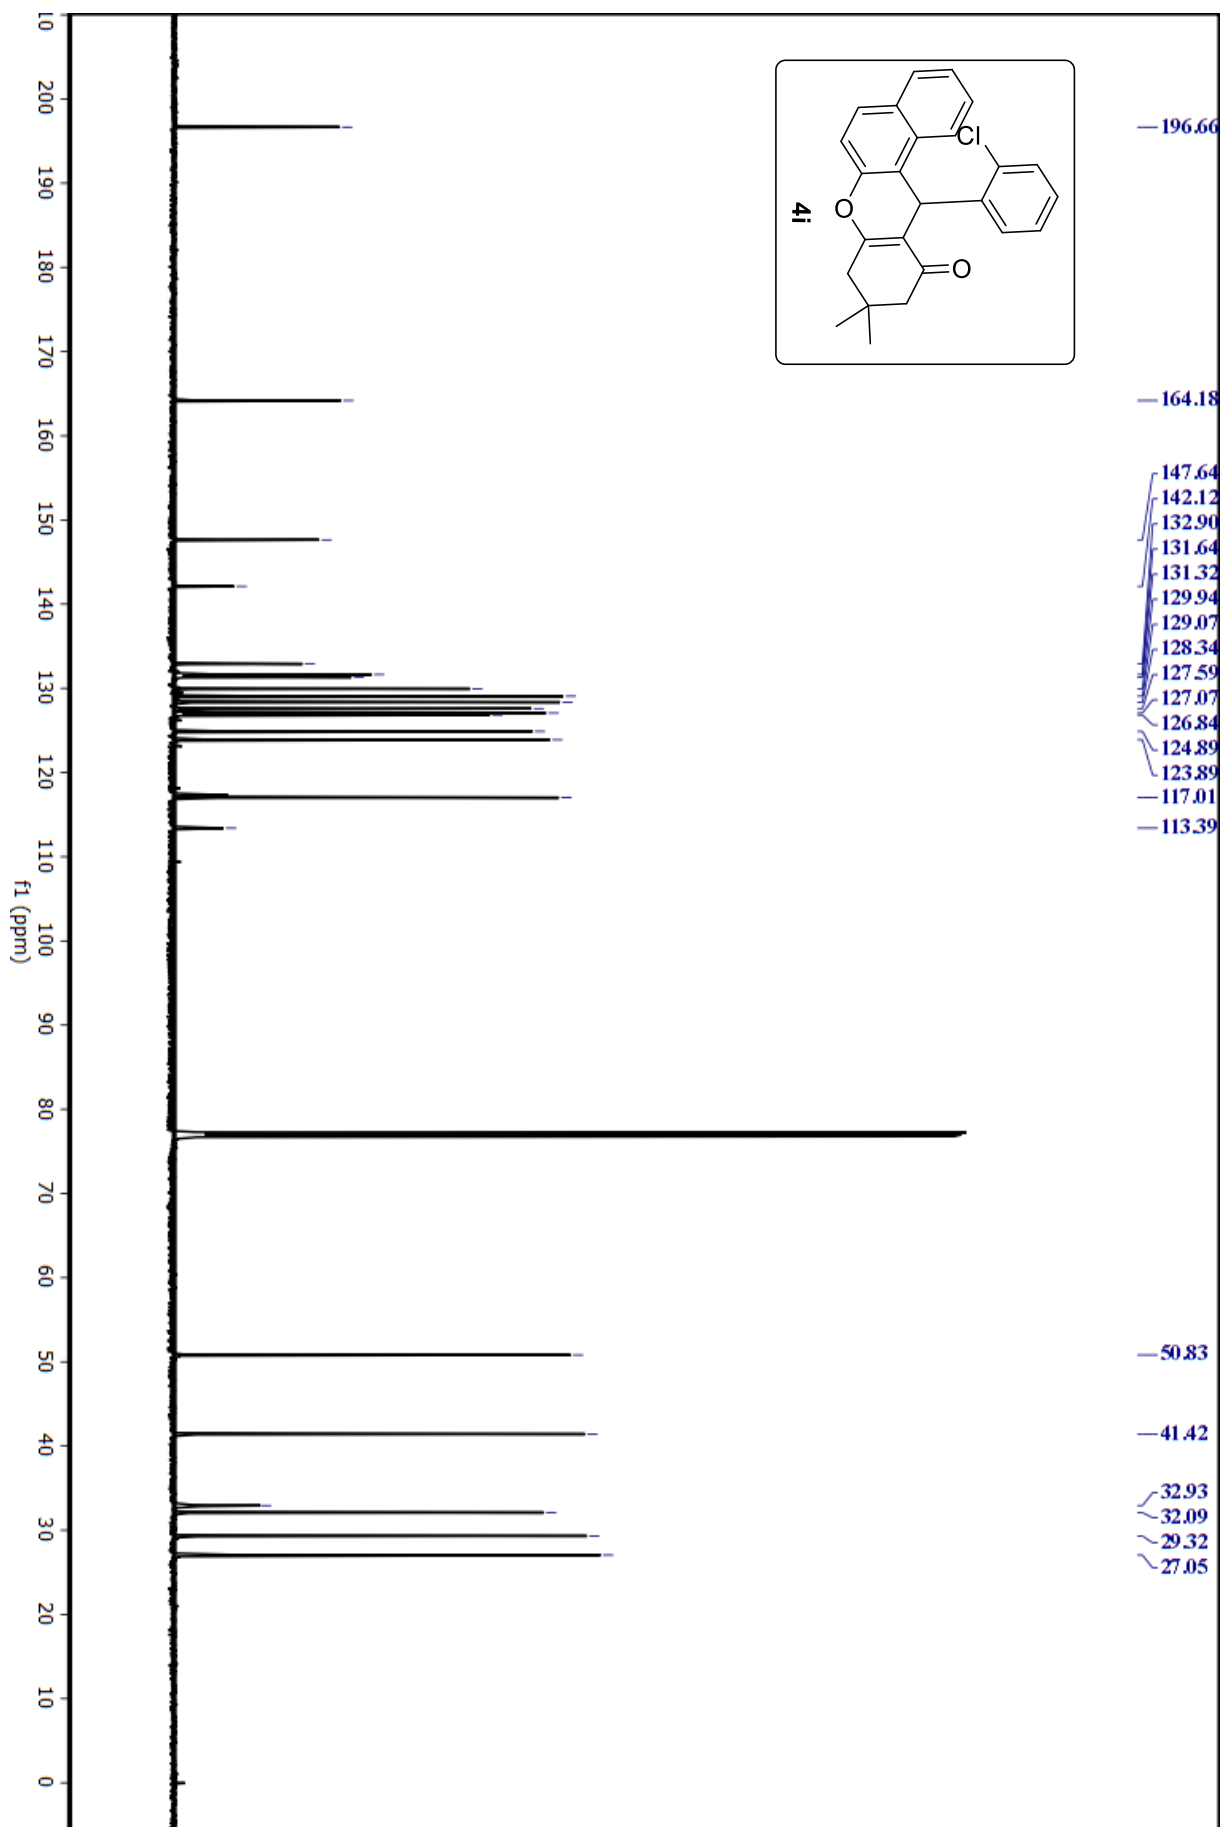

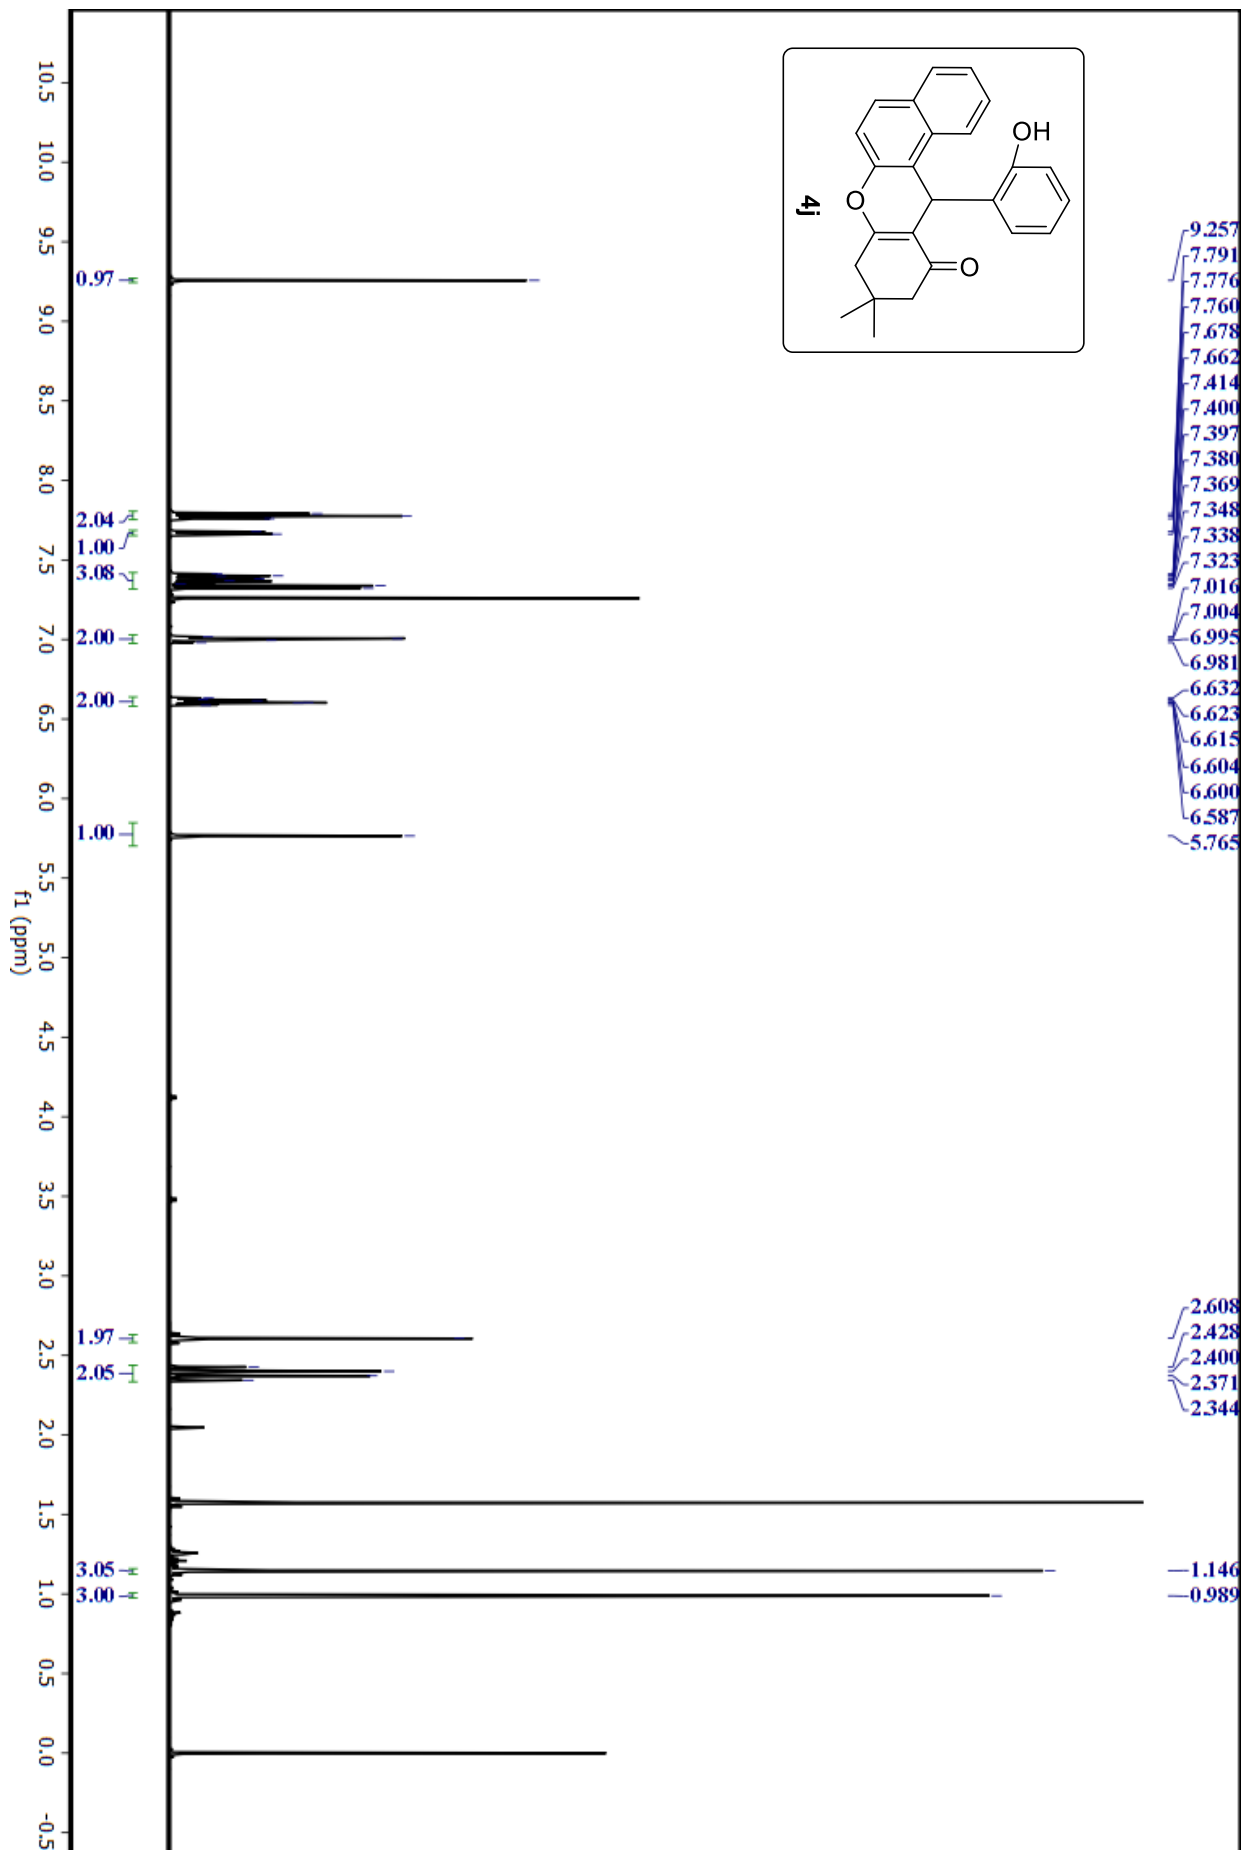



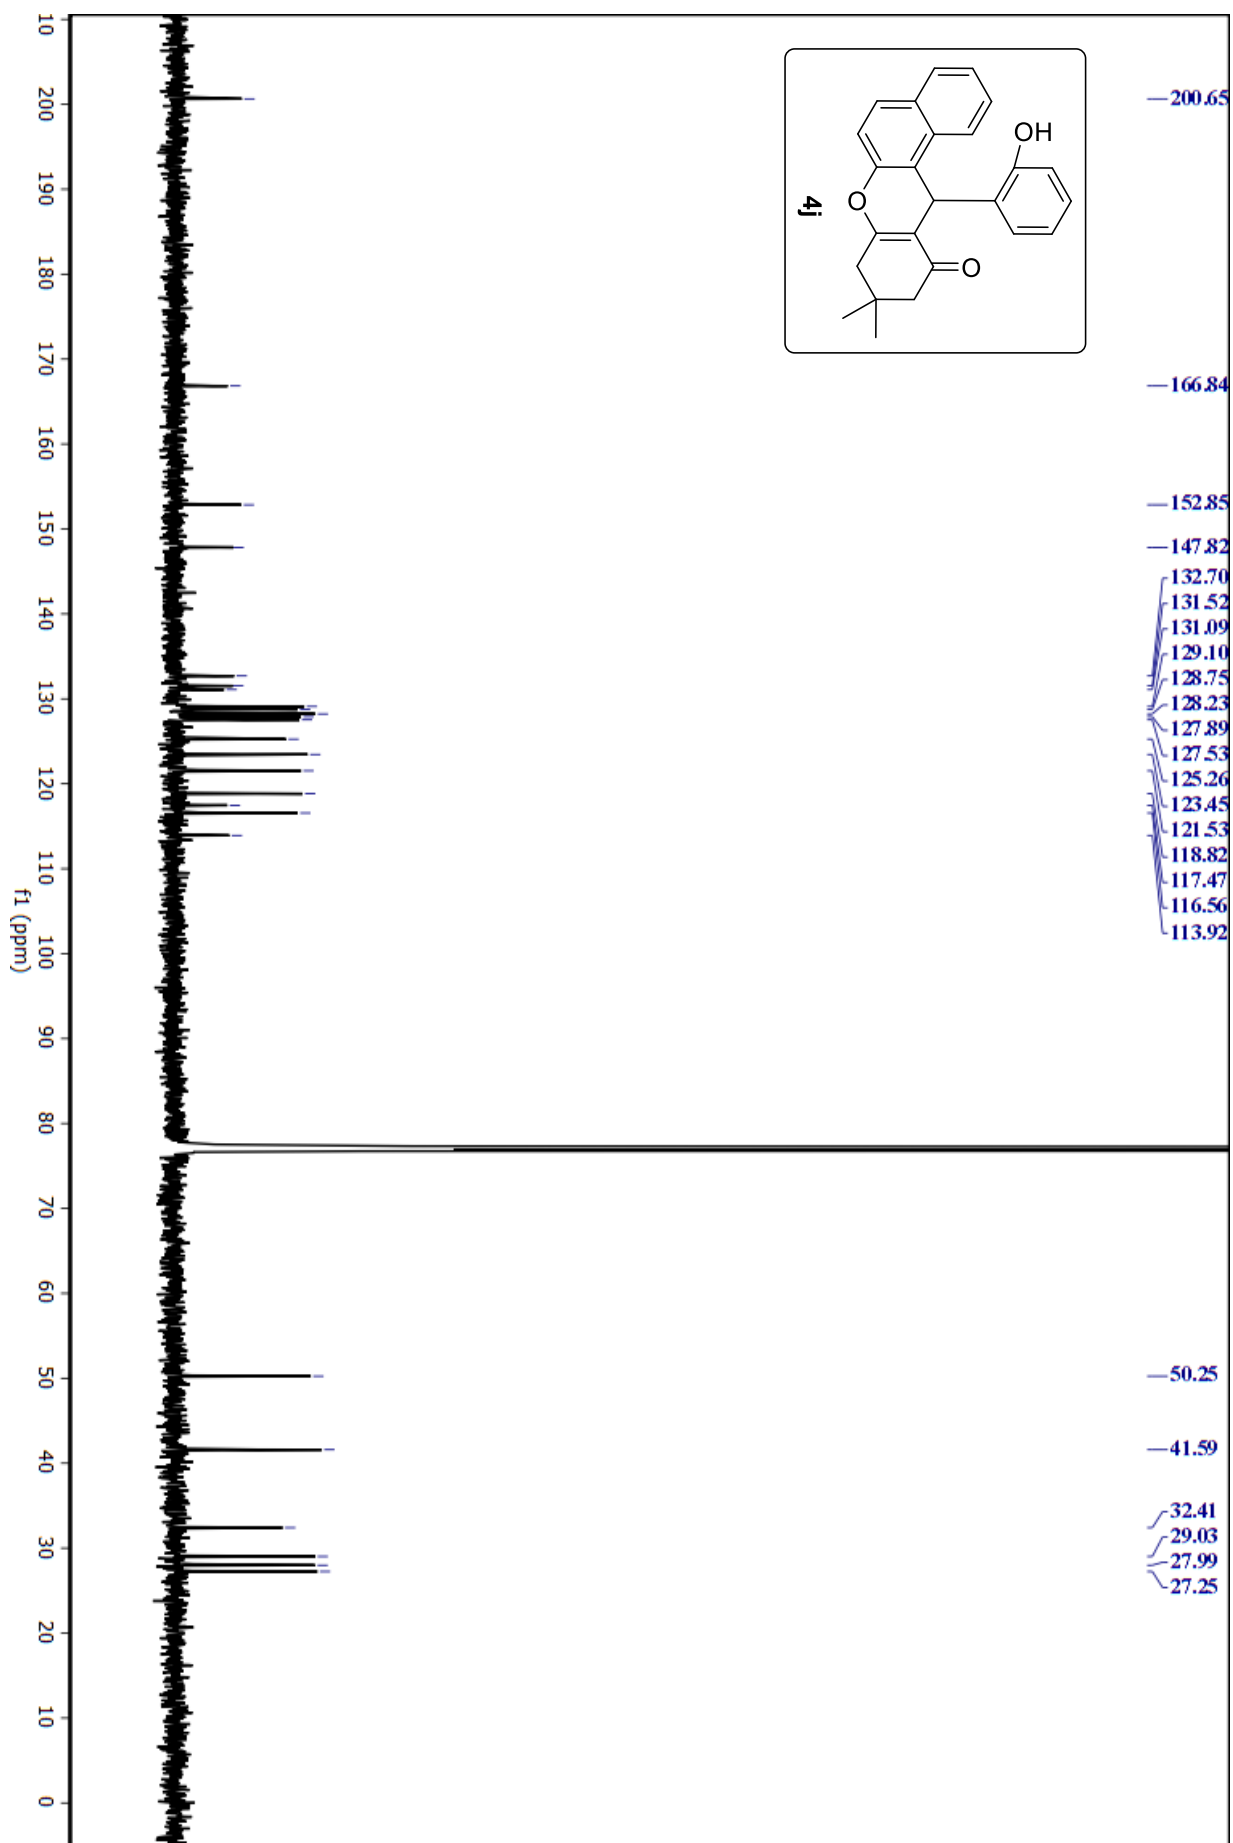

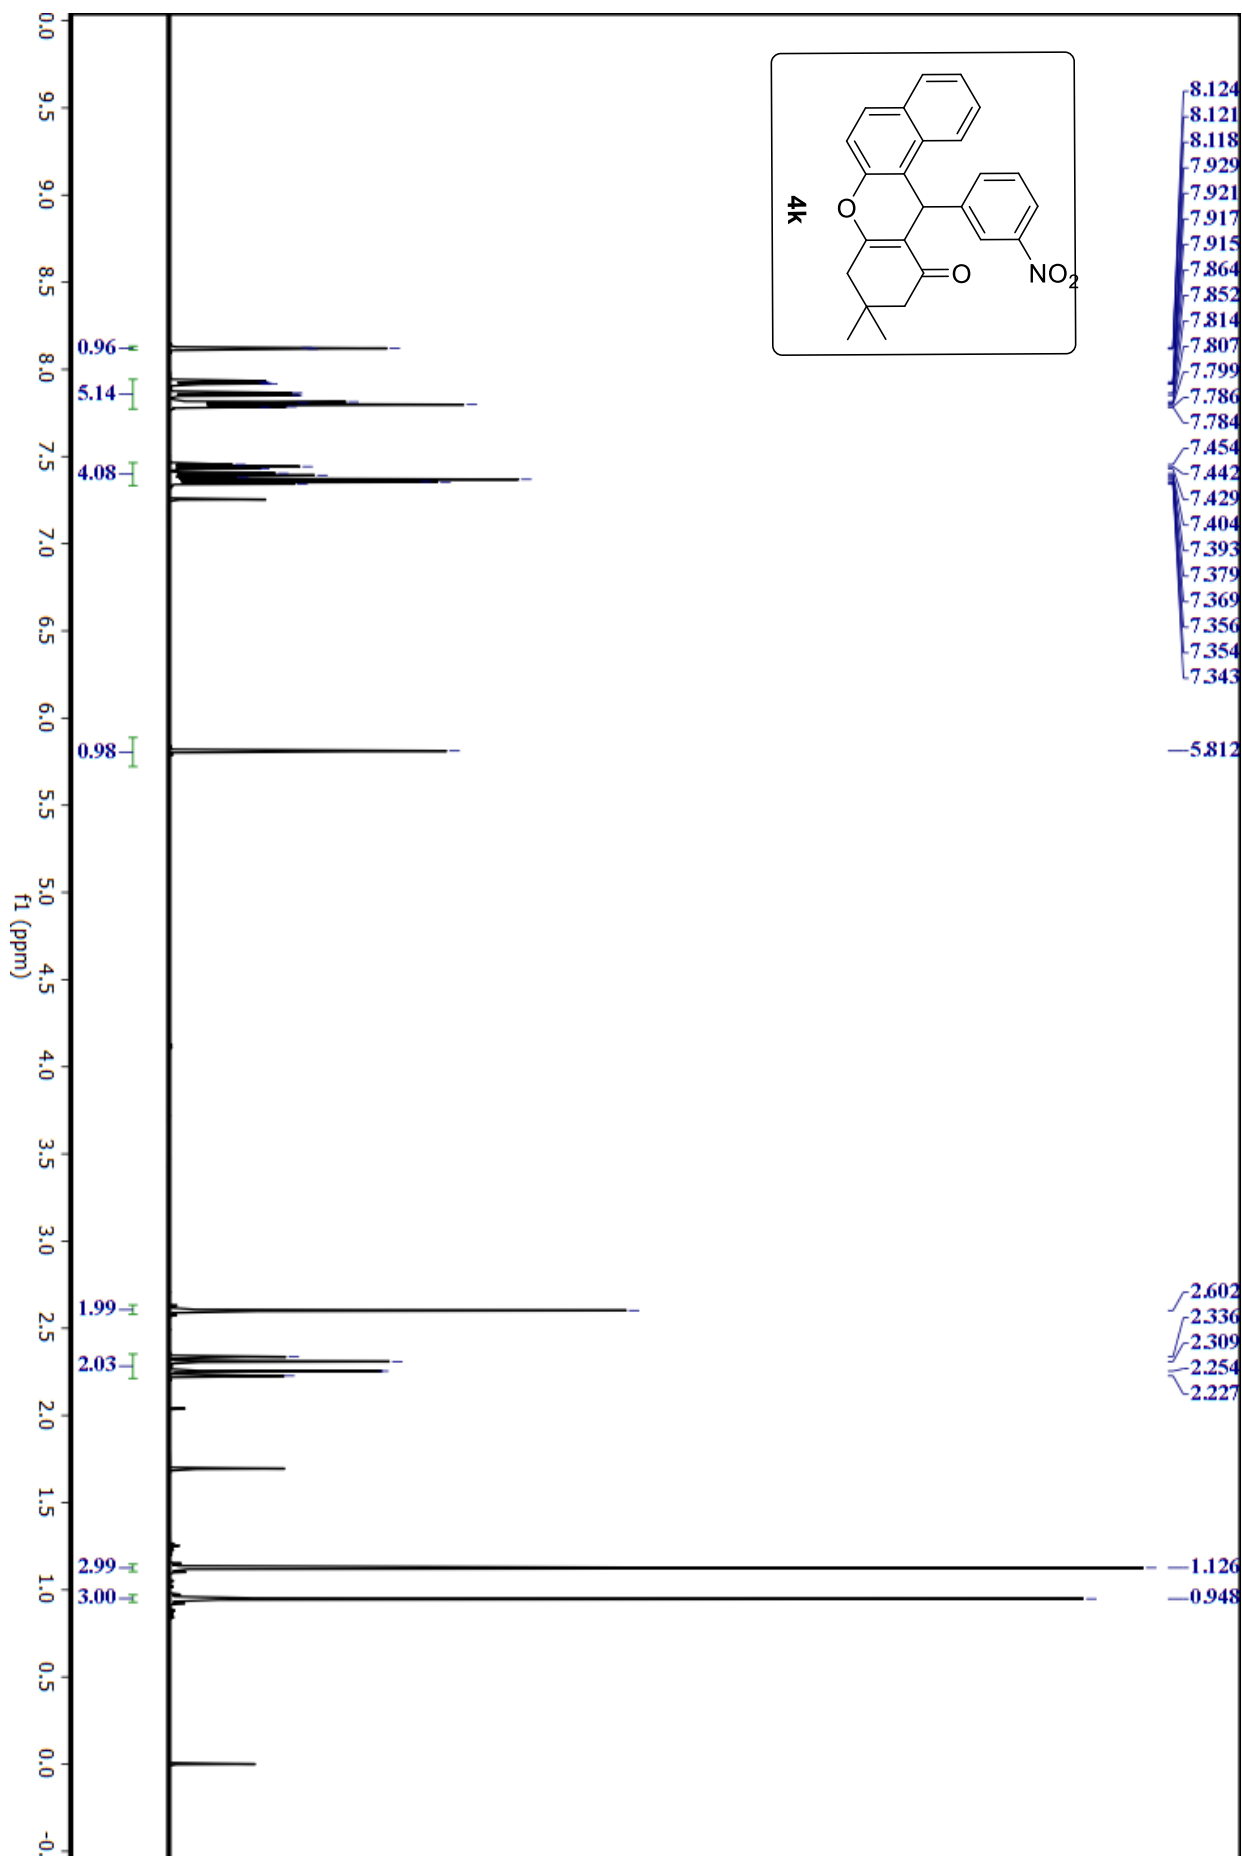

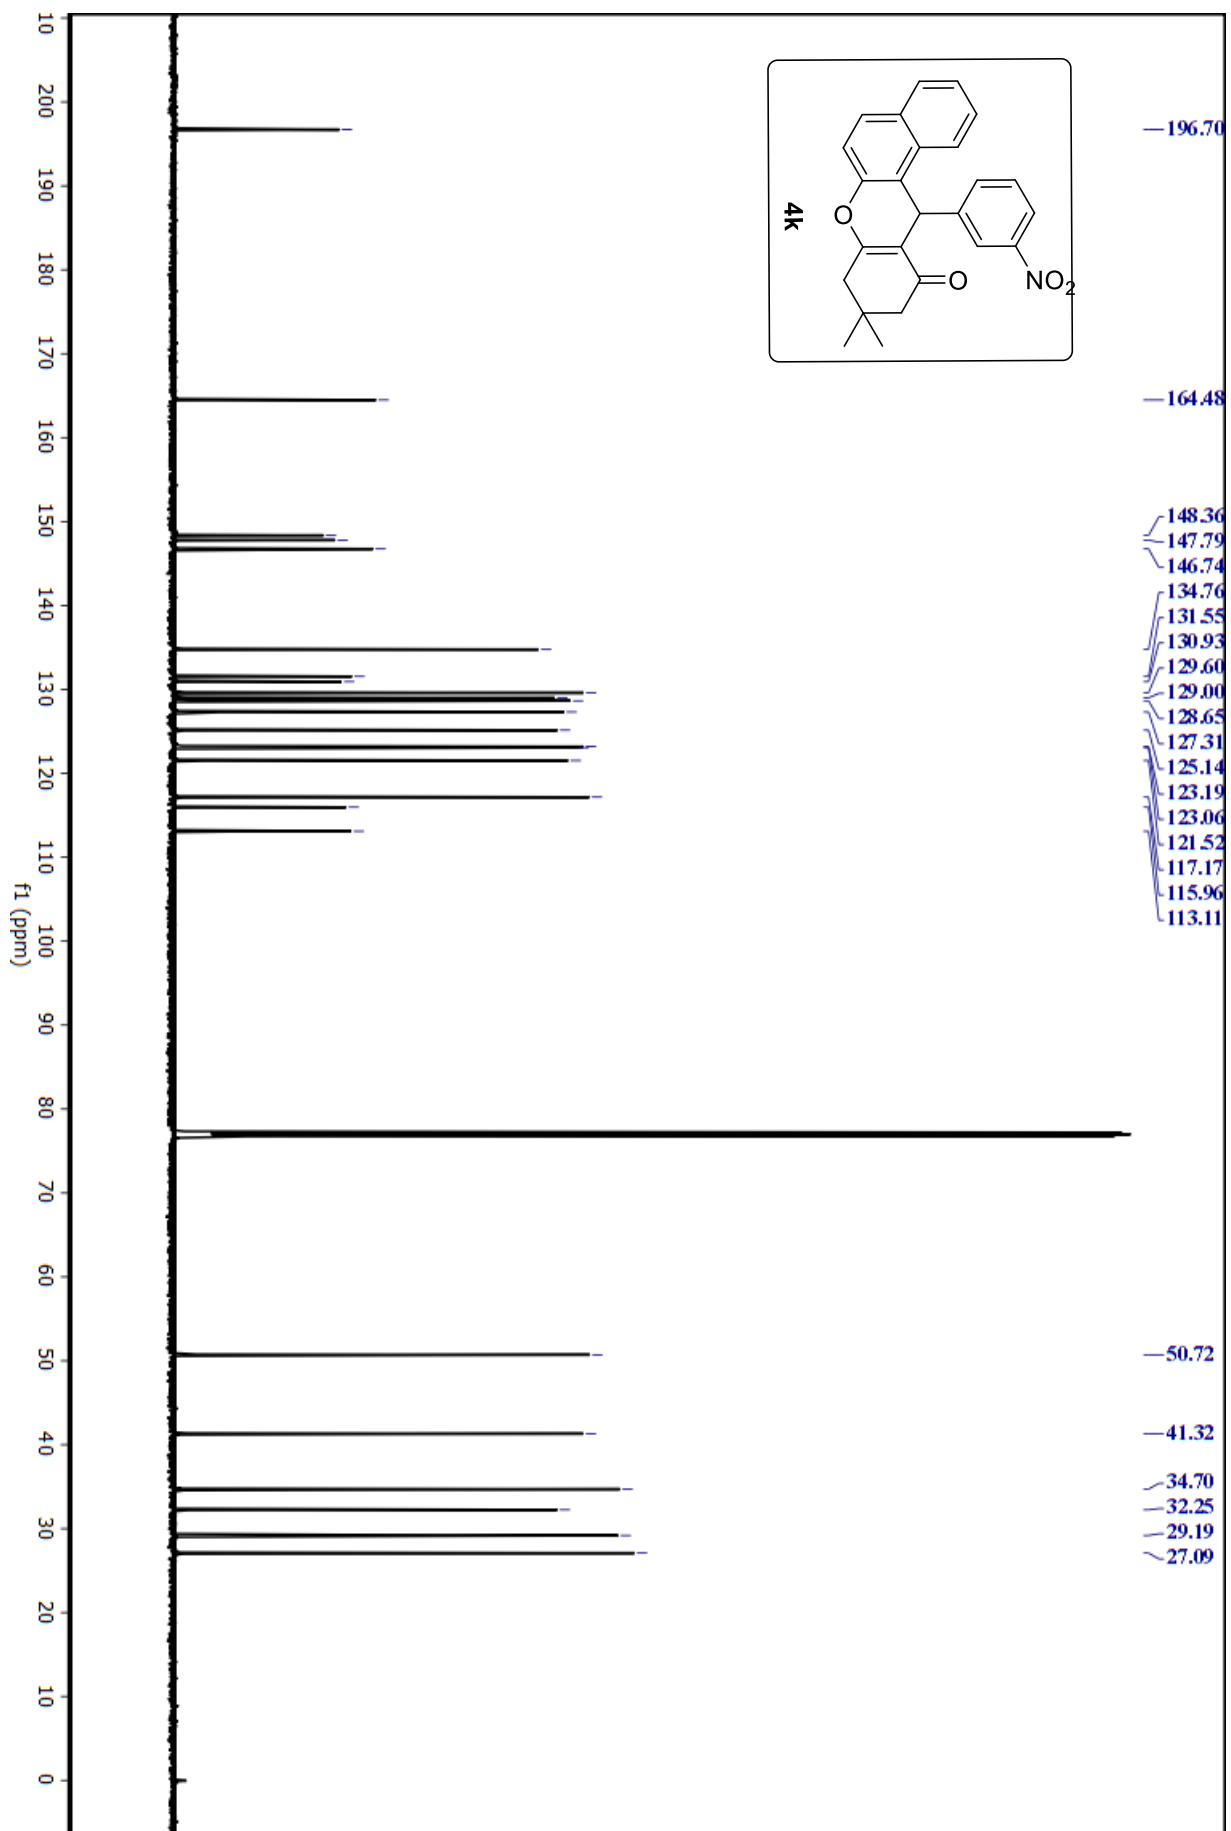

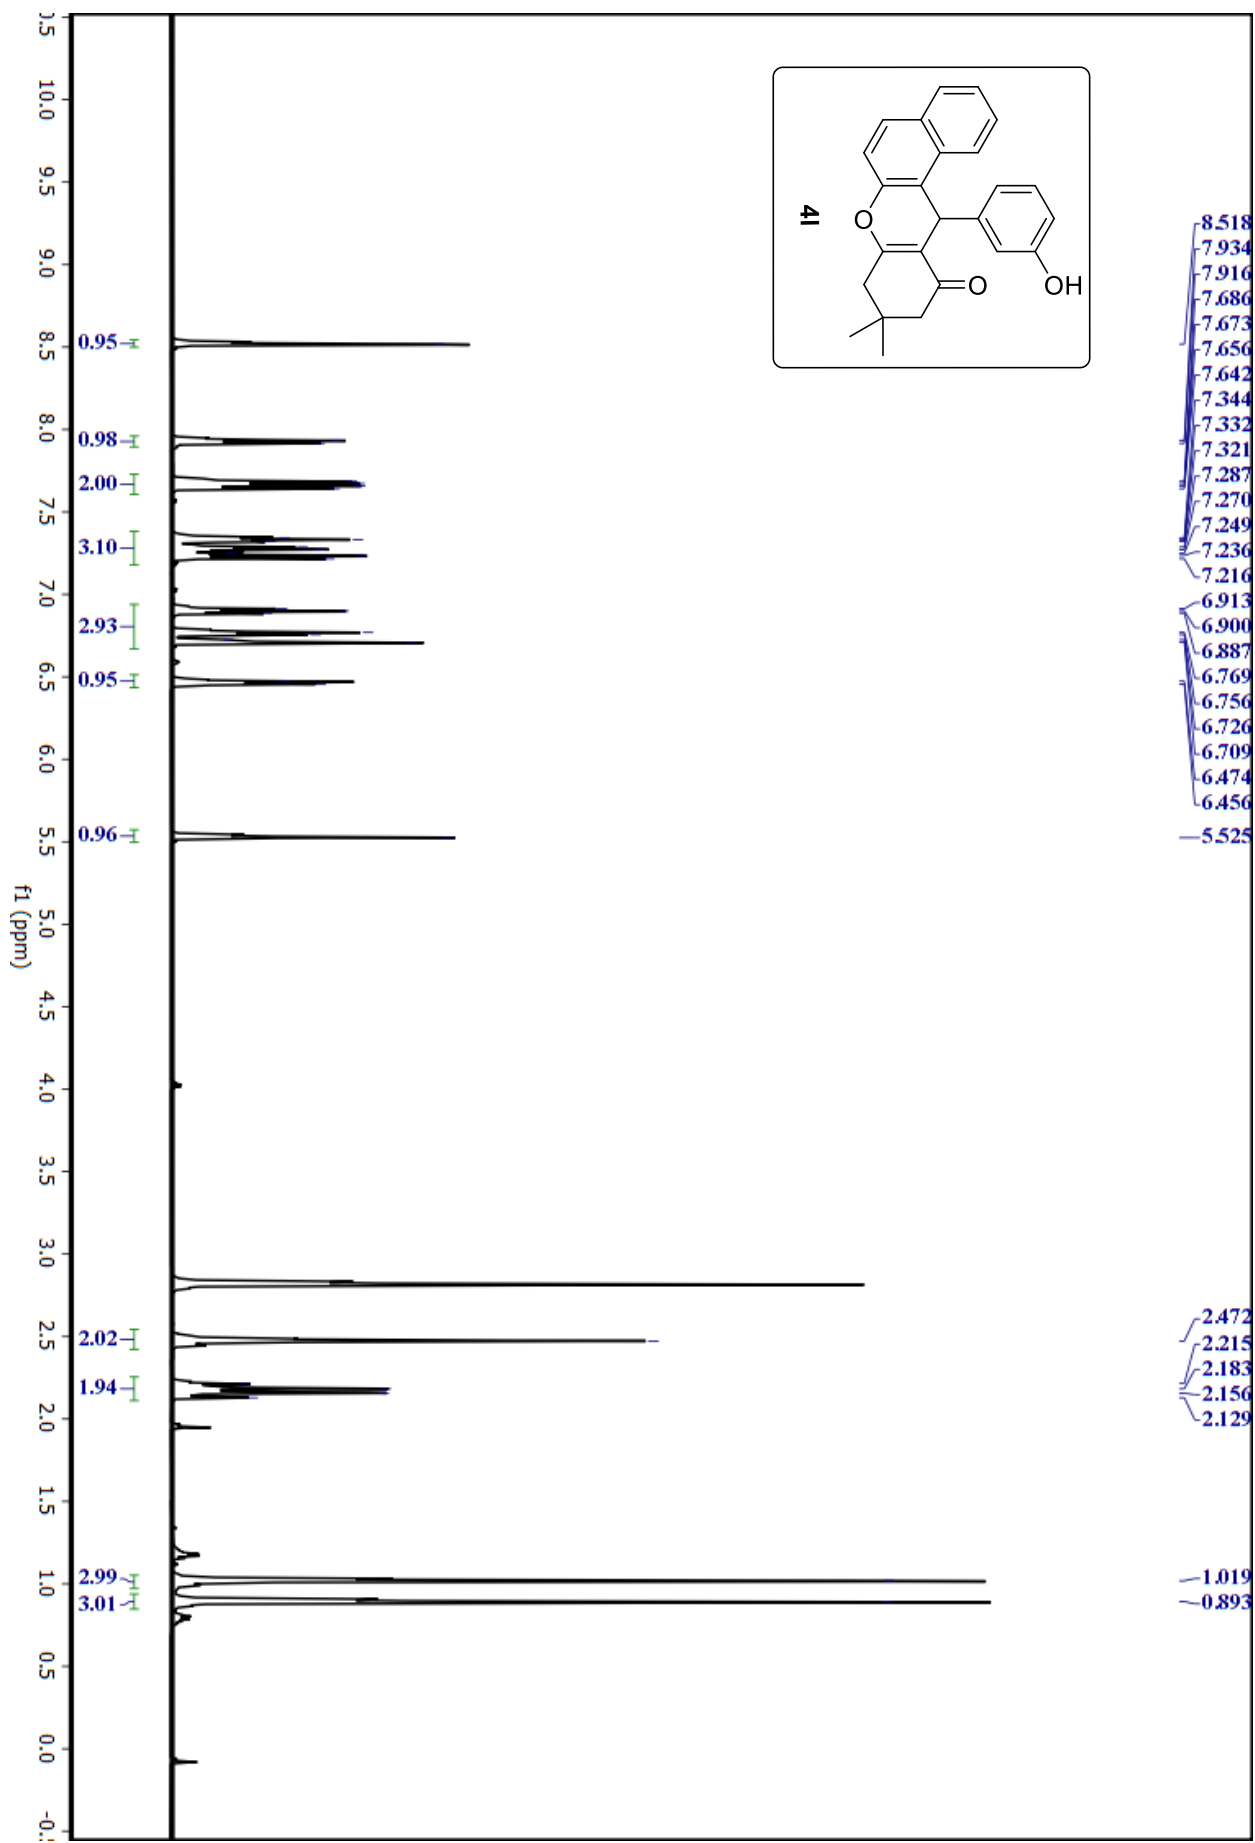

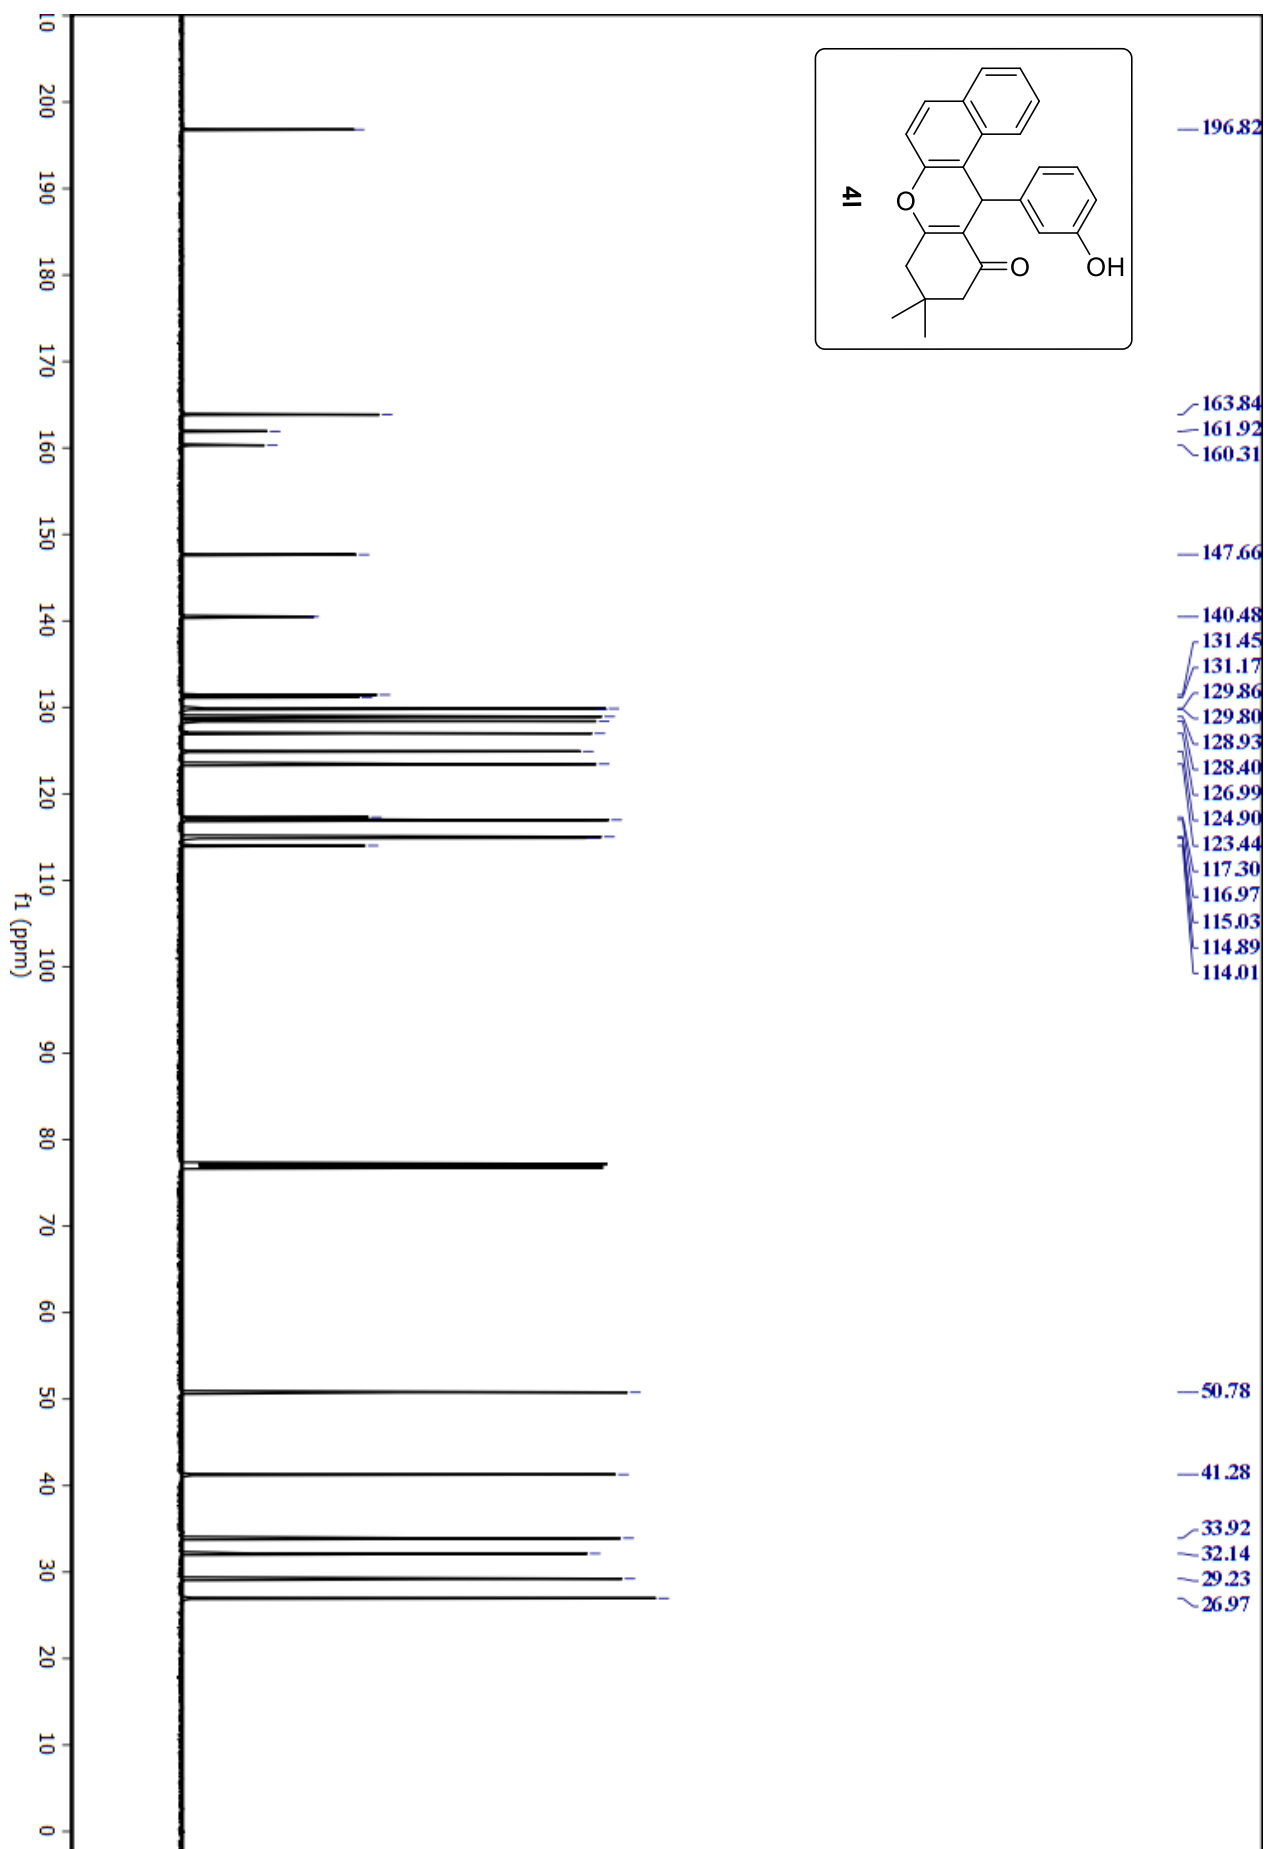

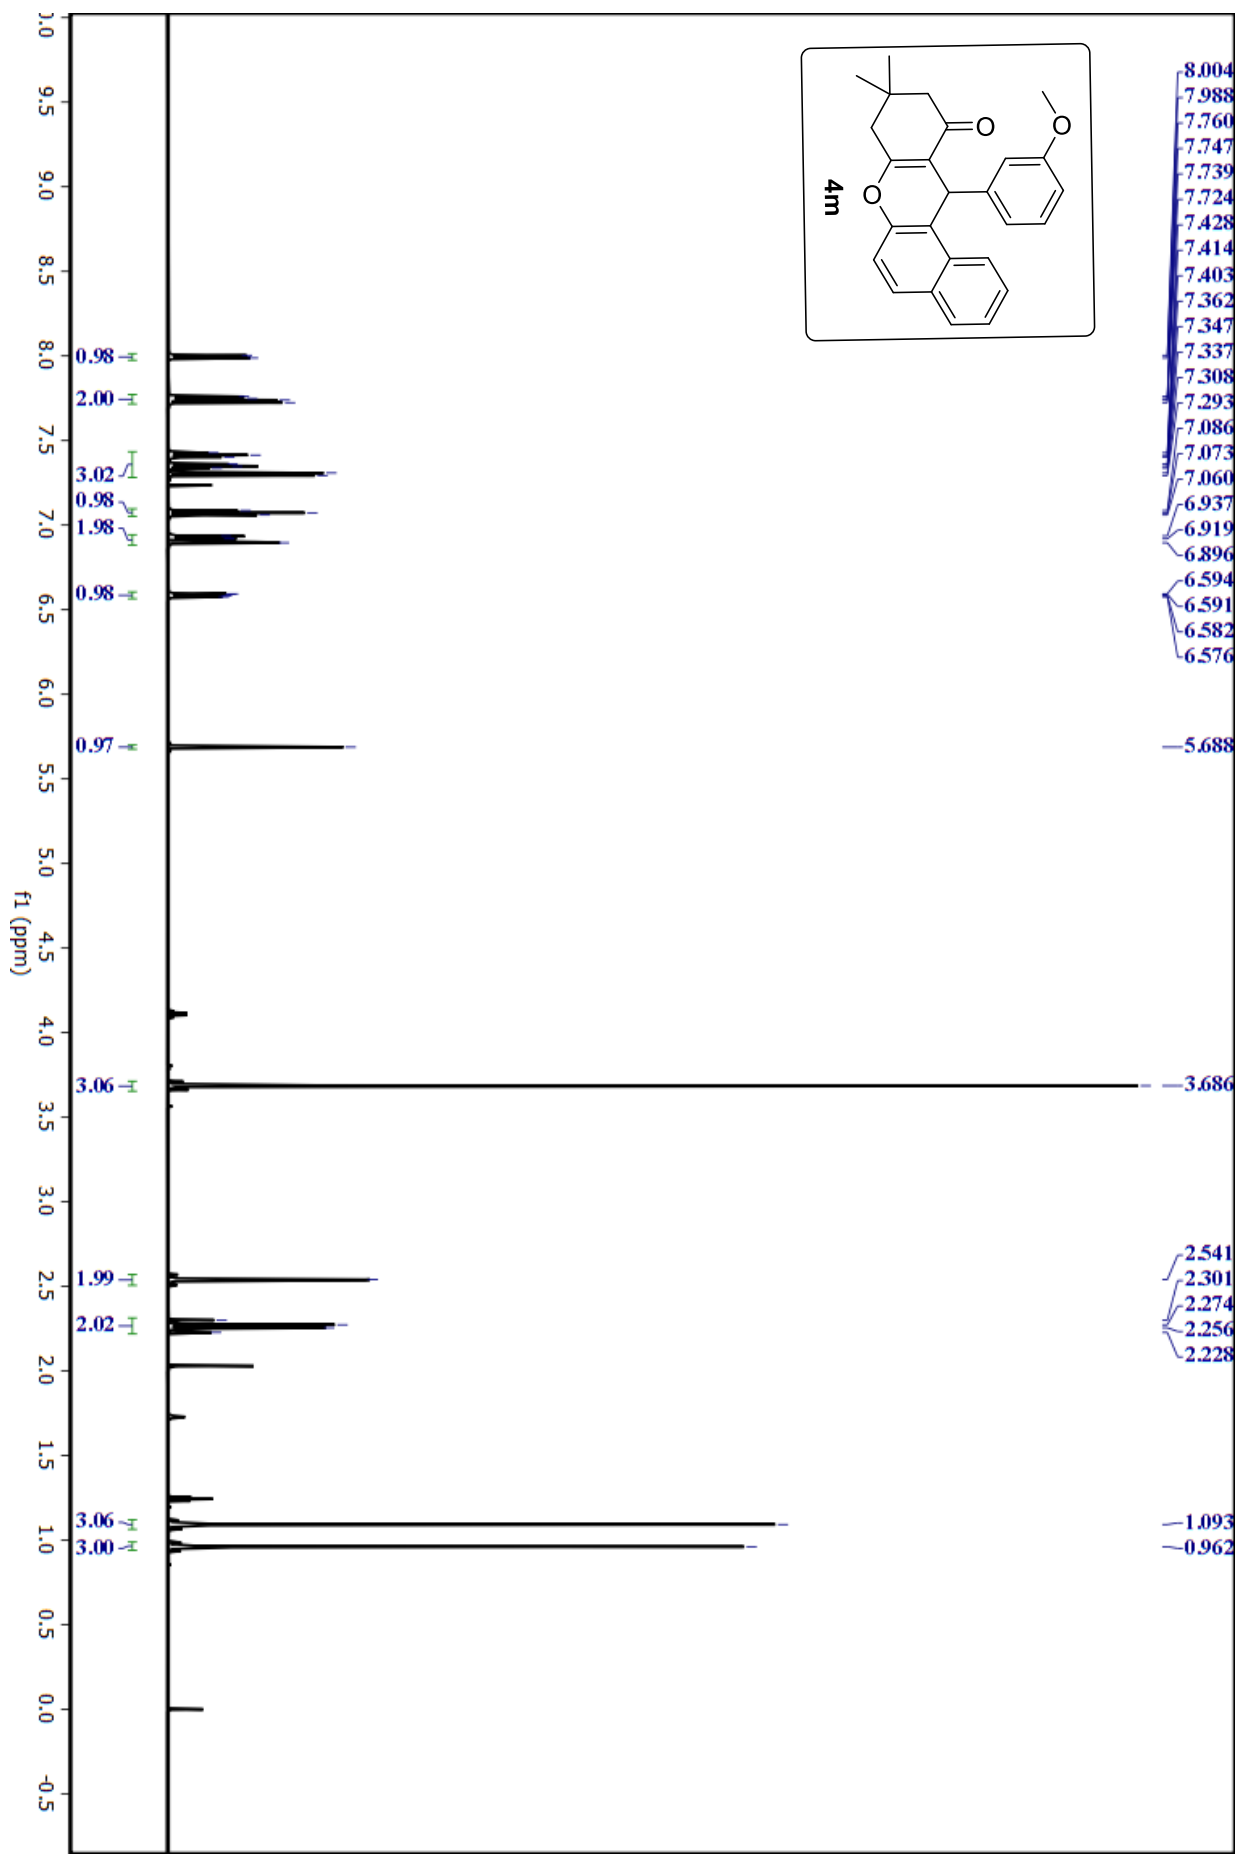

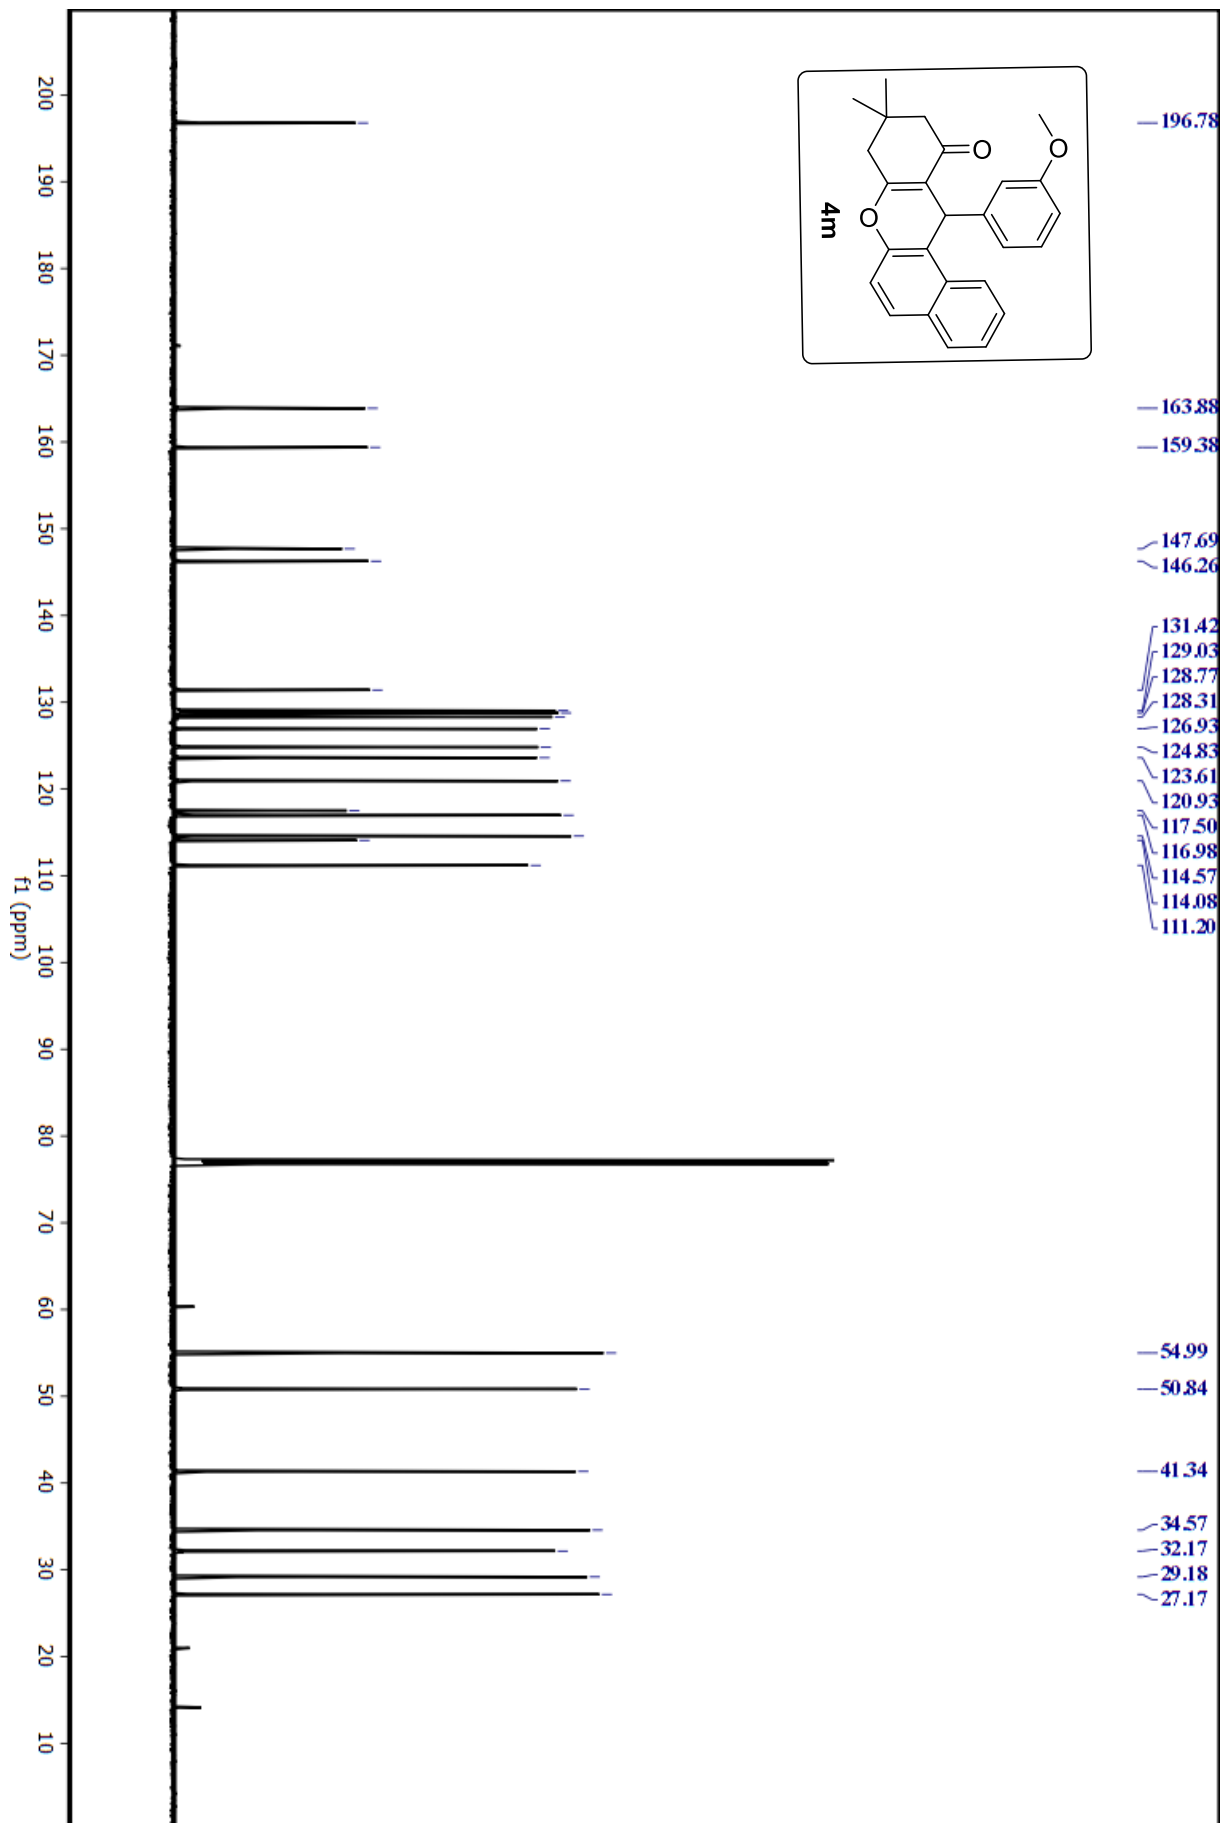

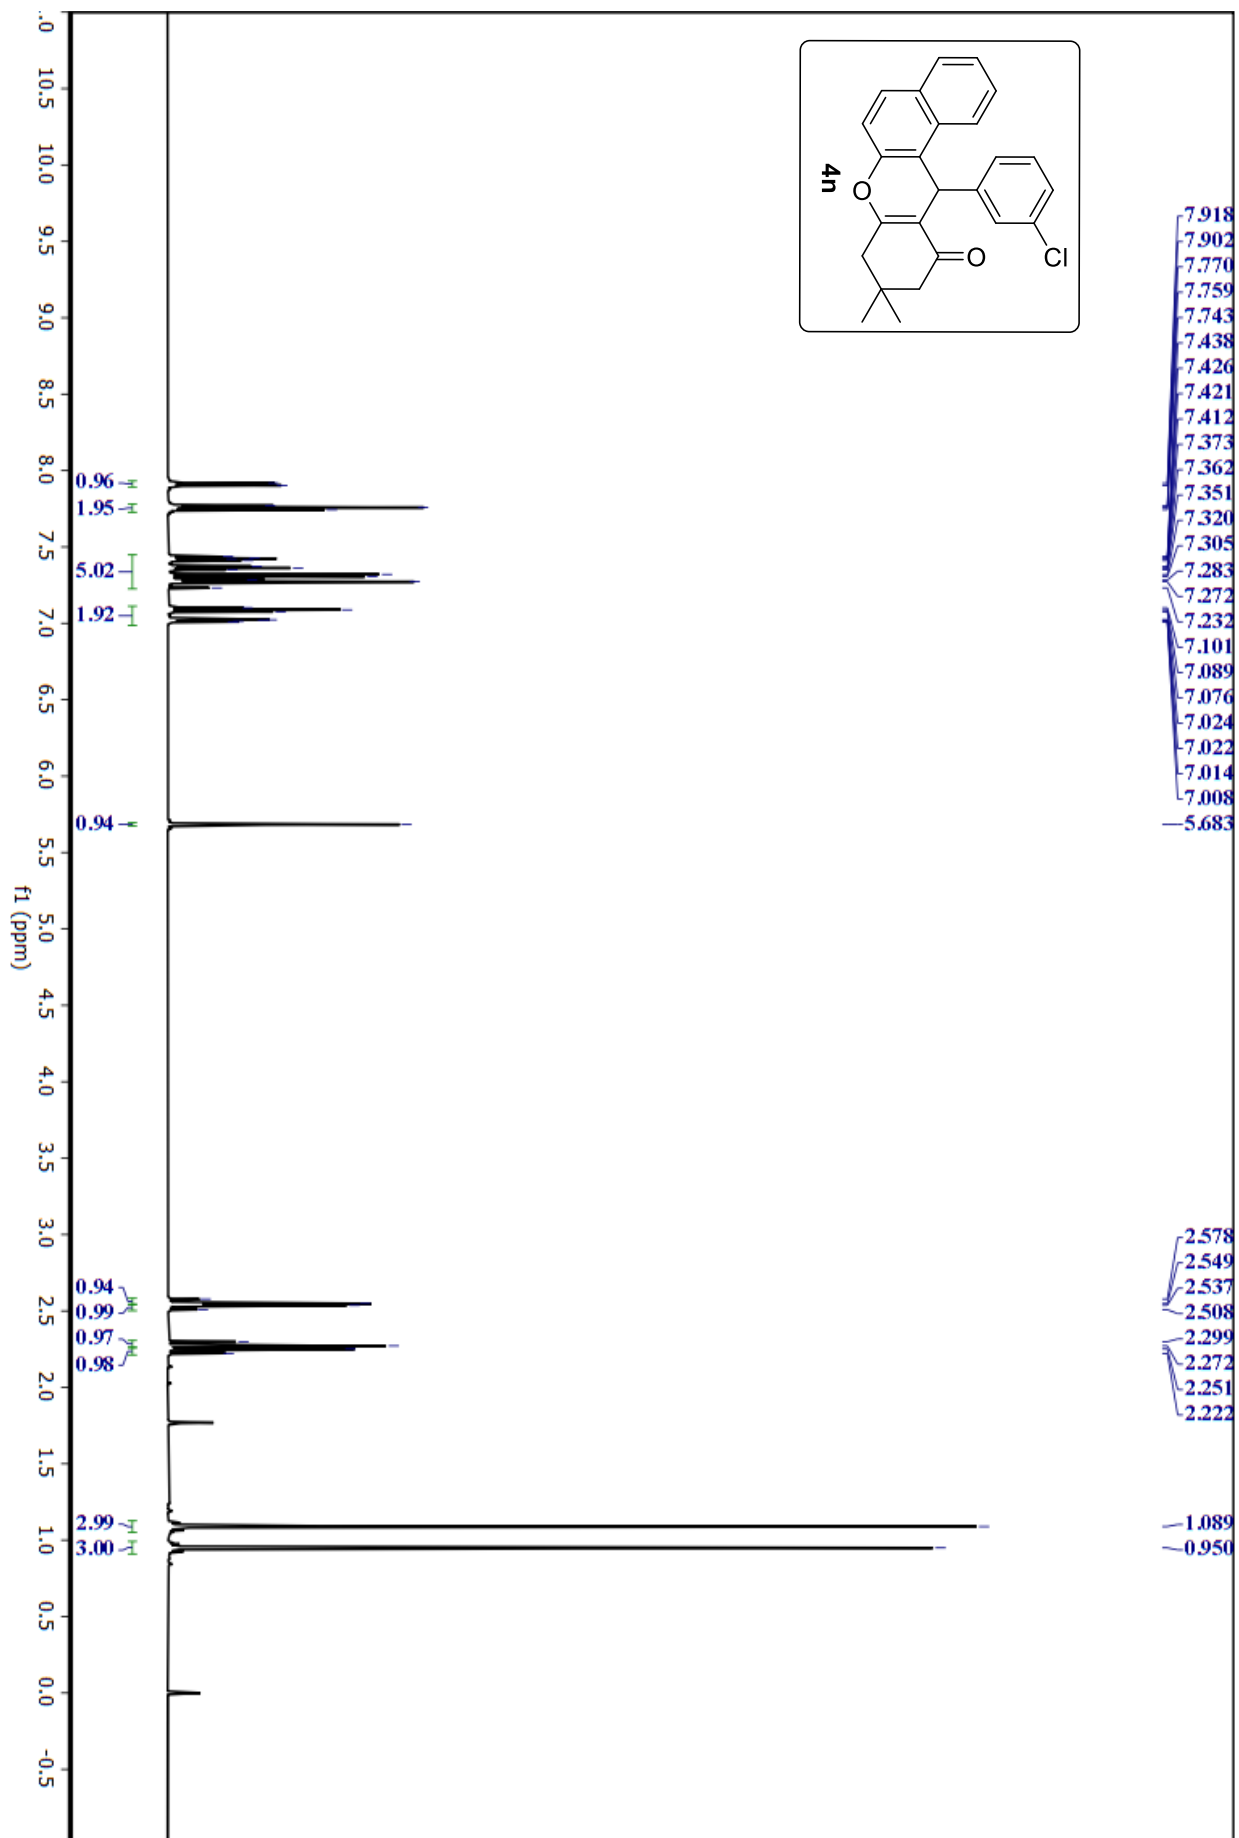



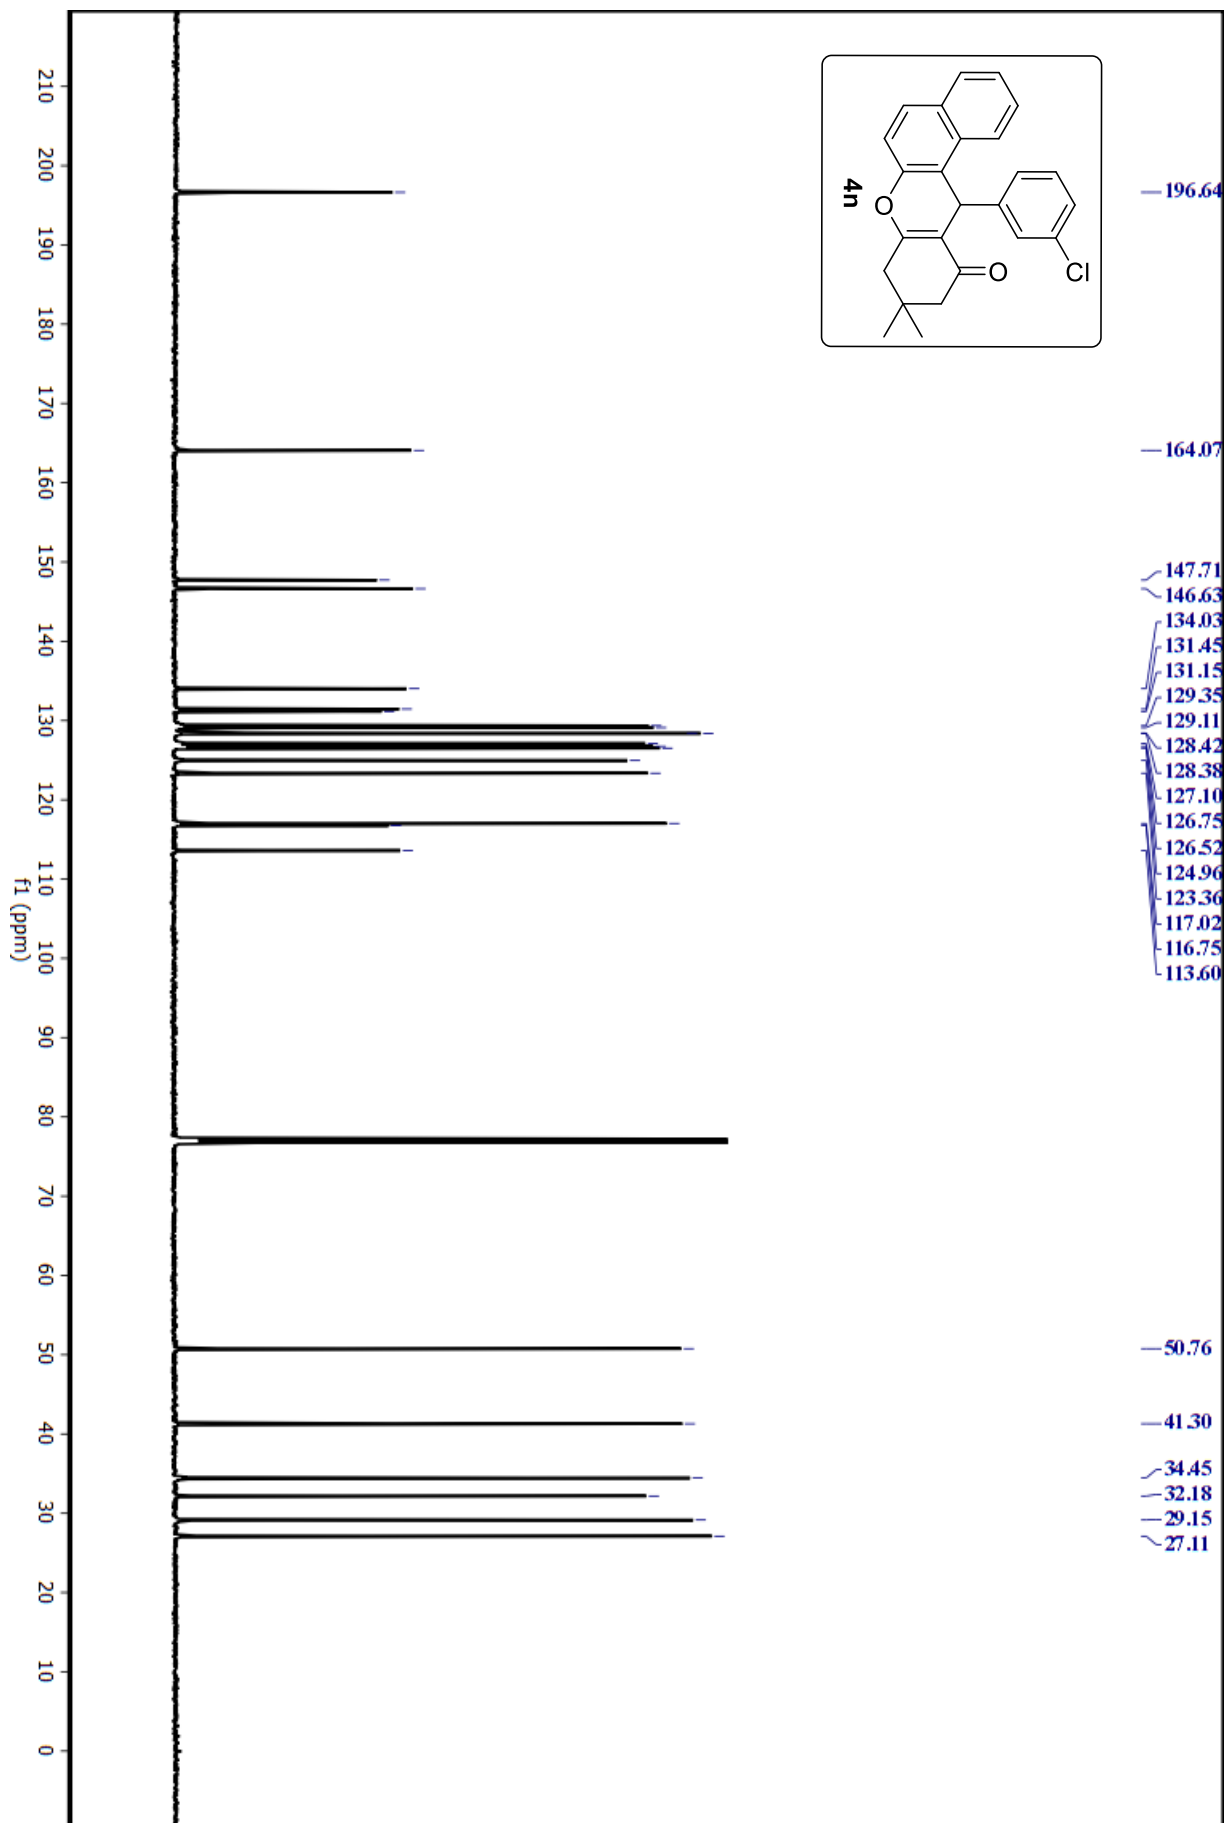

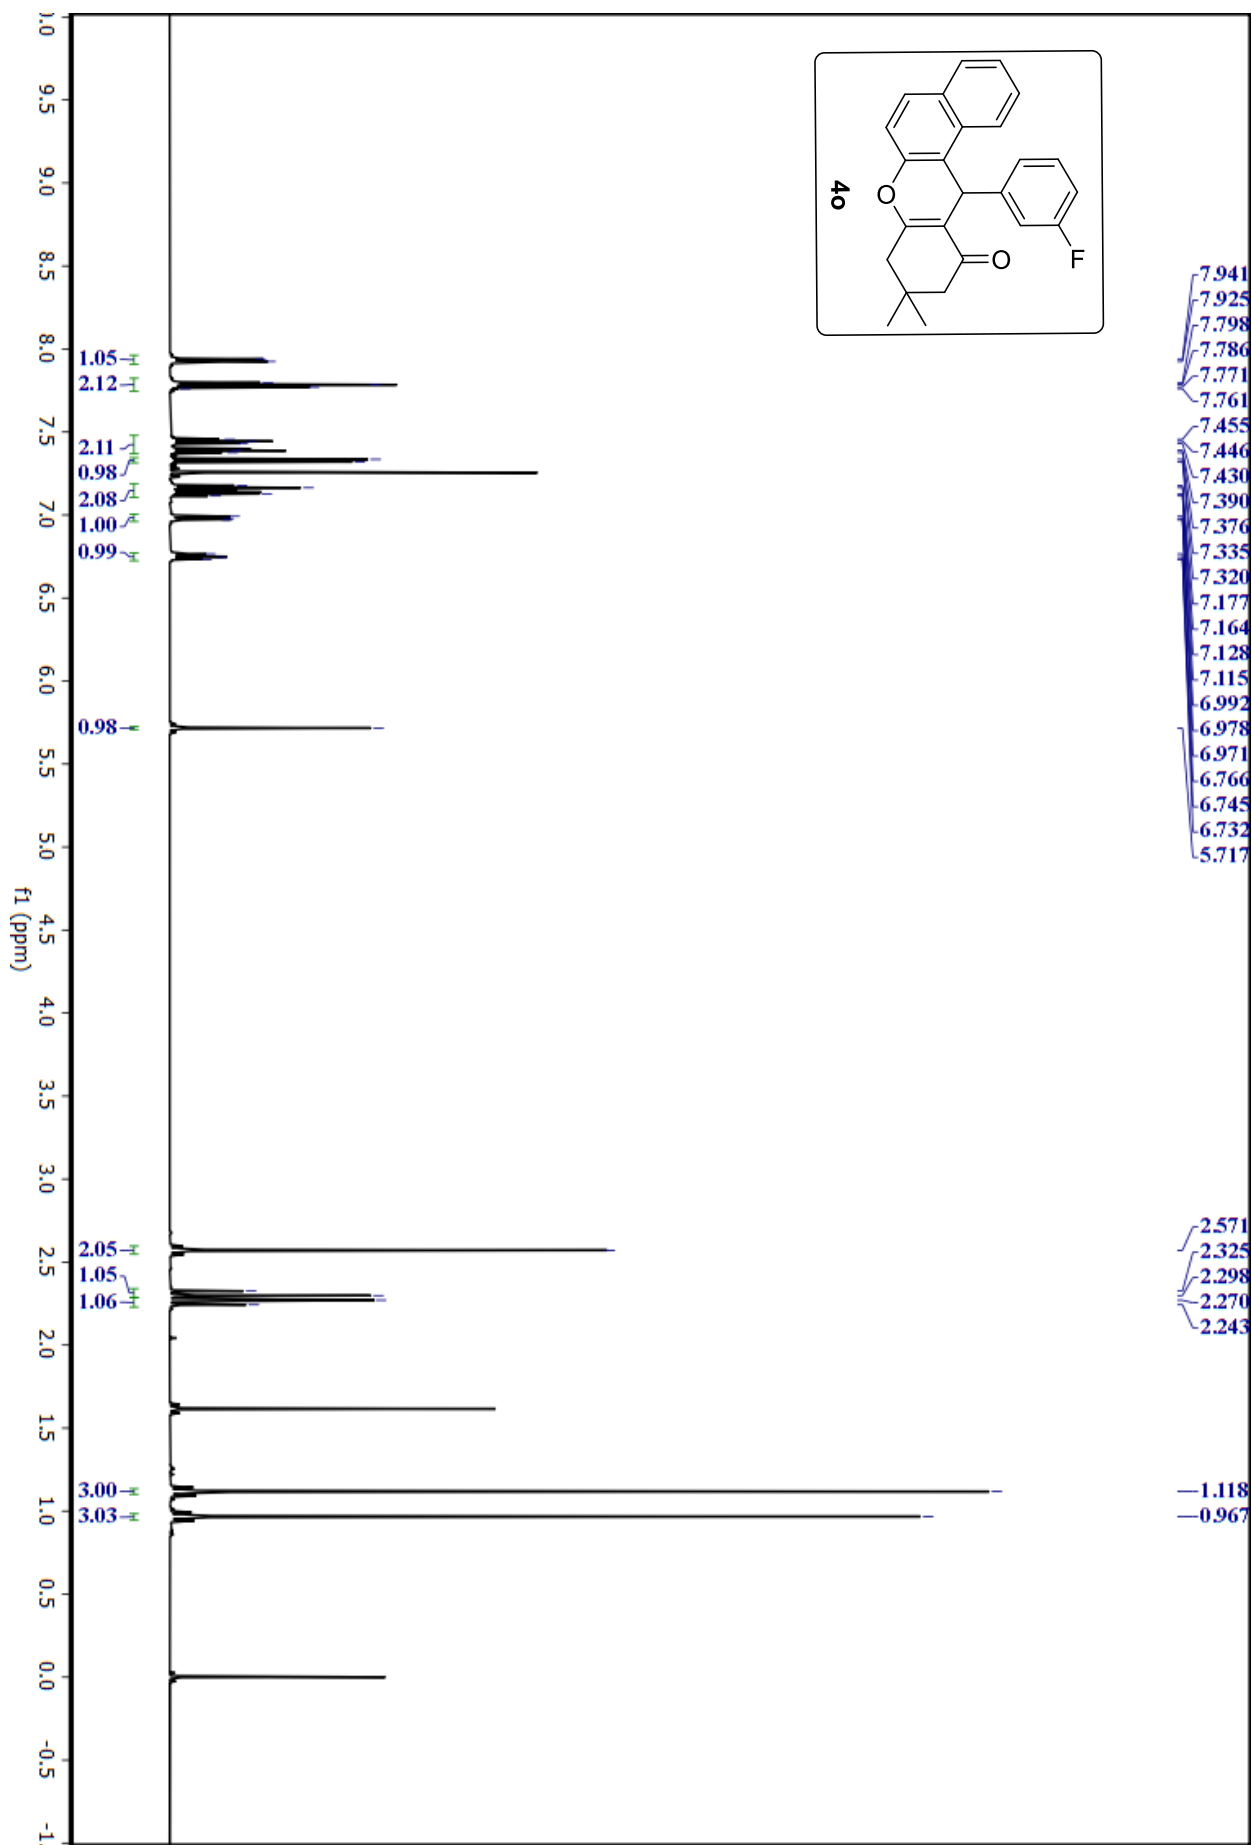

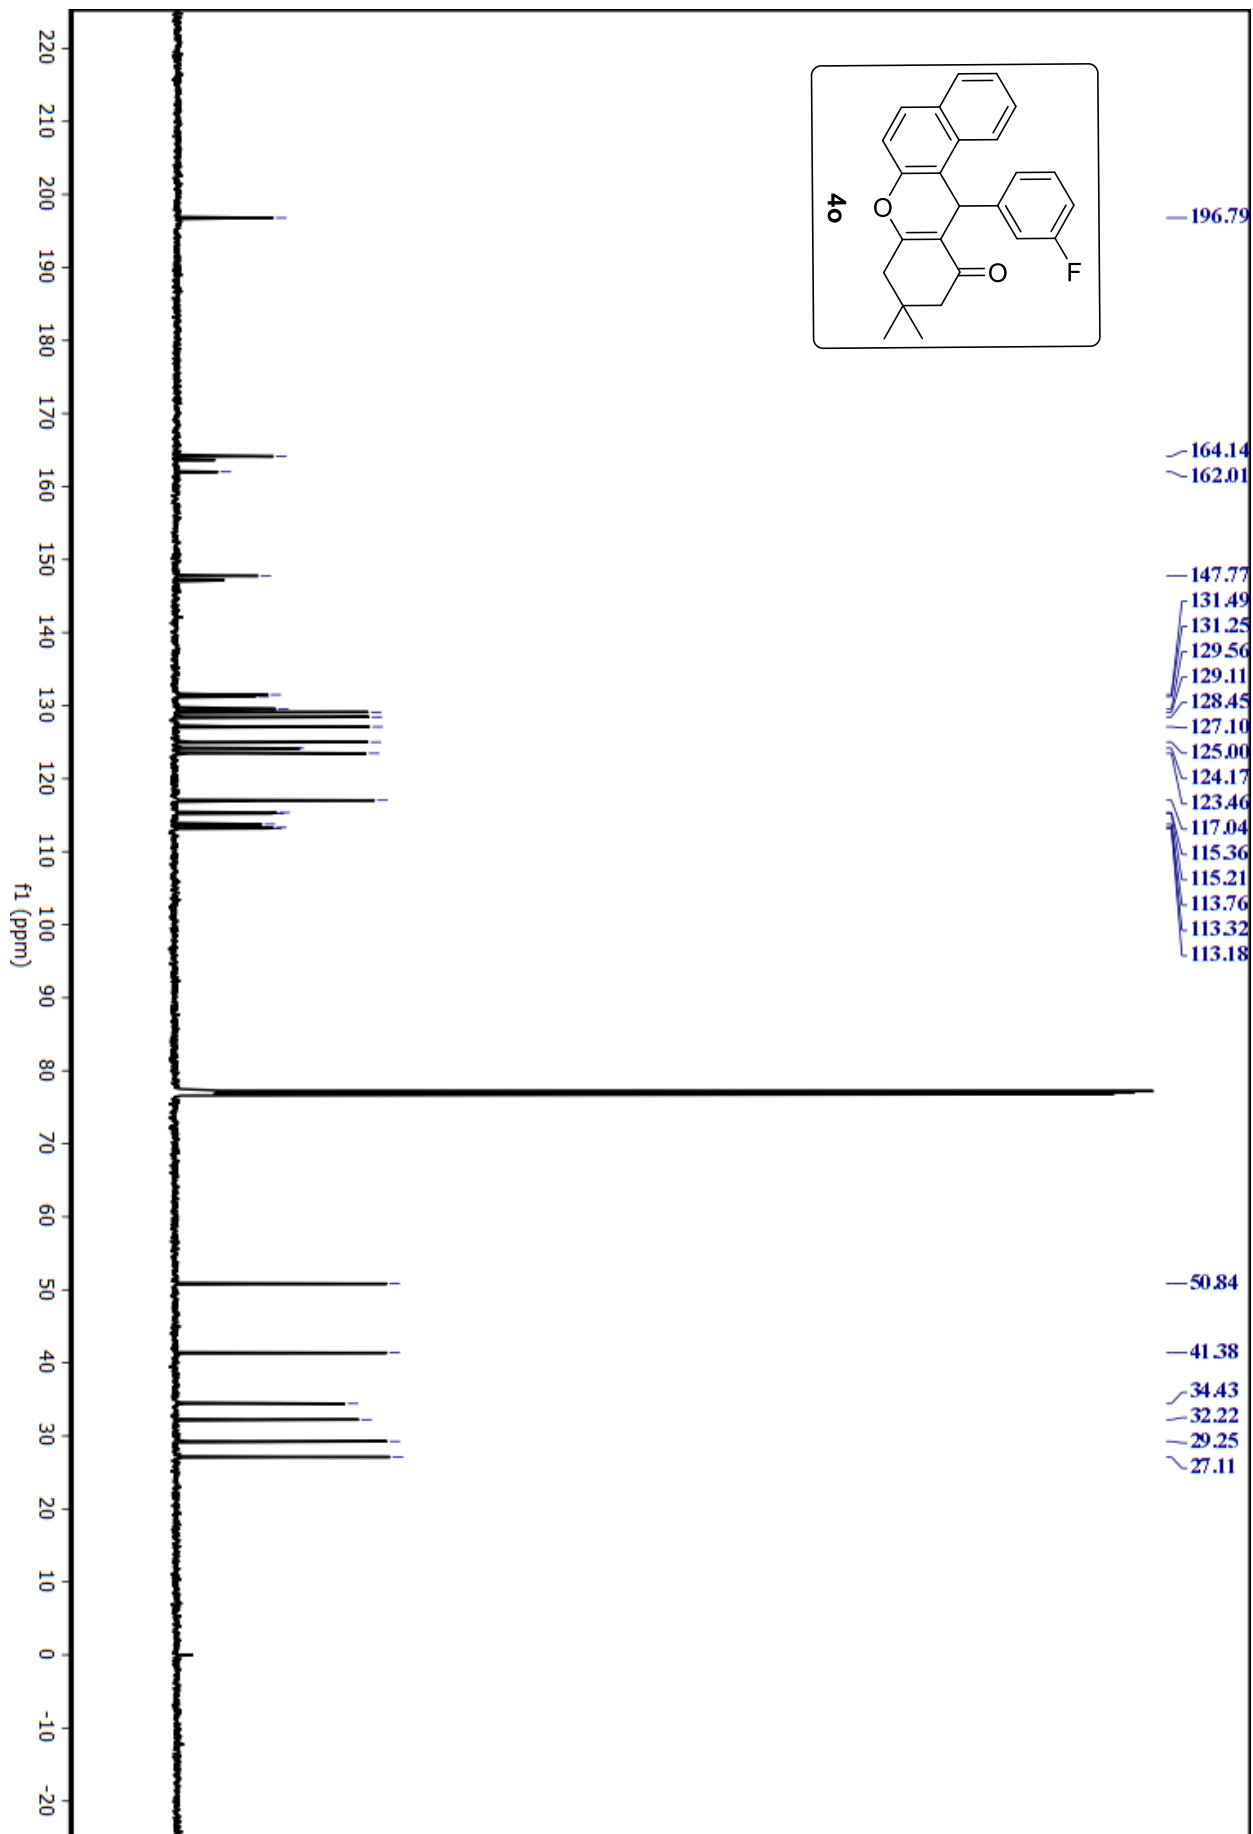

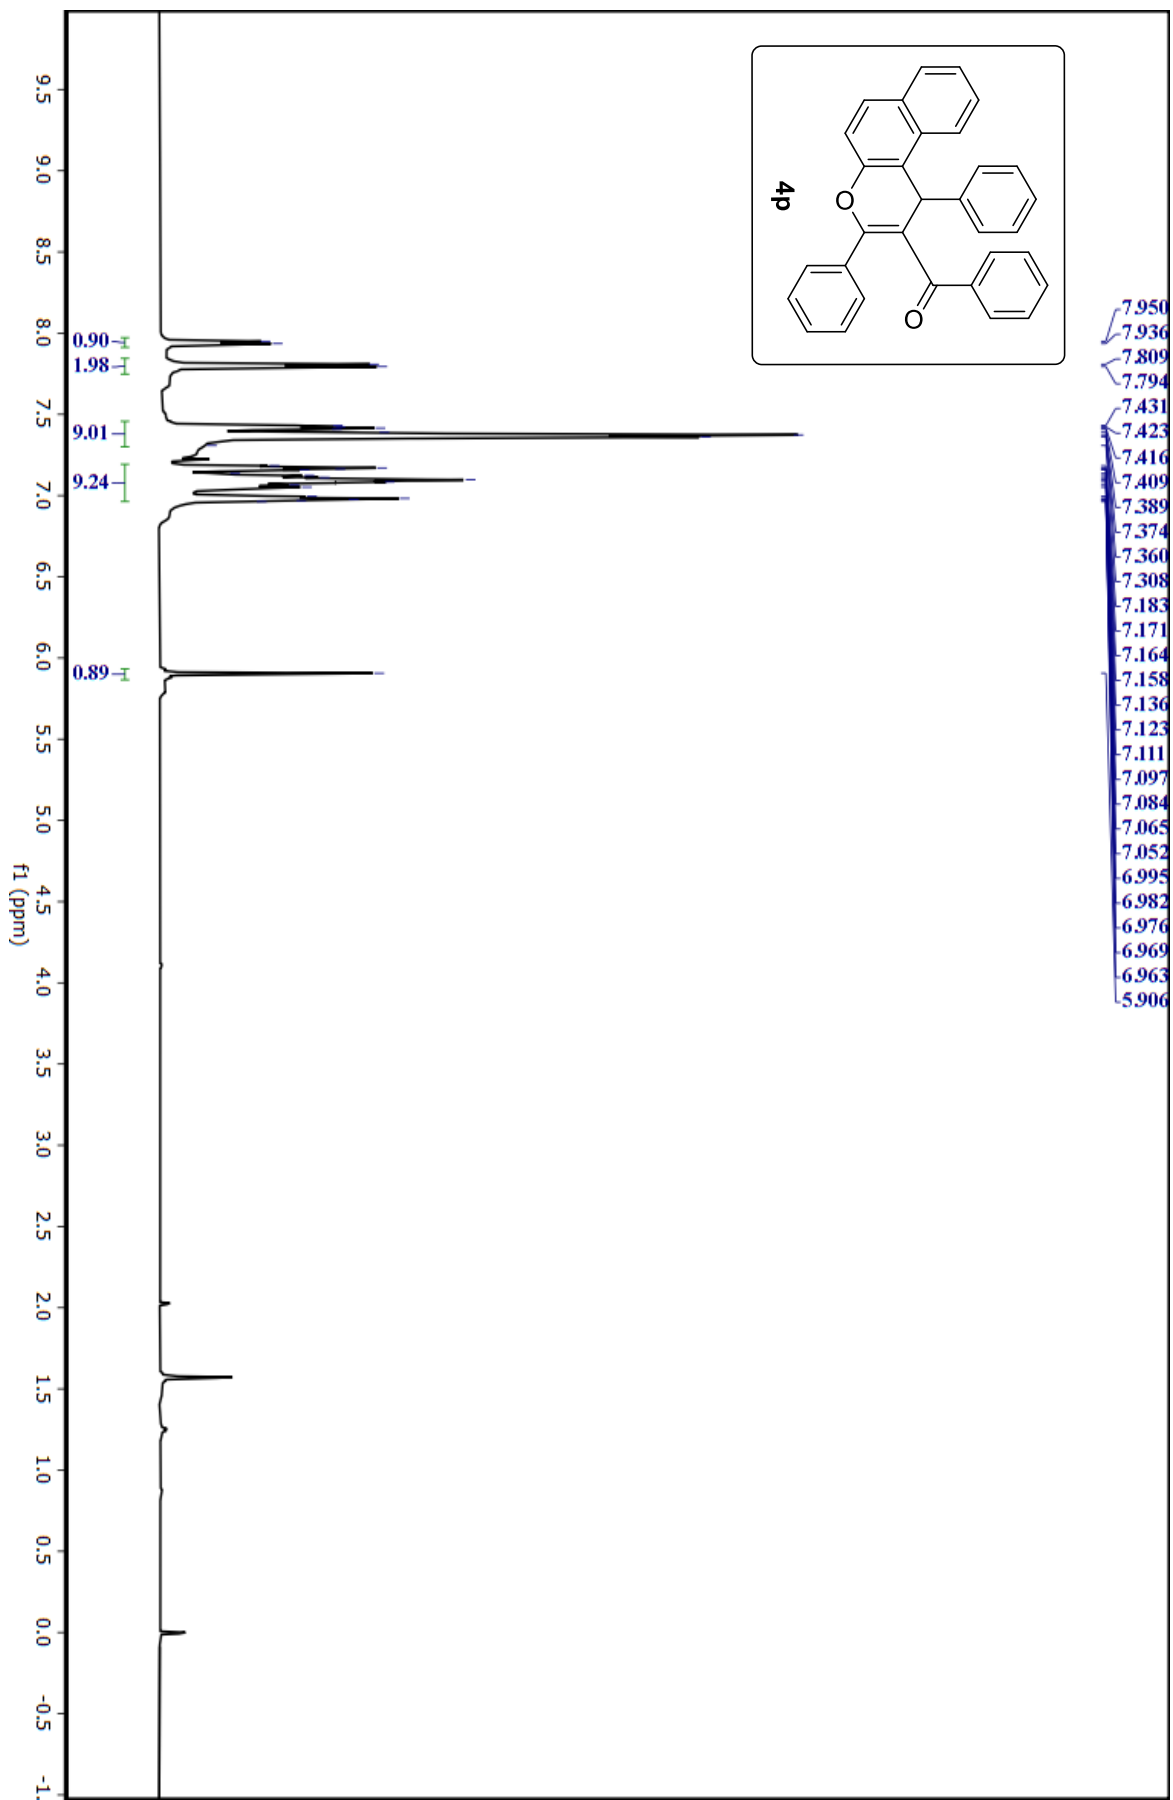

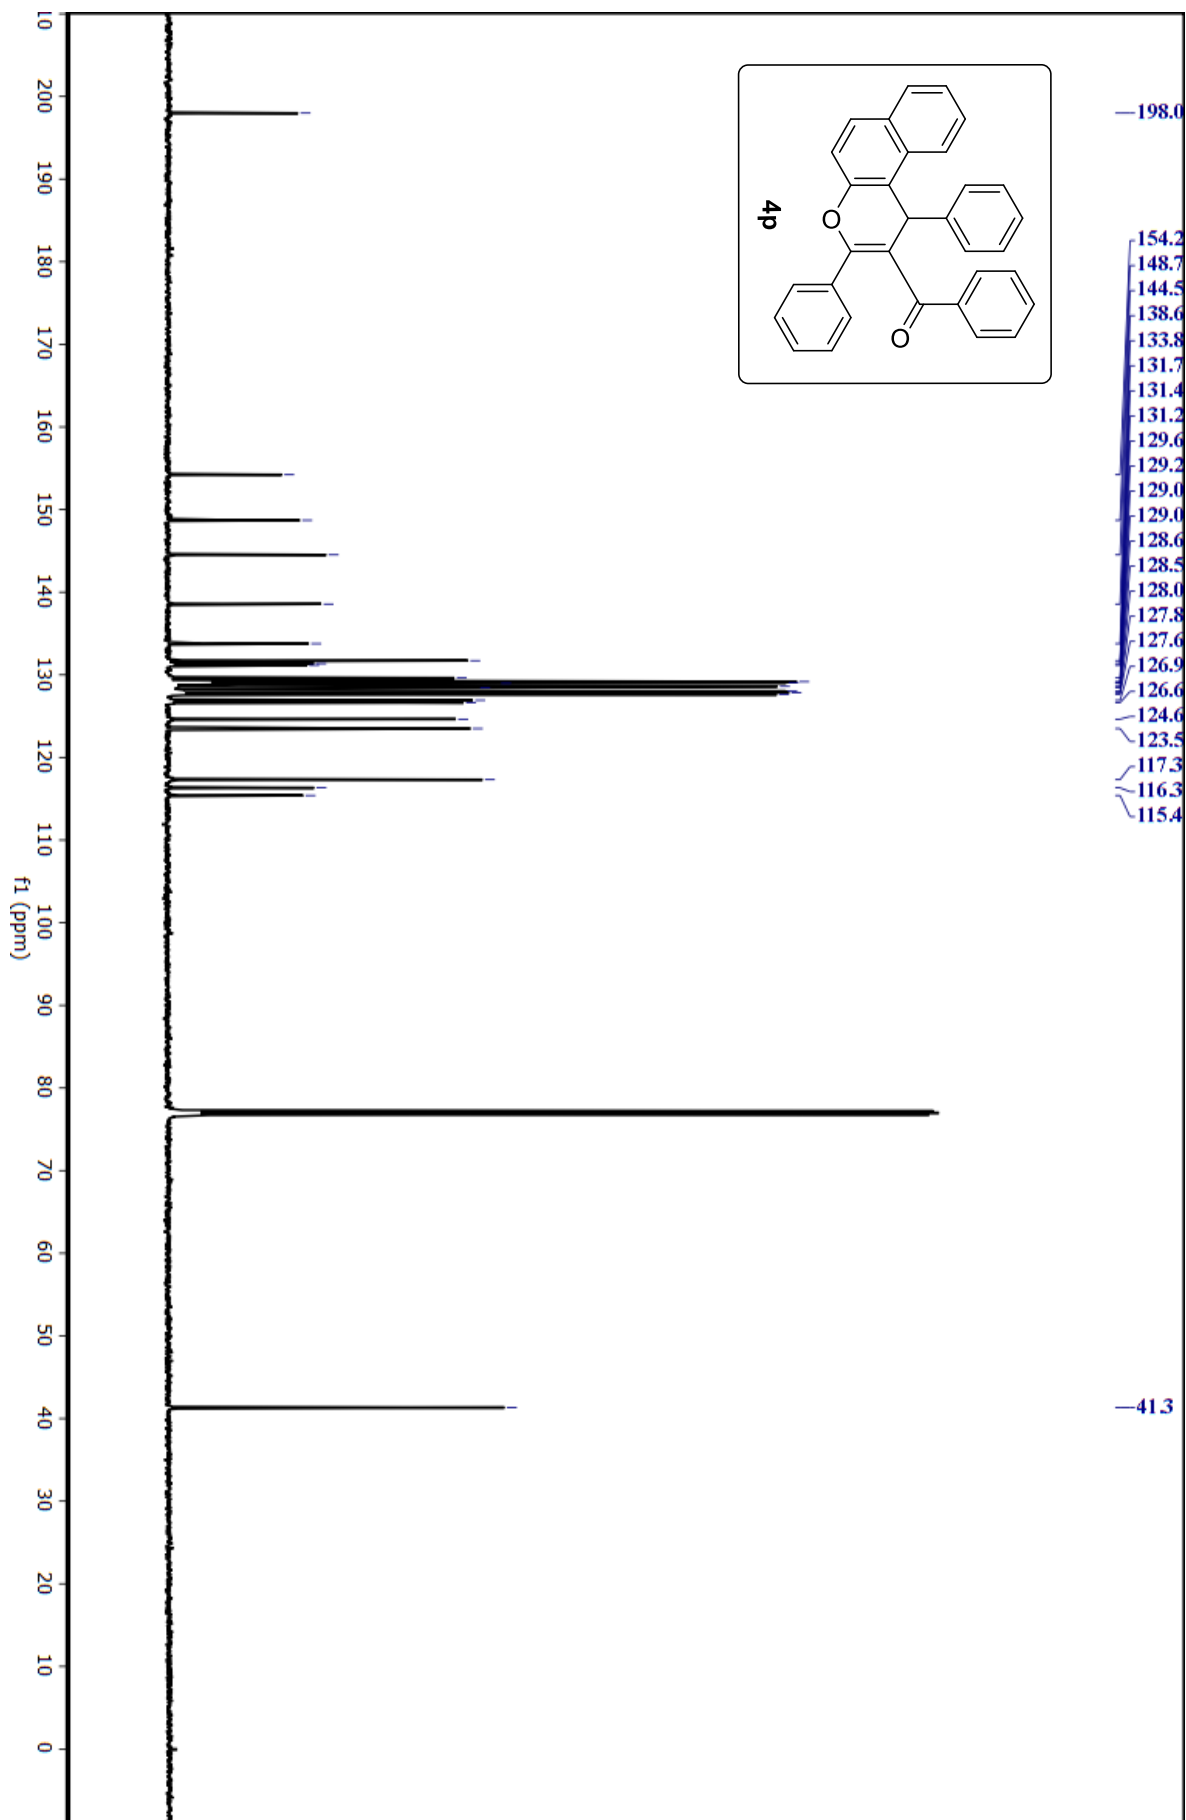

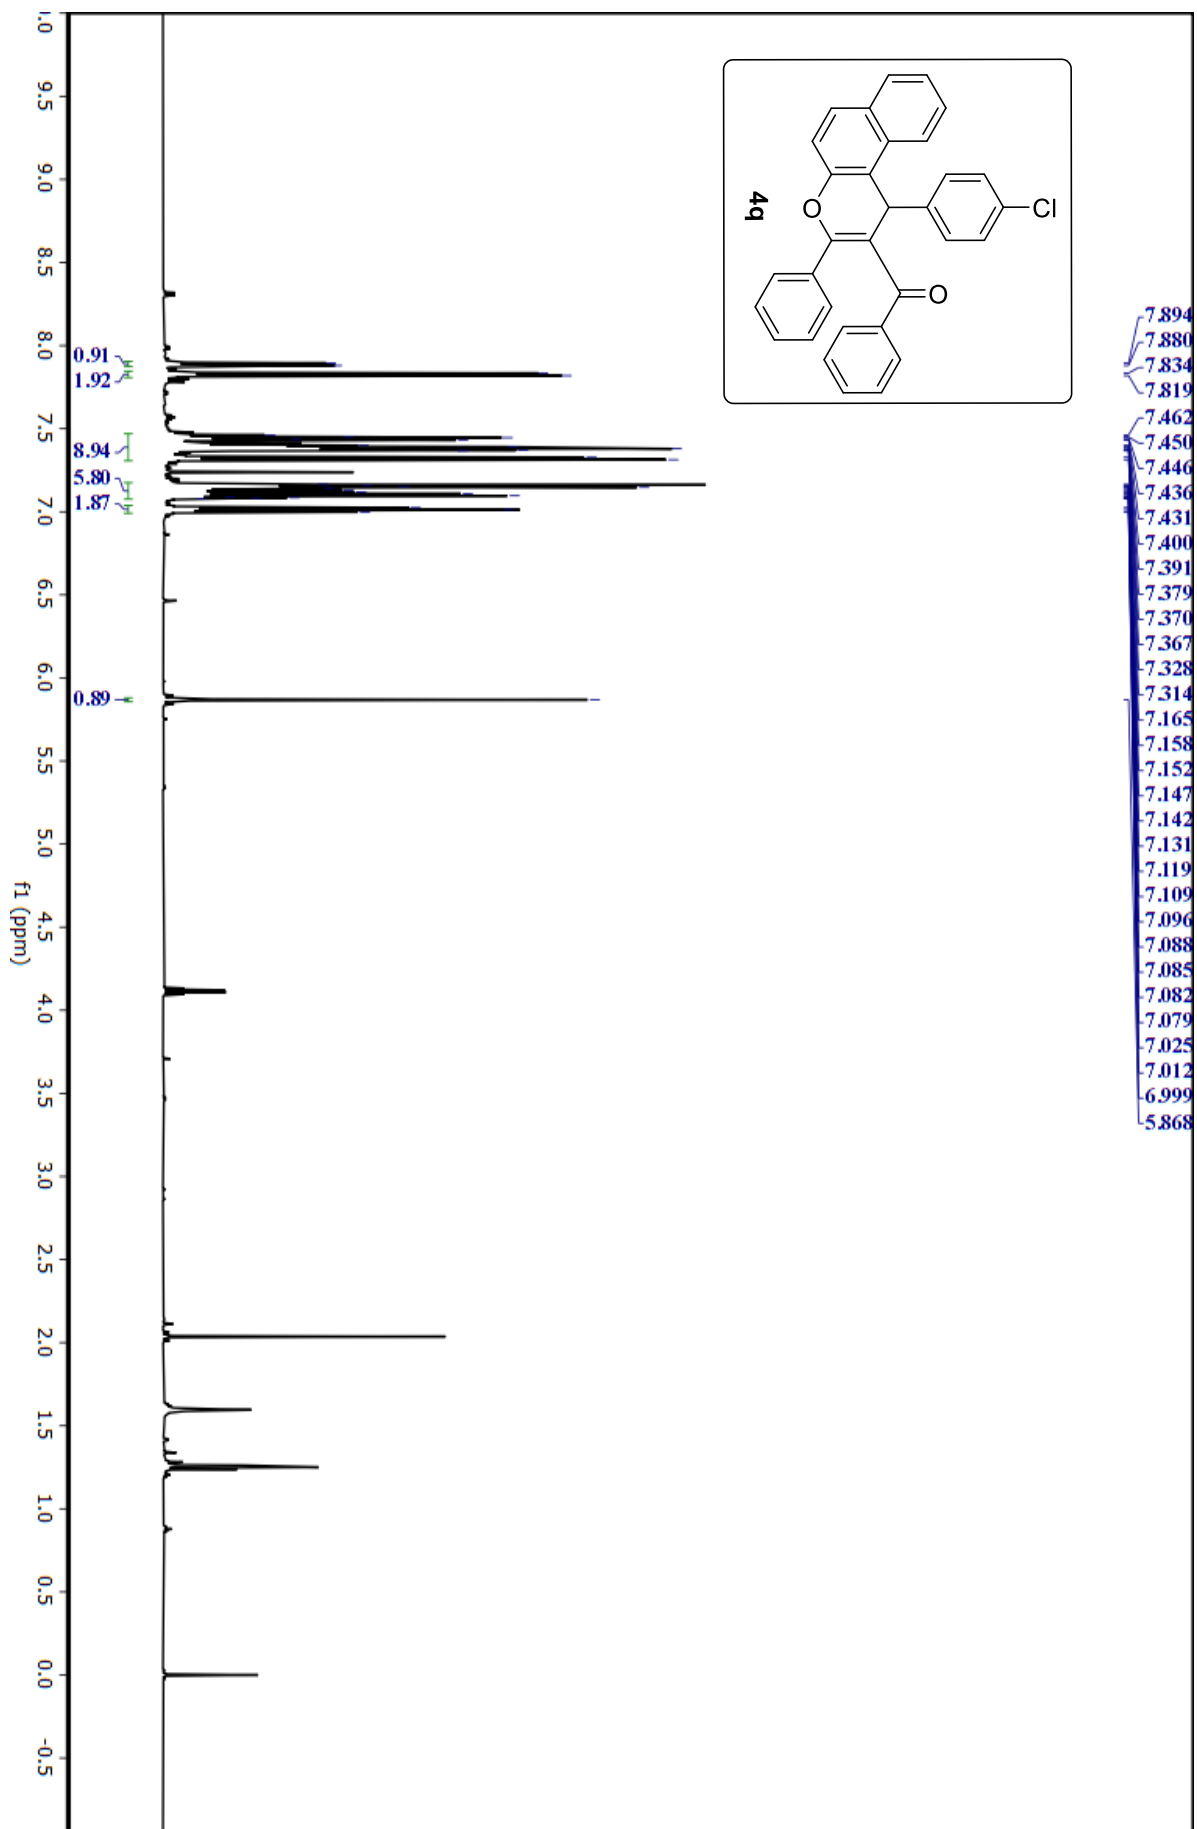

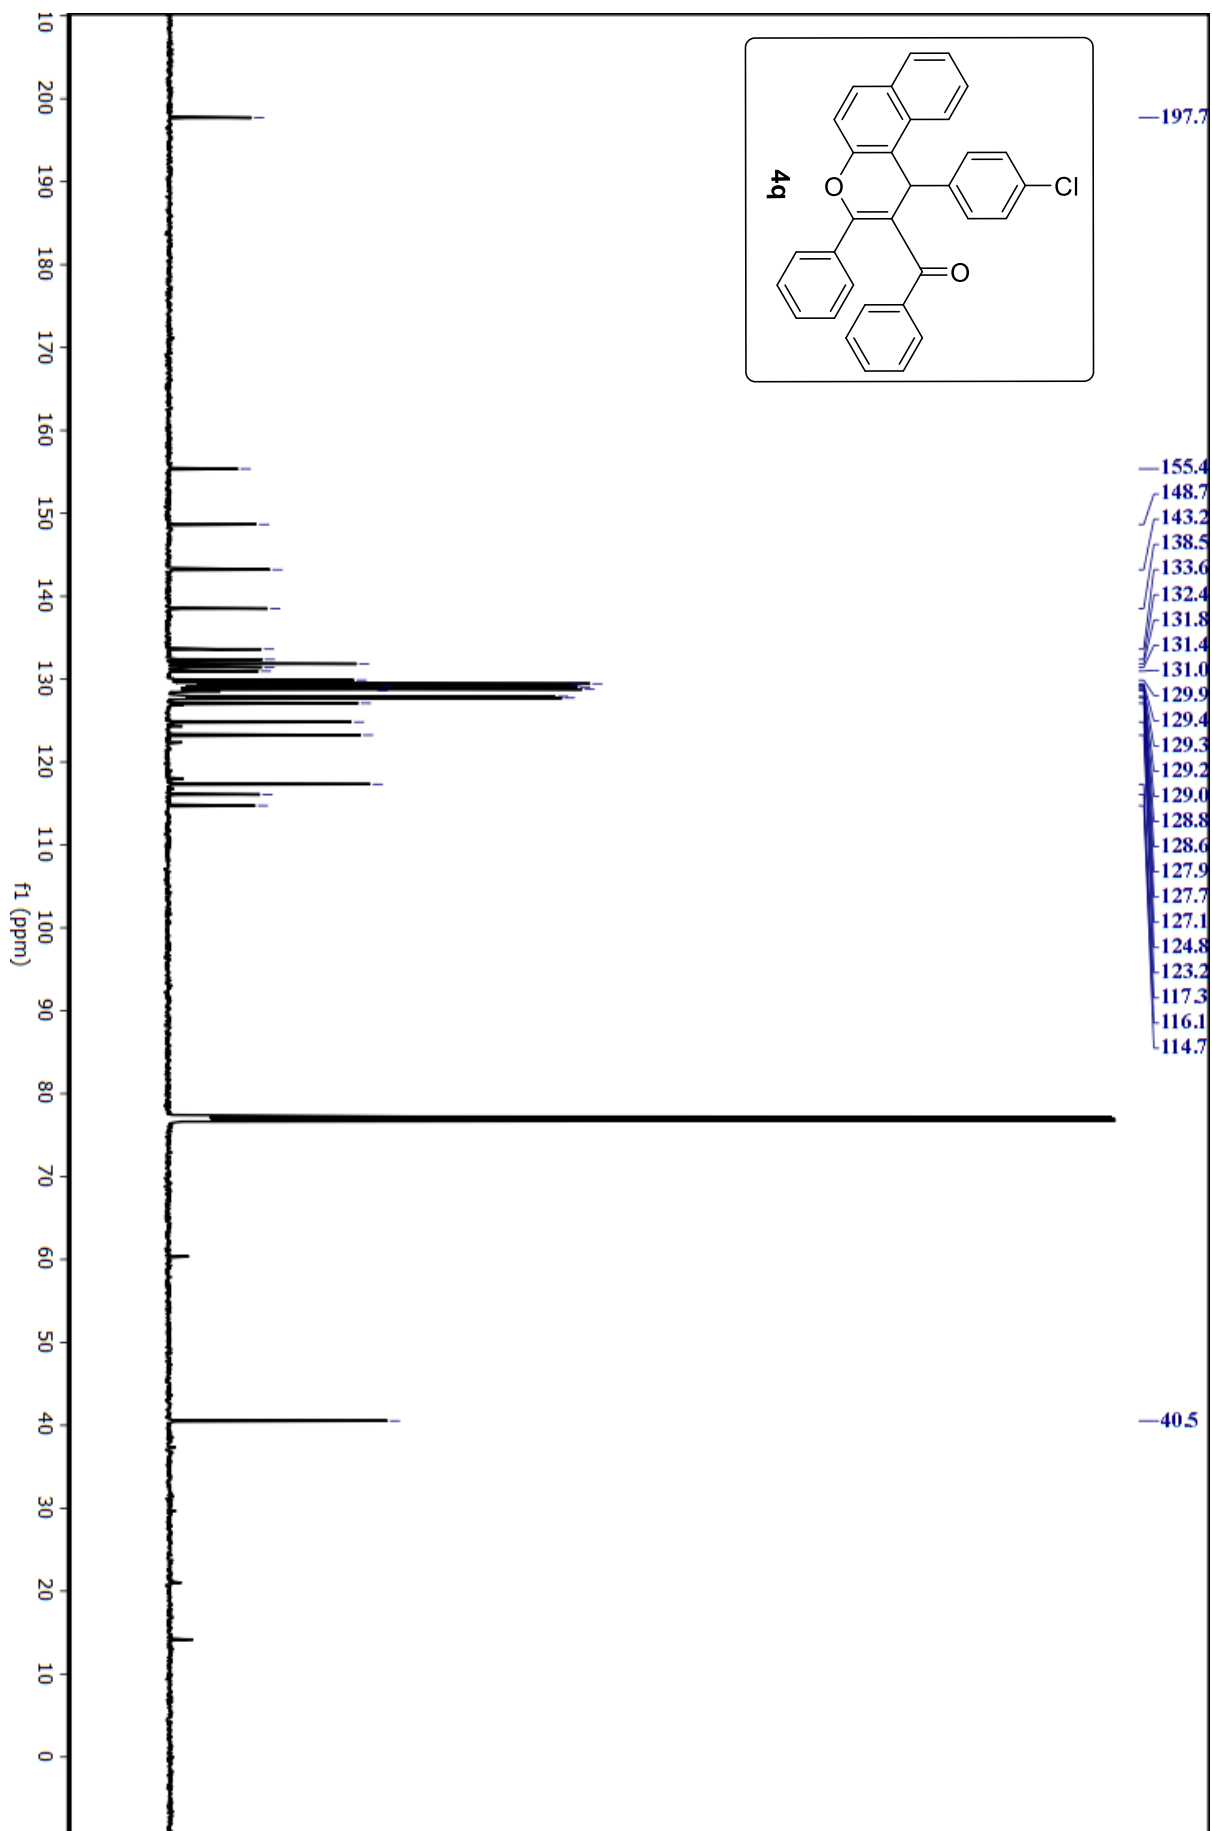

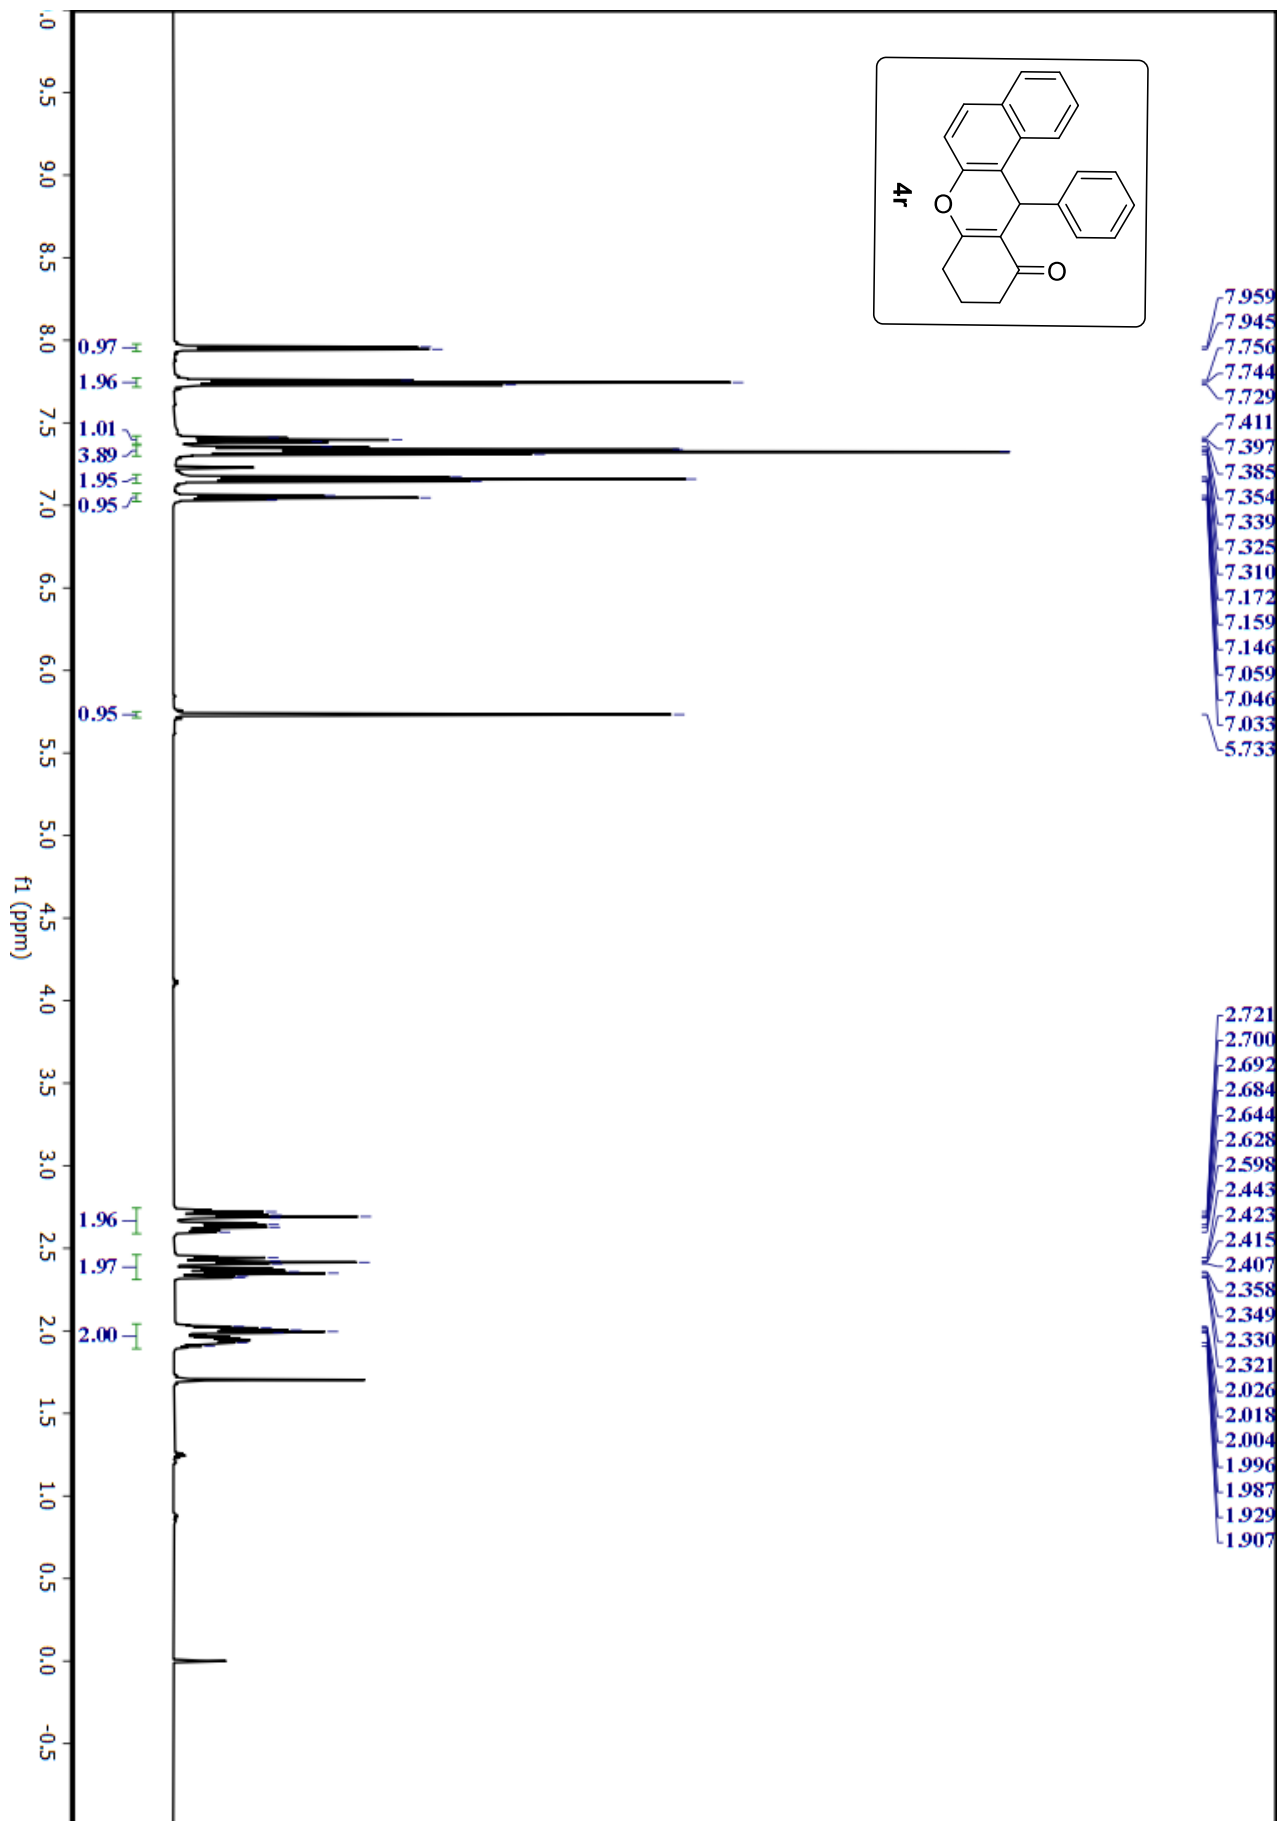



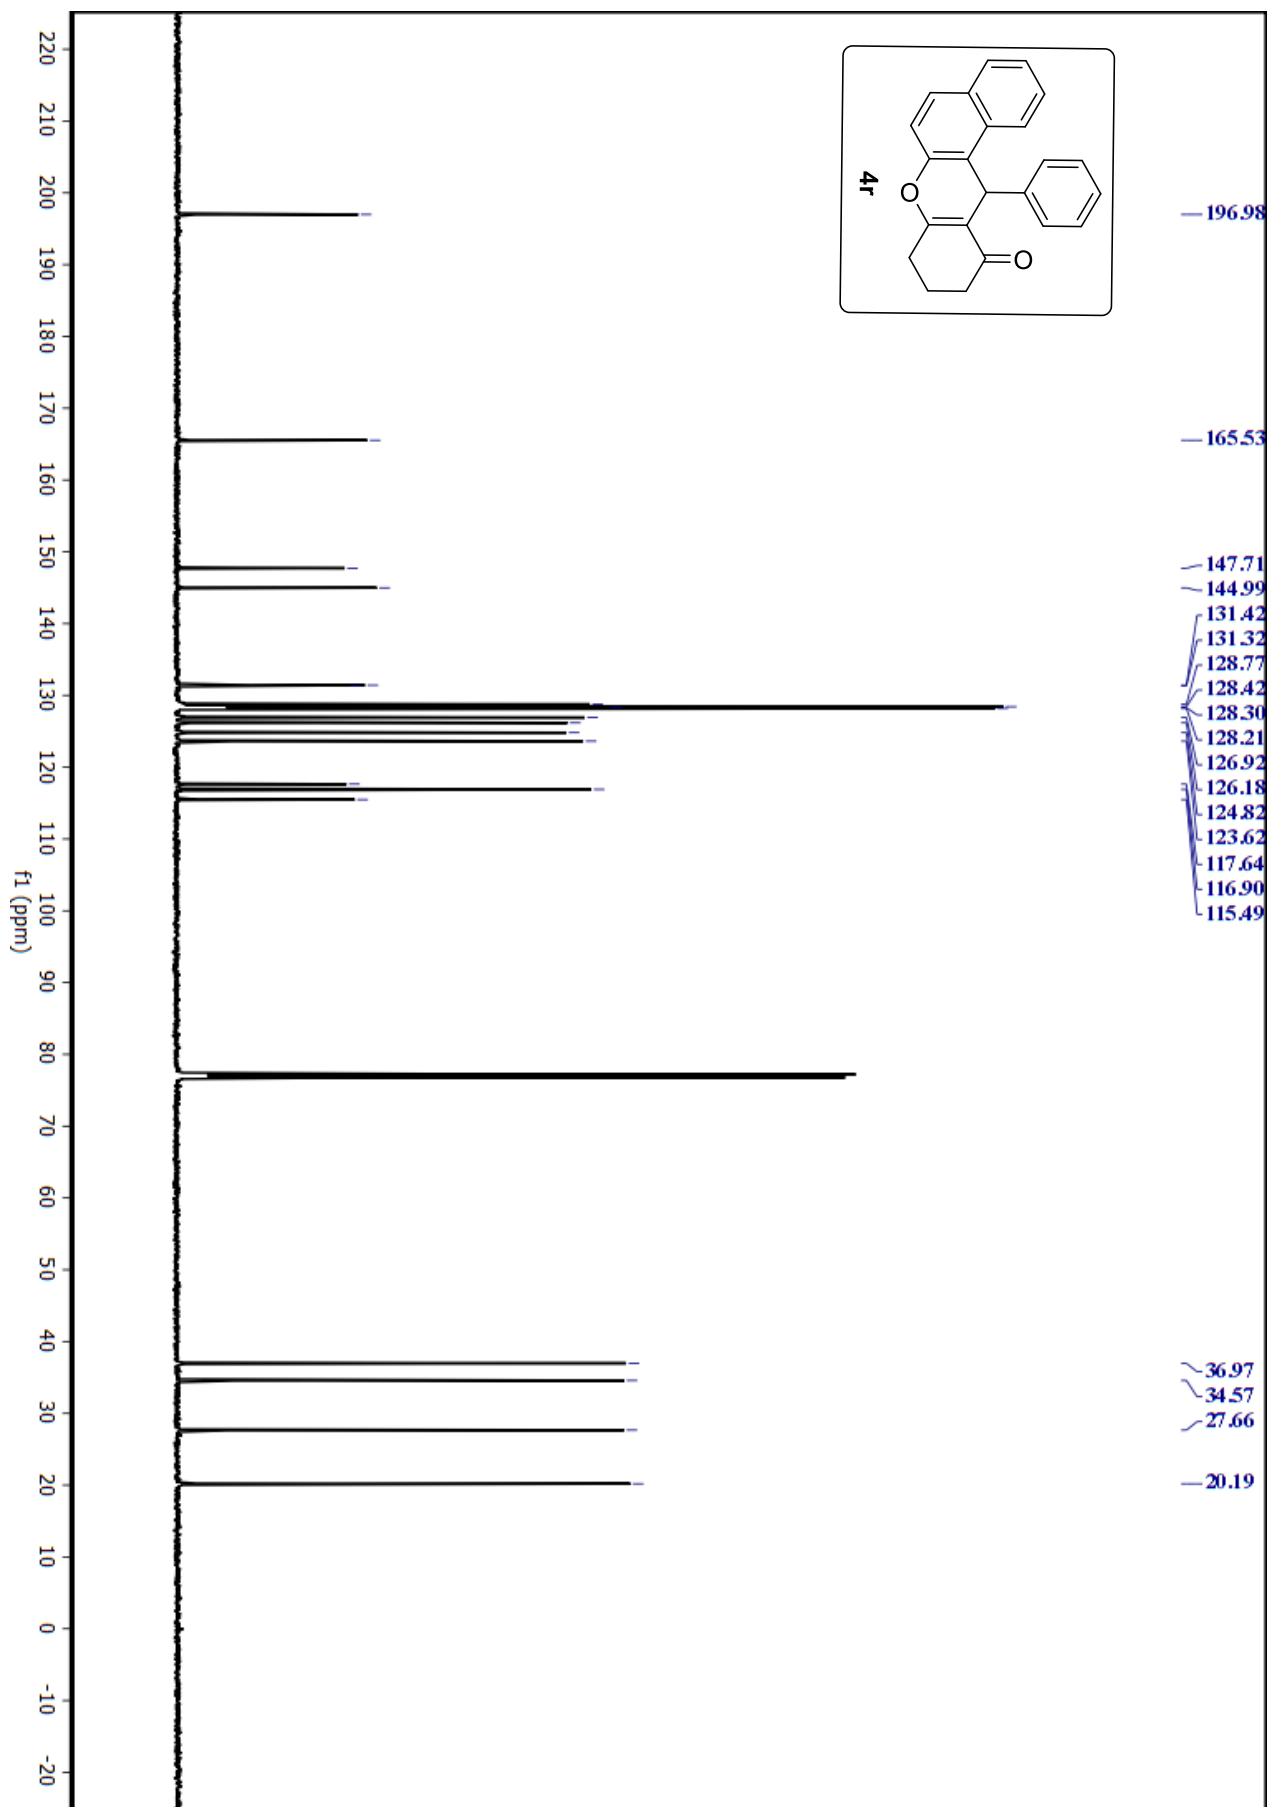

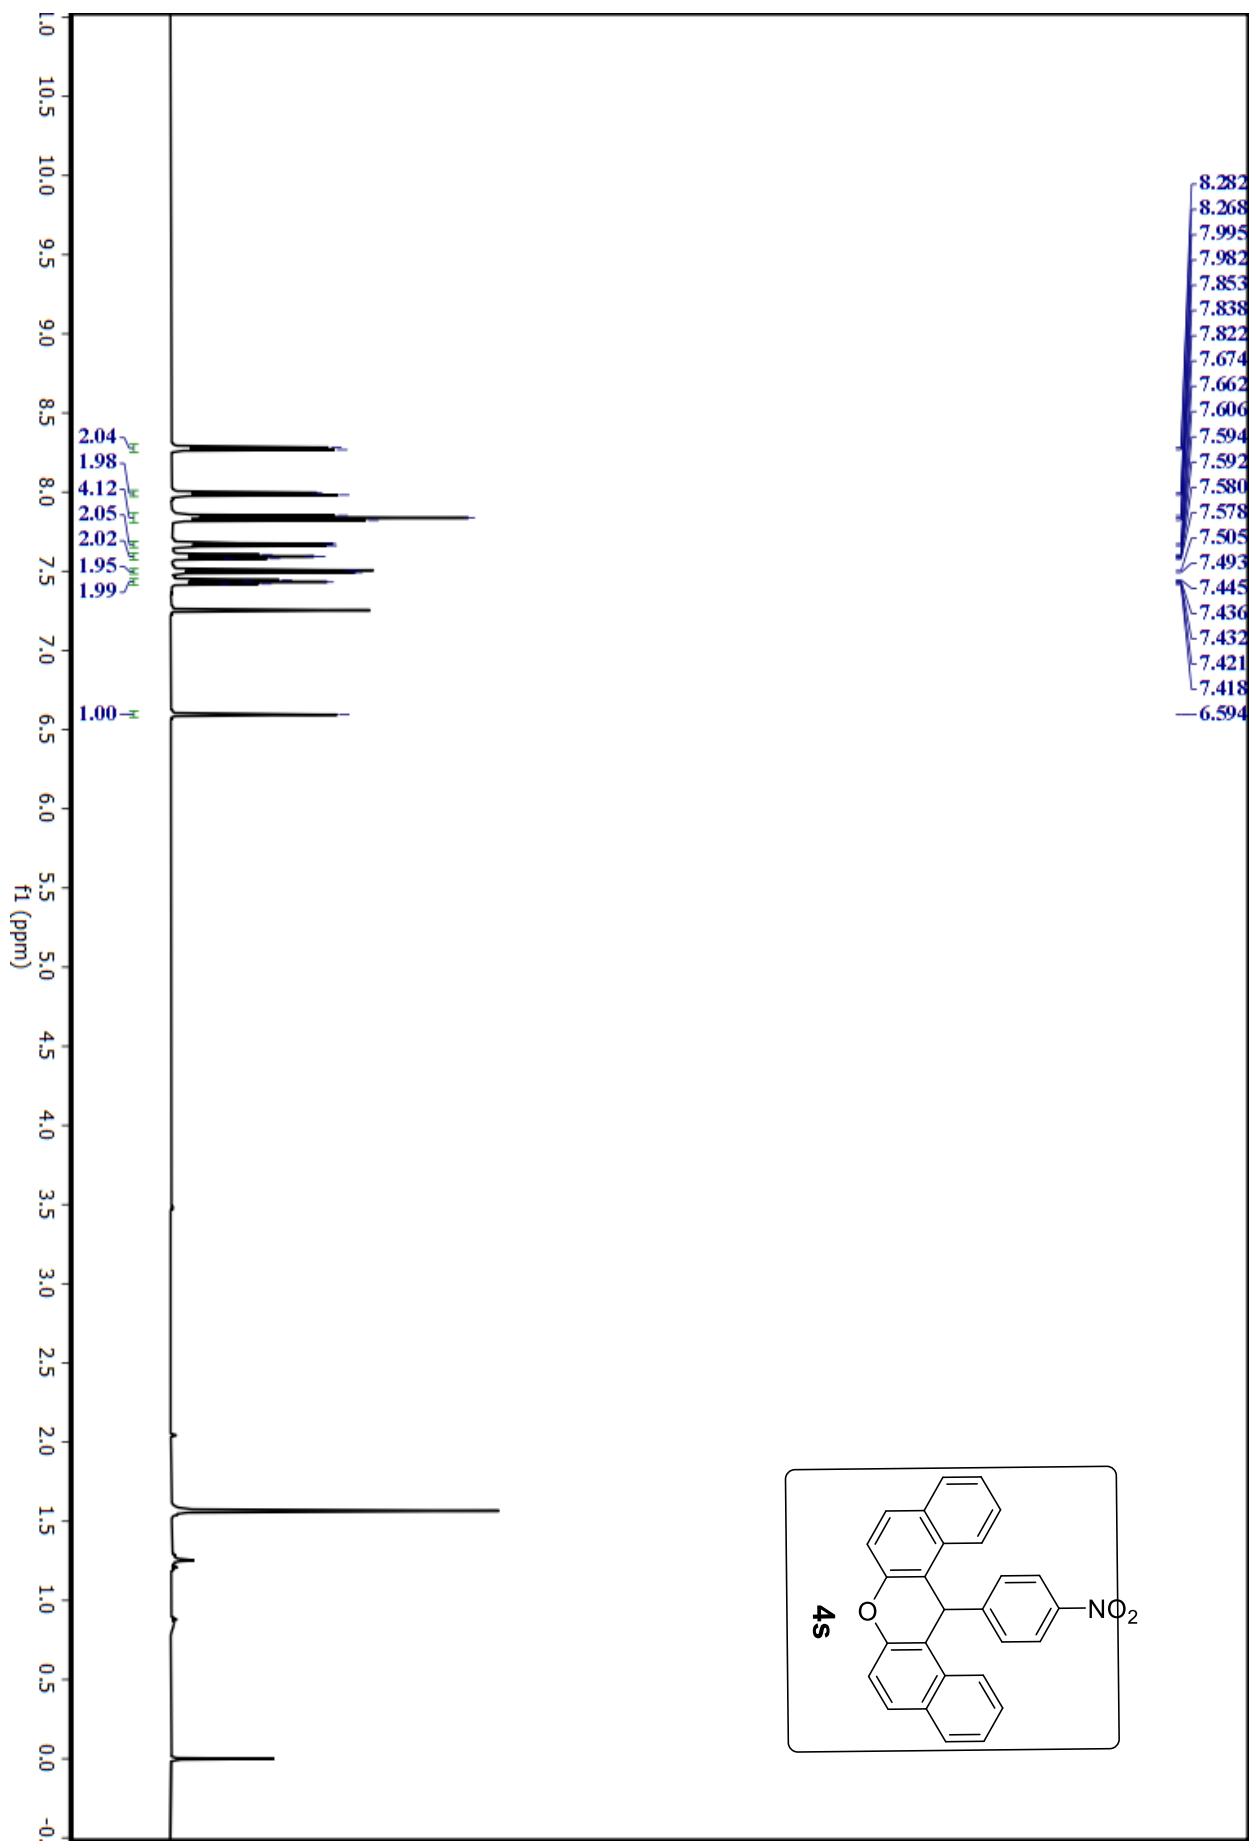

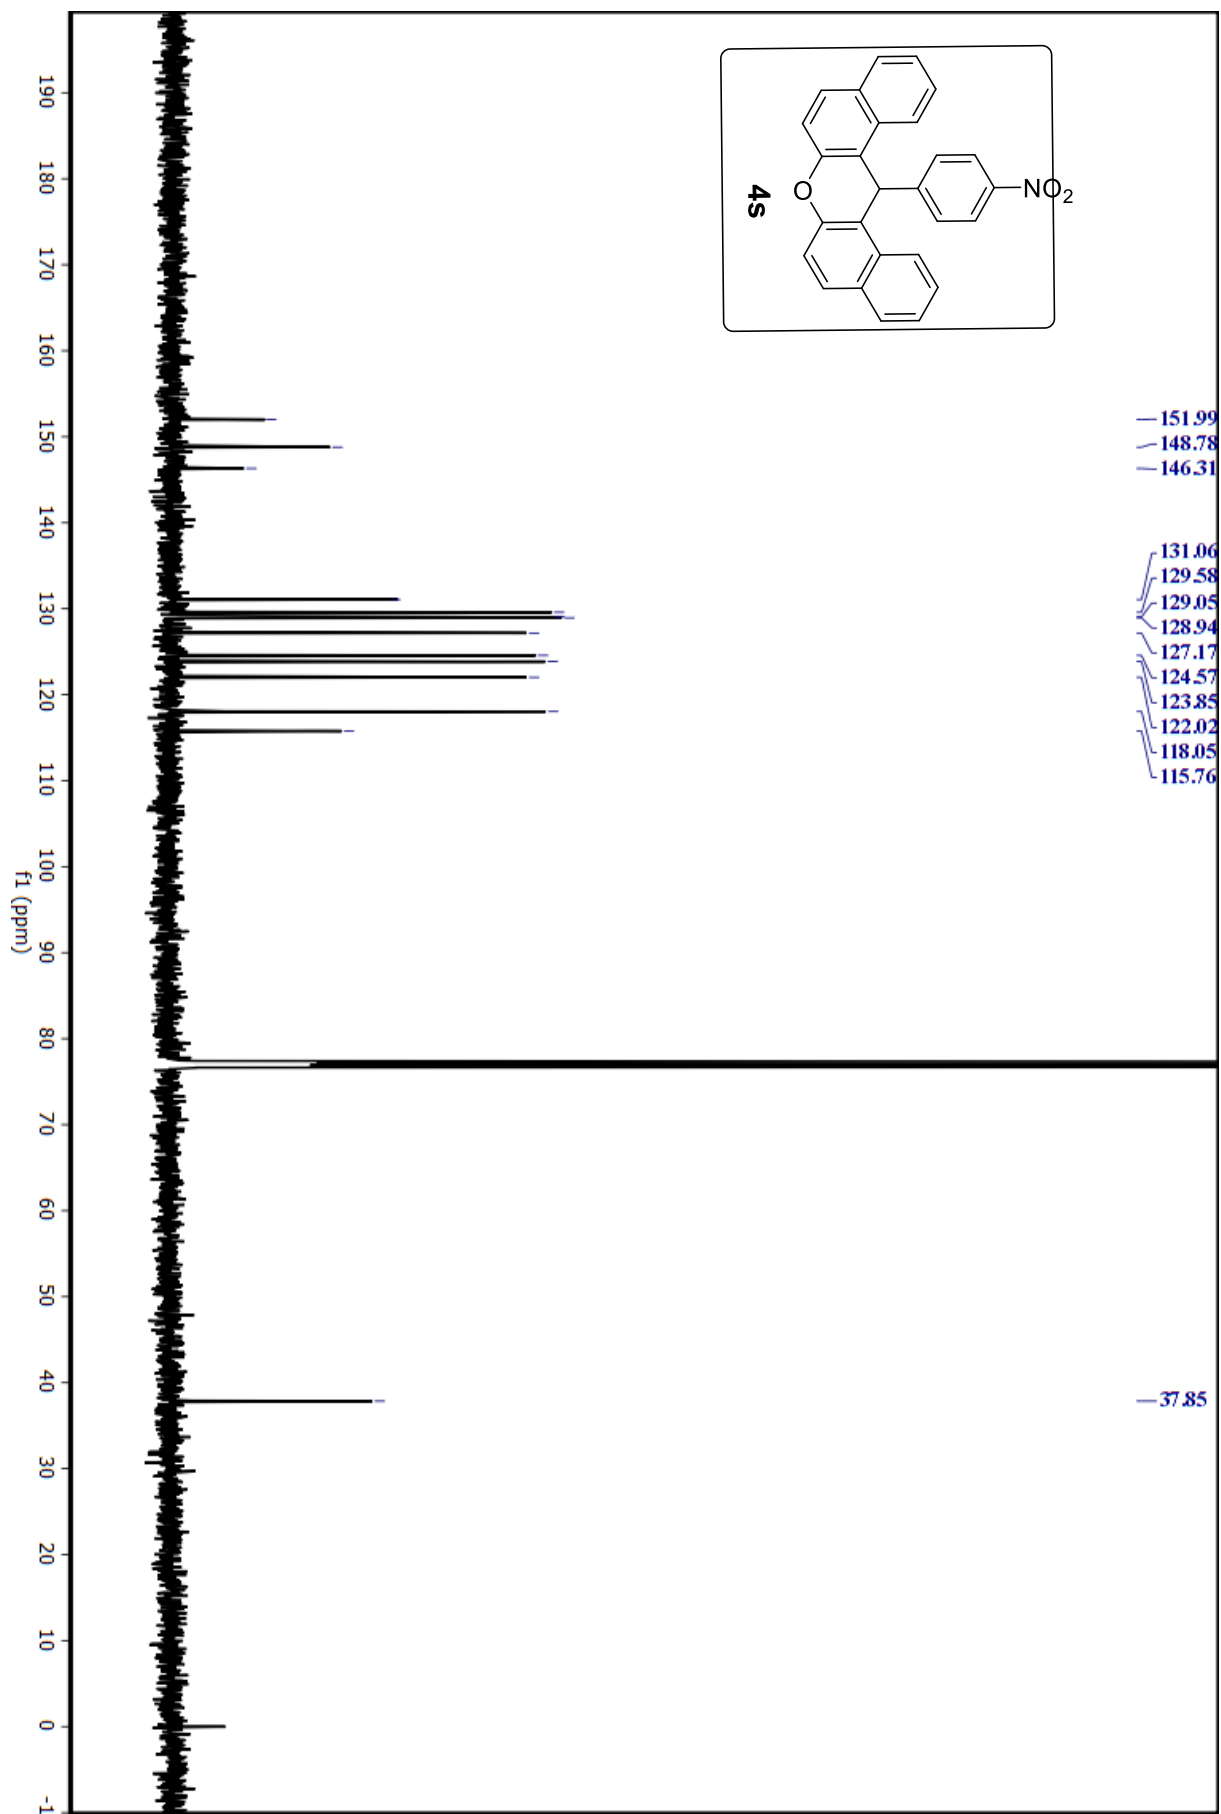

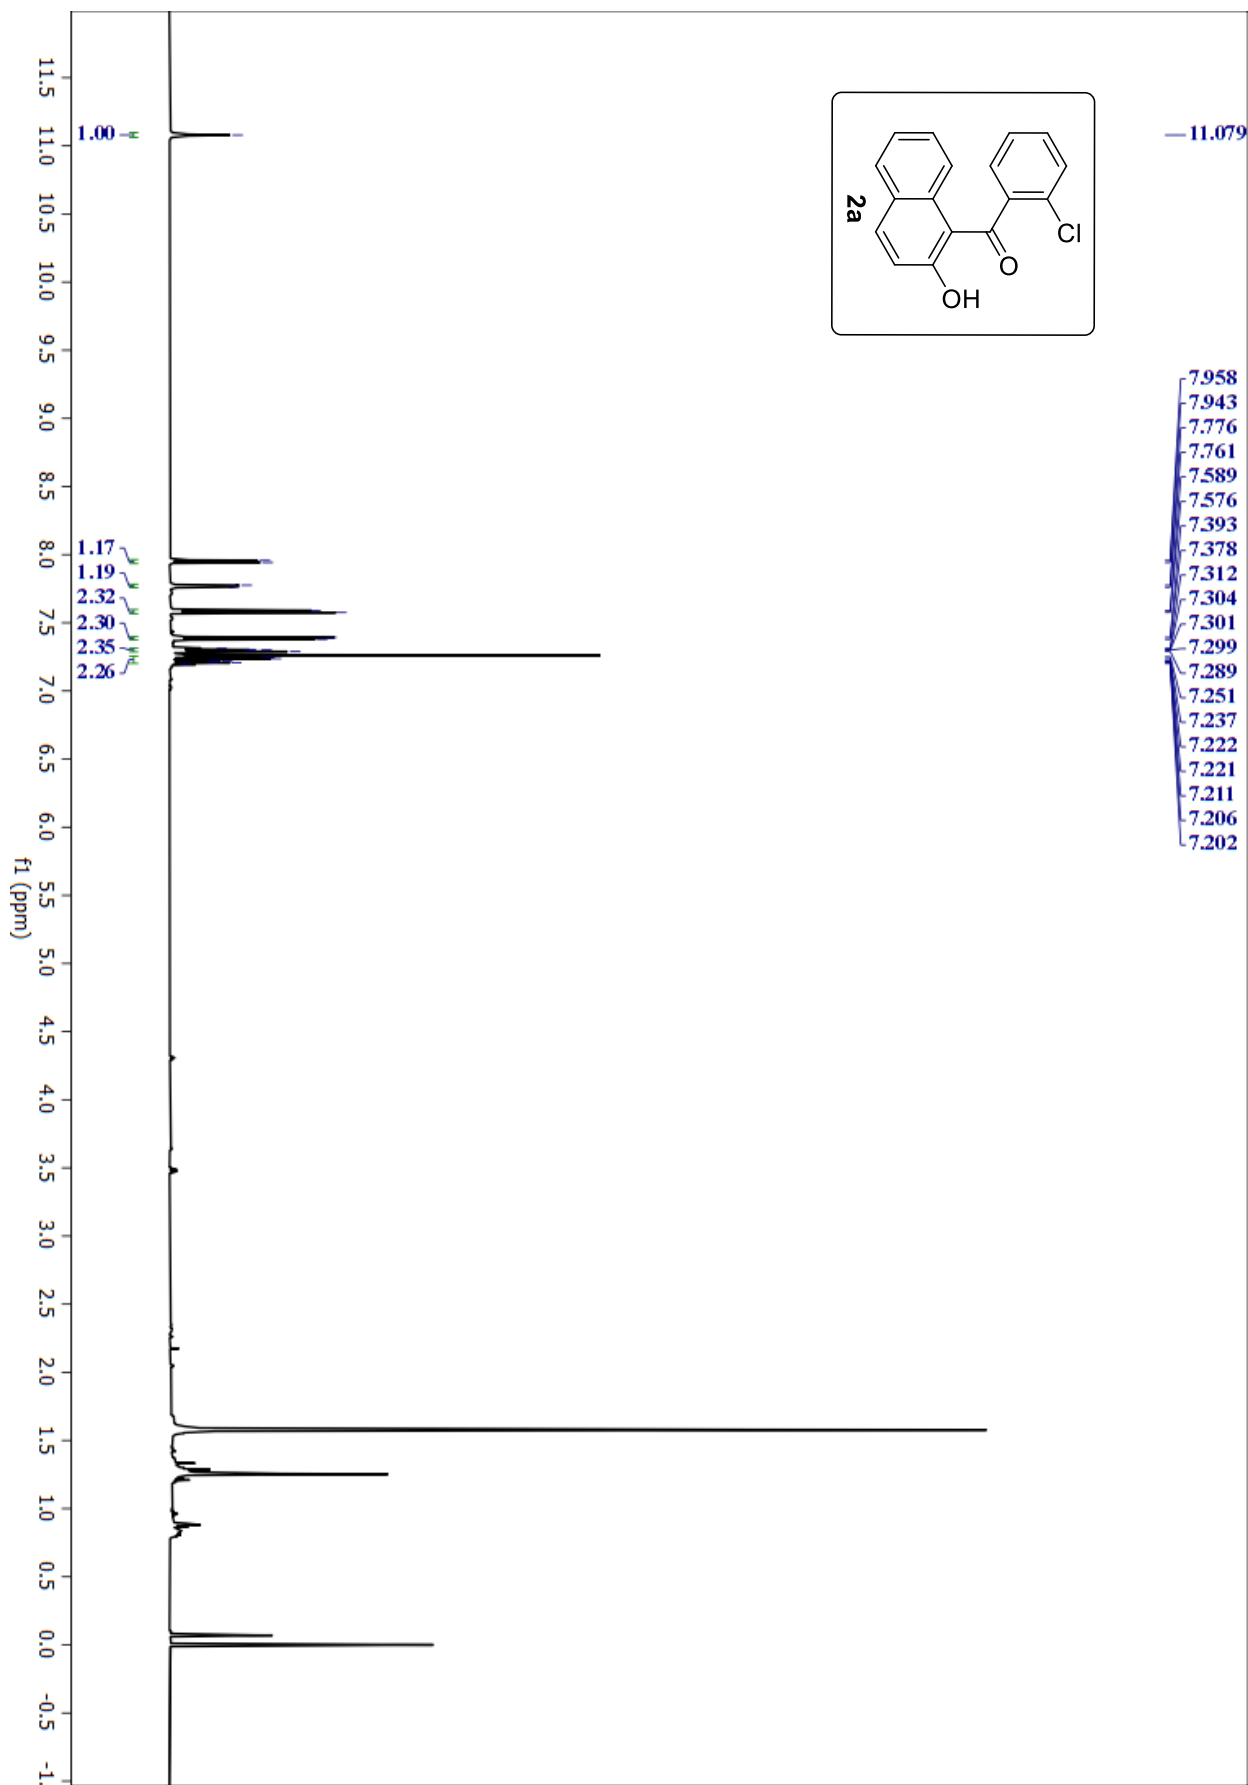

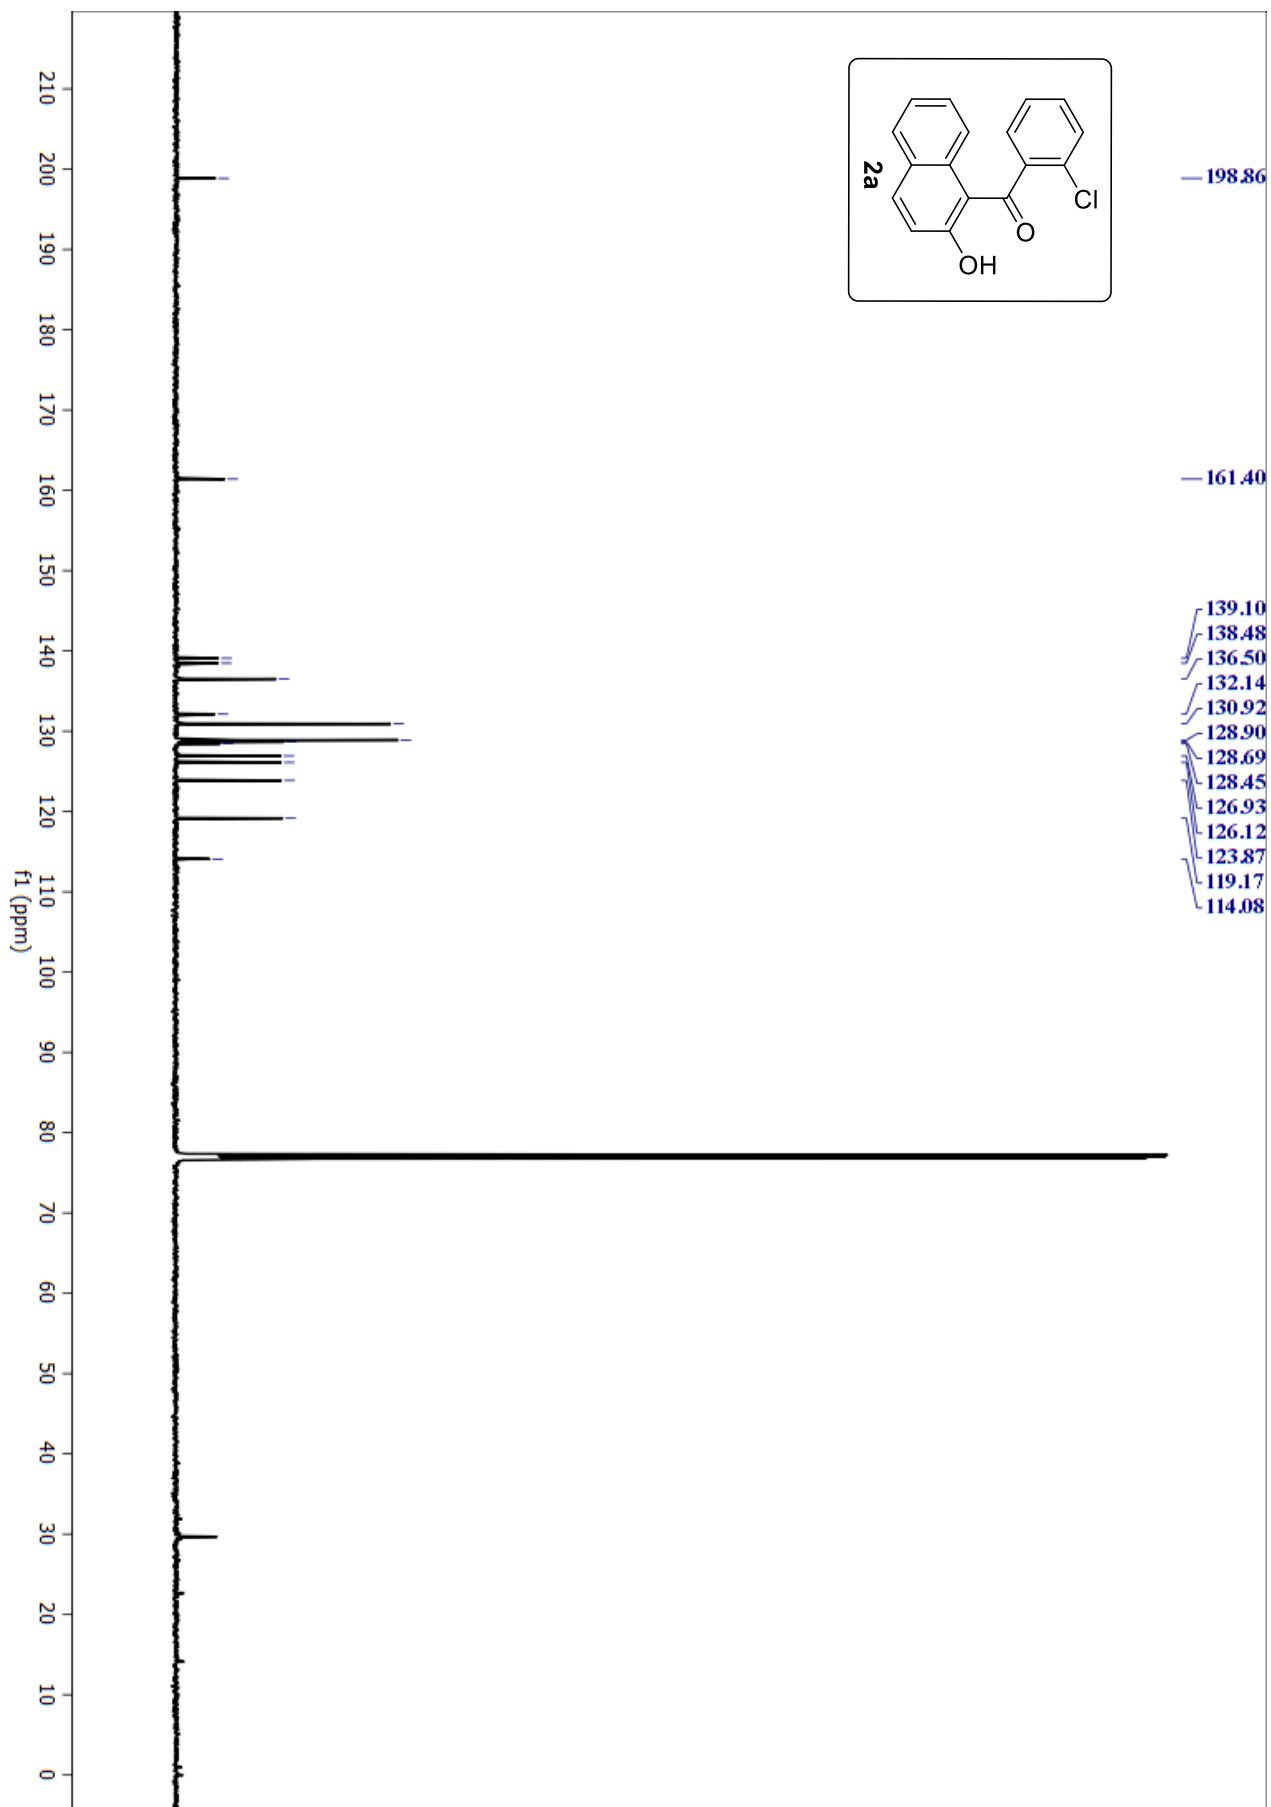

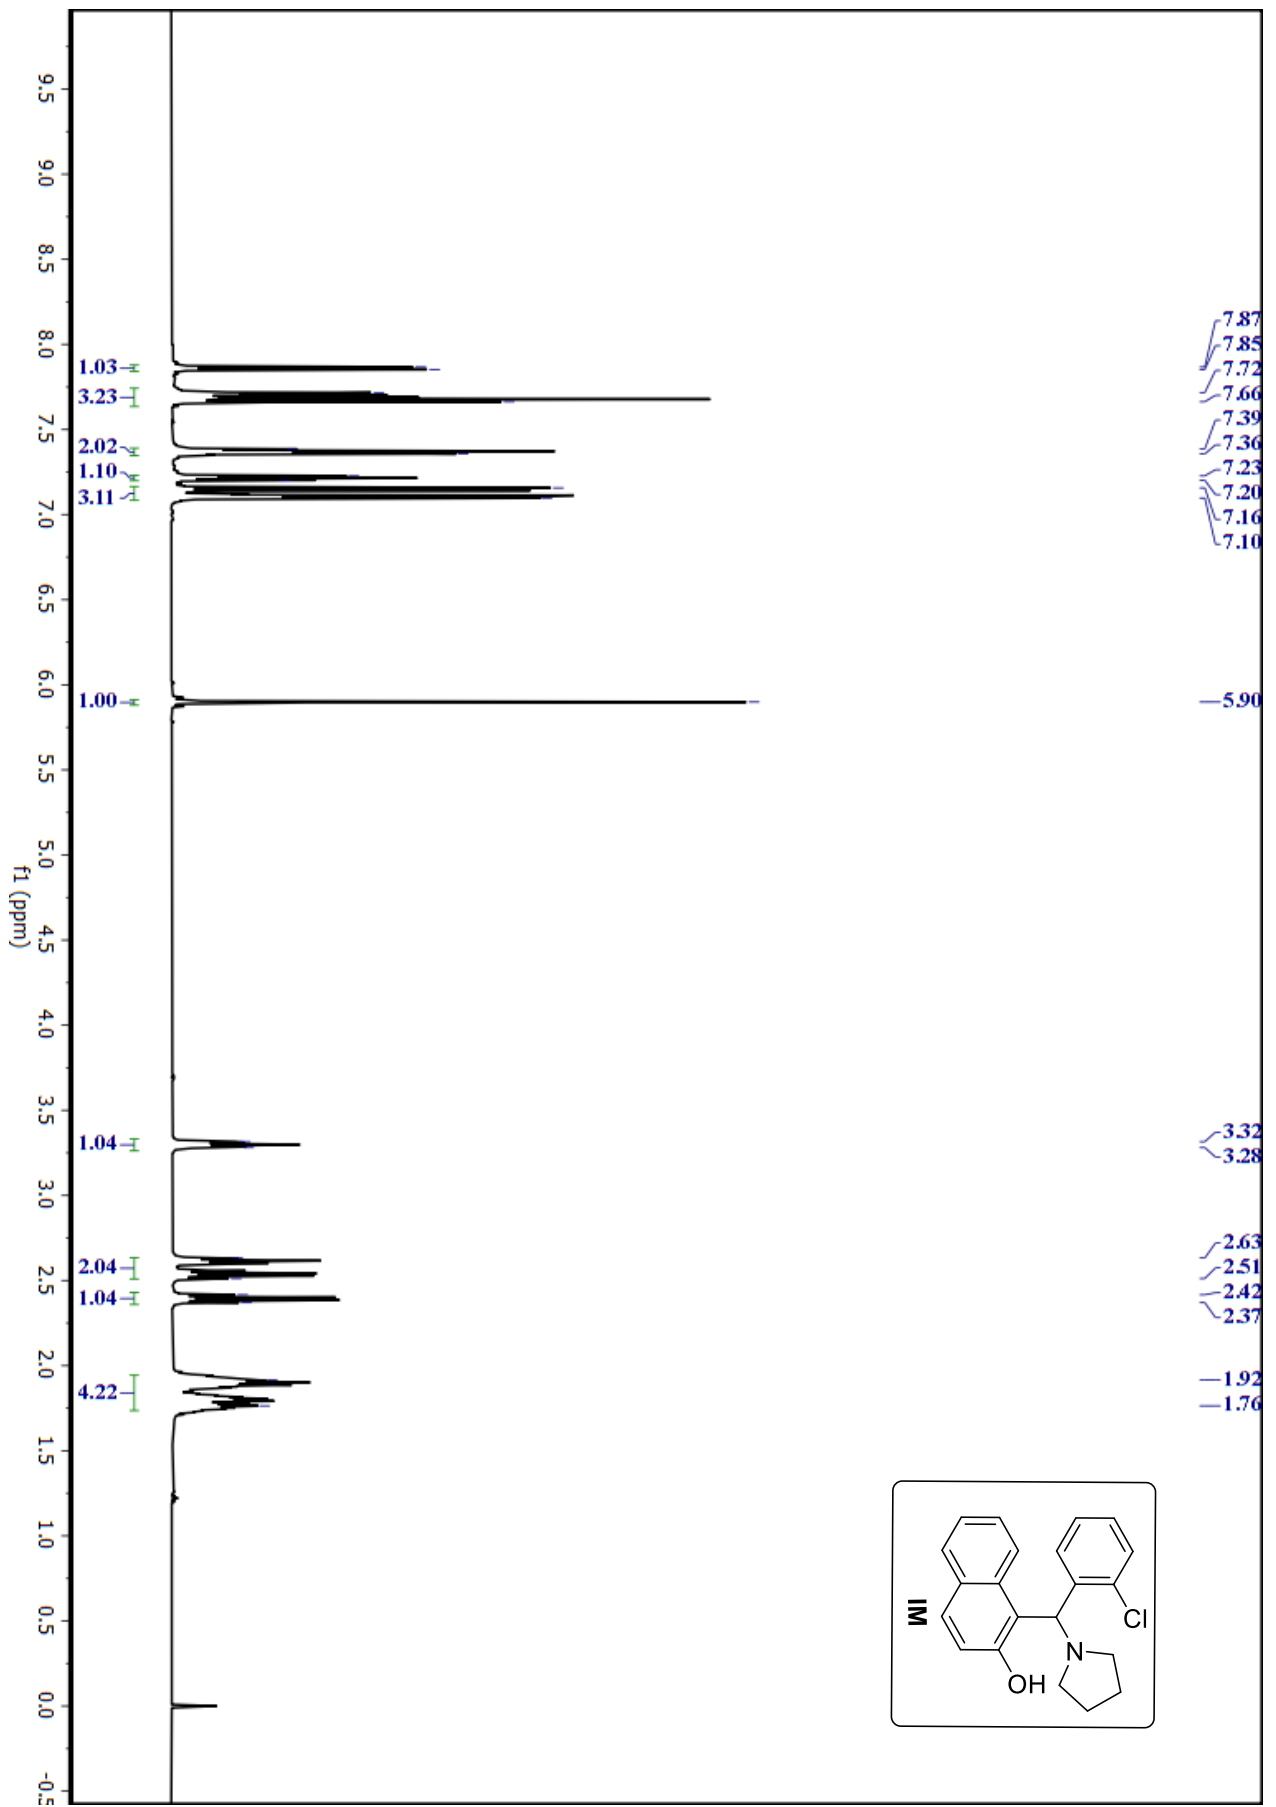

S
